# Supplementary material for: Economic cost of smoking and secondhand smoke exposure in the Gulf Cooperation Council countries
Source: PubMed Central journal article supplement — Tob Control. 2020 Aug 19;30(6):680–6. doi: 10.1136/tobaccocontrol-2020-055715 (PMC8543216; doi:10.1136/tobaccocontrol-2020-055715), 2020-08-19
Supplement: tobaccocontrol-2020-055715supp001.pdf [file tobaccocontrol-2020-055715supp001.pdf]

**Table S1: List of diseases for which mortality and morbidity were estimated****Smoking related diseases****A. Communicable, maternal, neonatal, and nutritional diseases****A.1 Respiratory infections and tuberculosis**

Tuberculosis, Lower respiratory infections

**B. Non-communicable diseases****B.1 Neoplasms**

Esophageal cancer, Stomach cancer, Liver cancer, Larynx cancer, Tracheal, bronchus, &amp; lung cancer, Breast cancer (women only), Cervical cancer (women only), Prostate cancer (men only), Colon and rectum cancer, Lip and oral cavity cancer, Nasopharynx cancer, Other pharynx cancer, Pancreatic cancer, Kidney cancer, Bladder cancer, Leukemia

**B.2 Cardiovascular diseases**

Ischemic heart disease, Stroke, Atrial fibrillation and flutter, Aortic aneurysm (only for mortality), Peripheral artery disease

**B.3 Chronic respiratory diseases**

Chronic obstructive pulmonary disease, Asthma

**B.4 Digestive diseases**

Upper digestive system diseases, Gallbladder and biliary diseases

**B.5 Neurological disorders**

Alzheimer's disease and other dementias, Parkinson's disease, Multiple sclerosis

**B.6 Diabetes and kidney diseases**

Diabetes mellitus

**B.7 Sense organ diseases**

Blindness and vision impairment (cataract and age-related macular degeneration)

**C. Injuries****C.1 Transport Injuries**

Road injuries, Other transport injuries

**C.2 Unintentional injuries**

Falls, Exposure to mechanical forces, Animal contact

**C.3 Self-harm and interpersonal violence**

Interpersonal violence

**SHS related diseases****A. Communicable, maternal, neonatal, and nutritional diseases****A.1 Respiratory infections and tuberculosis**

Lower respiratory infections

**B. Non-communicable diseases****B.1 Neoplasms**

Tracheal, bronchus &amp; lung cancer, Breast cancer (women only)

**B.2 Cardiovascular diseases**

Ischemic heart disease, Stroke

**B.3 Chronic respiratory diseases**

Chronic obstructive pulmonary disease

**B.6 Diabetes and kidney diseases**

Diabetes mellitus

**Table S2: Number of YLD related to smoking, by age and disease, men**

|                                           | 30-34 | 35-39 | 40-44 | 45-49 | 50-54 | 55-59 | 60-64 | 65-69 |
|-------------------------------------------|-------|-------|-------|-------|-------|-------|-------|-------|
| <b>Bahrain</b>                            |       |       |       |       |       |       |       |       |
| <i>All causes</i>                         | 368.9 | 599.1 | 736.4 | 638.0 | 537.5 | 512.8 | 397.2 | 211.8 |
| <i>A. Communicable diseases</i>           | 2.5   | 2.5   | 2.2   | 1.5   | 1.0   | 0.8   | 0.6   | 0.4   |
| A.1 Respiratory infections & tuberculosis | 2.5   | 2.5   | 2.2   | 1.5   | 1.0   | 0.8   | 0.6   | 0.4   |
| Tuberculosis                              | 1.2   | 1.2   | 1.1   | 0.7   | 0.5   | 0.4   | 0.3   | 0.2   |
| Lower respiratory infections              | 1.3   | 1.3   | 1.1   | 0.8   | 0.5   | 0.4   | 0.3   | 0.2   |
| <i>B. Non-communicable diseases</i>       | 366.3 | 596.5 | 729.1 | 631.6 | 532.6 | 508.0 | 393.6 | 209.7 |
| B.1 Neoplasms                             | 0.4   | 0.8   | 1.4   | 2.1   | 3.6   | 5.1   | 7.5   | 4.8   |
| Esophageal cancer                         | 0.0   | 0.0   | 0.0   | 0.1   | 0.1   | 0.1   | 0.1   | 0.1   |
| Stomach cancer                            | 0.0   | 0.0   | 0.0   | 0.0   | 0.1   | 0.1   | 0.1   | 0.1   |
| Liver cancer                              | 0.0   | 0.0   | 0.0   | 0.0   | 0.1   | 0.1   | 0.1   | 0.1   |
| Larynx cancer                             | 0.0   | 0.0   | 0.1   | 0.1   | 0.3   | 0.4   | 0.6   | 0.3   |
| Tracheal, bronchus, and lung cancer       | 0.0   | 0.1   | 0.2   | 0.4   | 0.7   | 1.1   | 1.8   | 1.3   |
| Prostate cancer                           | 0.0   | 0.1   | 0.1   | 0.1   | 0.3   | 0.5   | 0.9   | 0.6   |
| Colon and rectum cancer                   | 0.0   | 0.1   | 0.2   | 0.3   | 0.5   | 0.6   | 0.8   | 0.5   |
| Lip and oral cavity cancer                | 0.0   | 0.1   | 0.1   | 0.1   | 0.2   | 0.3   | 0.3   | 0.2   |
| Nasopharynx cancer                        | 0.0   | 0.0   | 0.1   | 0.1   | 0.0   | 0.0   | 0.0   | 0.0   |
| Other pharynx cancer                      | 0.0   | 0.0   | 0.0   | 0.0   | 0.1   | 0.1   | 0.1   | 0.0   |
| Pancreatic cancer                         | 0.0   | 0.0   | 0.0   | 0.0   | 0.1   | 0.1   | 0.1   | 0.1   |
| Kidney cancer                             | 0.0   | 0.0   | 0.1   | 0.1   | 0.2   | 0.2   | 0.2   | 0.1   |
| Bladder cancer                            | 0.1   | 0.2   | 0.4   | 0.5   | 0.9   | 1.1   | 1.9   | 1.2   |
| Leukemia                                  | 0.1   | 0.1   | 0.1   | 0.2   | 0.2   | 0.3   | 0.4   | 0.2   |
| B.2 Cardiovascular diseases               | 18.8  | 36.6  | 59.1  | 68.8  | 72.6  | 68.5  | 59.1  | 28.6  |
| Ischemic heart disease                    | 7.1   | 16.4  | 29.6  | 35.1  | 34.9  | 29.3  | 24.0  | 11.7  |
| Stroke                                    | 10.8  | 18.9  | 27.7  | 31.7  | 35.1  | 34.3  | 29.9  | 13.1  |
| Atrial fibrillation and flutter           | 1.0   | 1.4   | 1.7   | 1.9   | 1.8   | 2.6   | 2.2   | 1.7   |
| Peripheral artery disease                 | -     | -     | 0.0   | 0.1   | 0.8   | 2.4   | 2.9   | 2.1   |
| B.3 Chronic respiratory diseases          | 46.8  | 94.1  | 131.8 | 134.7 | 128.8 | 136.8 | 110.0 | 63.8  |
| Chronic obstructive pulmonary disease     | 25.4  | 65.7  | 103.7 | 113.0 | 111.9 | 122.0 | 99.4  | 58.2  |
| Asthma                                    | 21.4  | 28.4  | 28.1  | 21.7  | 16.8  | 14.9  | 10.6  | 5.6   |
| B.4 Digestive diseases                    | 5.6   | 8.0   | 8.0   | 5.9   | 4.0   | 2.7   | 1.6   | 0.8   |
| B.5 Neurological disorders                | 0.9   | 1.2   | 1.4   | 1.6   | 2.1   | 3.0   | 4.3   | 4.6   |
| B.6 Diabetes mellitus                     | 52.2  | 85.5  | 121.2 | 126.5 | 114.5 | 124.4 | 90.6  | 46.0  |
| B.7 Musculoskeletal disorders             | 240.5 | 367.4 | 401.3 | 285.8 | 199.6 | 157.6 | 110.2 | 53.5  |
| Rheumatoid arthritis                      | 2.0   | 3.0   | 3.8   | 3.6   | 3.0   | 3.0   | 2.1   | 1.0   |
| Low back pain                             | 238.5 | 364.4 | 397.5 | 282.3 | 196.6 | 154.6 | 108.2 | 52.5  |
| B.8 Sense organ diseases                  | 1.1   | 2.9   | 4.9   | 6.1   | 7.5   | 9.9   | 10.3  | 7.6   |
| <i>C. Injuries</i>                        | -     | -     | 5.1   | 4.9   | 3.9   | 4.0   | 3.0   | 1.7   |
| C.1 Transport injuries                    | -     | -     | 2.4   | 1.9   | 1.5   | 1.5   | 0.9   | 0.5   |
| C.2 Unintentional injuries                | -     | -     | 2.7   | 3.0   | 2.3   | 2.4   | 2.0   | 1.2   |
| C.3 Self-harm & interpersonal violence    | -     | -     | 0.1   | 0.1   | 0.0   | 0.0   | 0.0   | 0.0   |

**Table S2: Number of YLD related to smoking, by age and disease, men (continued)**

|                                           | 30-34   | 35-39   | 40-44   | 45-49   | 50-54   | 55-59   | 60-64 | 65-69 |
|-------------------------------------------|---------|---------|---------|---------|---------|---------|-------|-------|
| <b>Kuwait</b>                             |         |         |         |         |         |         |       |       |
| <i>All causes</i>                         | 1,741.4 | 2,238.6 | 2,252.0 | 2,071.7 | 1,540.6 | 1,016.5 | 789.9 | 525.2 |
| <i>A. Communicable diseases</i>           | 10.8    | 8.9     | 7.0     | 5.7     | 3.8     | 2.1     | 1.5   | 1.2   |
| A.1 Respiratory infections & tuberculosis | 10.8    | 8.9     | 7.0     | 5.7     | 3.8     | 2.1     | 1.5   | 1.2   |
| Tuberculosis                              | 4.6     | 3.8     | 3.3     | 2.6     | 1.6     | 0.9     | 0.6   | 0.4   |
| Lower respiratory infections              | 6.2     | 5.1     | 3.7     | 3.1     | 2.2     | 1.2     | 0.9   | 0.7   |
| <i>B. Non-communicable diseases</i>       | 1,730.5 | 2,229.7 | 2,222.9 | 2,043.7 | 1,522.7 | 1,003.8 | 780.4 | 518.0 |
| B.1 Neoplasms                             | 1.9     | 4.4     | 5.3     | 8.4     | 11.5    | 12.1    | 14.3  | 12.0  |
| Esophageal cancer                         | 0.0     | 0.1     | 0.1     | 0.2     | 0.2     | 0.3     | 0.2   | 0.1   |
| Stomach cancer                            | 0.0     | 0.1     | 0.1     | 0.2     | 0.2     | 0.2     | 0.2   | 0.2   |
| Liver cancer                              | 0.0     | 0.0     | 0.1     | 0.2     | 0.3     | 0.4     | 0.5   | 0.3   |
| Larynx cancer                             | 0.1     | 0.3     | 0.4     | 0.5     | 0.7     | 0.9     | 1.1   | 0.7   |
| Tracheal, bronchus, and lung cancer       | 0.1     | 0.3     | 0.6     | 1.2     | 1.9     | 2.3     | 2.5   | 2.3   |
| Prostate cancer                           | 0.3     | 0.4     | 0.3     | 0.7     | 1.5     | 1.6     | 2.4   | 2.2   |
| Colon and rectum cancer                   | 0.2     | 0.4     | 0.8     | 1.2     | 1.6     | 1.7     | 1.8   | 1.3   |
| Lip and oral cavity cancer                | 0.1     | 0.3     | 0.2     | 0.3     | 0.4     | 0.3     | 0.3   | 0.2   |
| Nasopharynx cancer                        | 0.0     | 0.1     | 0.2     | 0.2     | 0.2     | 0.1     | 0.1   | 0.0   |
| Other pharynx cancer                      | 0.0     | 0.1     | 0.1     | 0.1     | 0.2     | 0.1     | 0.2   | 0.1   |
| Pancreatic cancer                         | 0.0     | 0.0     | 0.1     | 0.2     | 0.2     | 0.3     | 0.2   | 0.2   |
| Kidney cancer                             | 0.0     | 0.1     | 0.2     | 0.3     | 0.4     | 0.5     | 0.4   | 0.3   |
| Bladder cancer                            | 0.6     | 1.8     | 1.5     | 2.4     | 2.7     | 2.9     | 3.5   | 3.4   |
| Leukemia                                  | 0.3     | 0.5     | 0.5     | 0.7     | 0.9     | 0.7     | 1.0   | 0.7   |
| B.2 Cardiovascular diseases               | 86.5    | 135.5   | 181.2   | 230.6   | 226.9   | 156.0   | 138.2 | 85.8  |
| Ischemic heart disease                    | 29.2    | 55.6    | 84.9    | 108.8   | 101.0   | 63.1    | 53.4  | 32.9  |
| Stroke                                    | 52.5    | 74.5    | 90.5    | 115.0   | 118.4   | 82.5    | 74.0  | 42.8  |
| Atrial fibrillation and flutter           | 4.8     | 5.4     | 5.8     | 6.7     | 5.5     | 5.9     | 5.0   | 4.8   |
| Peripheral artery disease                 | -       | -       | 0.0     | 0.2     | 2.0     | 4.4     | 5.8   | 5.4   |
| B.3 Chronic respiratory diseases          | 230.2   | 335.4   | 369.2   | 394.3   | 340.1   | 249.2   | 197.7 | 138.2 |
| Chronic obstructive pulmonary disease     | 108.3   | 207.4   | 263.0   | 305.1   | 275.1   | 209.3   | 169.2 | 119.7 |
| Asthma                                    | 121.8   | 128.1   | 106.2   | 89.2    | 65.0    | 39.8    | 28.6  | 18.5  |
| B.4 Digestive diseases                    | 23.8    | 27.1    | 22.9    | 18.3    | 11.8    | 6.1     | 3.2   | 1.7   |
| B.5 Neurological disorders                | 4.2     | 4.6     | 4.1     | 5.0     | 6.4     | 7.1     | 10.7  | 14.5  |
| B.6 Diabetes mellitus                     | 280.9   | 364.3   | 385.3   | 386.3   | 263.9   | 193.1   | 134.6 | 84.5  |
| B.7 Musculoskeletal disorders             | 1,097.9 | 1,346.2 | 1,237.1 | 975.7   | 633.7   | 354.9   | 255.7 | 157.7 |
| Rheumatoid arthritis                      | 12.3    | 15.3    | 16.1    | 16.6    | 11.7    | 8.4     | 6.0   | 3.7   |
| Low back pain                             | 1,085.5 | 1,330.9 | 1,221.0 | 959.2   | 622.0   | 346.4   | 249.7 | 154.1 |
| B.8 Sense organ diseases                  | 5.3     | 12.2    | 17.8    | 25.0    | 28.4    | 25.3    | 26.1  | 23.6  |
| <i>C. Injuries</i>                        | -       | -       | 22.2    | 22.3    | 14.2    | 10.7    | 8.0   | 6.0   |
| C.1 Transport injuries                    | -       | -       | 10.6    | 9.0     | 5.8     | 4.0     | 2.5   | 1.8   |
| C.2 Unintentional injuries                | -       | -       | 11.3    | 13.1    | 8.2     | 6.6     | 5.4   | 4.1   |
| C.3 Self-harm & interpersonal violence    | -       | -       | 0.3     | 0.2     | 0.1     | 0.1     | 0.1   | 0.0   |

**Table S2: Number of YLD related to smoking, by age and disease, men (continued)**

|                                           | 30-34   | 35-39   | 40-44   | 45-49   | 50-54   | 55-59 | 60-64 | 65-69 |
|-------------------------------------------|---------|---------|---------|---------|---------|-------|-------|-------|
| <b>Oman</b>                               |         |         |         |         |         |       |       |       |
| <i>All causes</i>                         | 1,272.9 | 1,481.9 | 1,432.4 | 1,267.4 | 1,029.6 | 901.4 | 558.1 | 320.5 |
| <i>A. Communicable diseases</i>           | 9.0     | 6.4     | 4.4     | 3.5     | 2.5     | 1.9   | 1.1   | 0.7   |
| A.1 Respiratory infections & tuberculosis | 9.0     | 6.4     | 4.4     | 3.5     | 2.5     | 1.9   | 1.1   | 0.7   |
| Tuberculosis                              | 3.6     | 2.5     | 1.7     | 1.3     | 0.9     | 0.7   | 0.4   | 0.2   |
| Lower respiratory infections              | 5.4     | 3.9     | 2.7     | 2.2     | 1.6     | 1.2   | 0.7   | 0.4   |
| <i>B. Non-communicable diseases</i>       | 1,263.9 | 1,475.5 | 1,416.7 | 1,253.7 | 1,018.4 | 892.3 | 553.0 | 317.5 |
| B.1 Neoplasms                             | 1.3     | 2.5     | 3.6     | 6.3     | 9.1     | 12.9  | 11.1  | 8.0   |
| Esophageal cancer                         | 0.0     | 0.1     | 0.2     | 0.3     | 0.5     | 0.6   | 0.5   | 0.3   |
| Stomach cancer                            | 0.0     | 0.1     | 0.1     | 0.2     | 0.3     | 0.5   | 0.6   | 0.4   |
| Liver cancer                              | 0.0     | 0.0     | 0.1     | 0.2     | 0.3     | 0.5   | 0.4   | 0.2   |
| Larynx cancer                             | 0.1     | 0.2     | 0.4     | 0.9     | 1.2     | 1.8   | 1.2   | 0.7   |
| Tracheal, bronchus, and lung cancer       | 0.1     | 0.2     | 0.4     | 0.8     | 1.4     | 2.2   | 2.1   | 1.6   |
| Prostate cancer                           | 0.1     | 0.1     | 0.1     | 0.3     | 0.7     | 1.0   | 1.3   | 1.1   |
| Colon and rectum cancer                   | 0.1     | 0.2     | 0.4     | 0.7     | 0.9     | 1.3   | 1.1   | 0.7   |
| Lip and oral cavity cancer                | 0.1     | 0.3     | 0.4     | 0.5     | 0.7     | 0.9   | 0.6   | 0.4   |
| Nasopharynx cancer                        | 0.0     | 0.1     | 0.1     | 0.1     | 0.1     | 0.1   | 0.1   | 0.0   |
| Other pharynx cancer                      | 0.0     | 0.0     | 0.1     | 0.2     | 0.2     | 0.3   | 0.2   | 0.1   |
| Pancreatic cancer                         | 0.0     | 0.0     | 0.0     | 0.1     | 0.1     | 0.2   | 0.2   | 0.1   |
| Kidney cancer                             | 0.0     | 0.1     | 0.1     | 0.2     | 0.3     | 0.4   | 0.3   | 0.2   |
| Bladder cancer                            | 0.4     | 0.6     | 0.7     | 1.2     | 1.9     | 2.3   | 2.0   | 1.5   |
| Leukemia                                  | 0.3     | 0.3     | 0.4     | 0.4     | 0.5     | 0.7   | 0.7   | 0.5   |
| B.2 Cardiovascular diseases               | 78.9    | 109.6   | 139.0   | 167.4   | 169.4   | 154.2 | 108.1 | 55.2  |
| Ischemic heart disease                    | 26.9    | 46.8    | 69.7    | 85.8    | 82.3    | 67.2  | 45.6  | 24.3  |
| Stroke                                    | 47.9    | 58.9    | 65.6    | 77.5    | 81.6    | 77.7  | 54.9  | 25.0  |
| Atrial fibrillation and flutter           | 4.1     | 3.9     | 3.6     | 3.9     | 3.8     | 4.6   | 2.9   | 2.2   |
| Peripheral artery disease                 | -       | -       | 0.0     | 0.1     | 1.7     | 4.7   | 4.7   | 3.7   |
| B.3 Chronic respiratory diseases          | 138.3   | 195.3   | 212.4   | 215.5   | 190.0   | 187.7 | 121.8 | 77.0  |
| Chronic obstructive pulmonary disease     | 68.9    | 127.9   | 158.7   | 173.0   | 158.5   | 160.2 | 105.6 | 67.7  |
| Asthma                                    | 69.4    | 67.4    | 53.8    | 42.5    | 31.5    | 27.5  | 16.2  | 9.3   |
| B.4 Digestive diseases                    | 21.9    | 22.0    | 17.8    | 12.8    | 8.3     | 5.8   | 2.6   | 1.3   |
| B.5 Neurological disorders                | 3.2     | 2.8     | 2.3     | 3.1     | 4.1     | 5.7   | 6.9   | 8.2   |
| B.6 Diabetes mellitus                     | 211.3   | 244.2   | 247.7   | 244.9   | 219.5   | 185.1 | 97.2  | 48.0  |
| B.7 Musculoskeletal disorders             | 794.7   | 873.7   | 761.0   | 561.8   | 370.9   | 283.9 | 159.7 | 84.6  |
| Rheumatoid arthritis                      | 7.9     | 8.3     | 7.8     | 7.3     | 6.2     | 5.1   | 2.7   | 1.4   |
| Low back pain                             | 786.8   | 865.3   | 753.3   | 554.5   | 364.7   | 278.8 | 157.0 | 83.2  |
| B.8 Sense organ diseases                  | 14.2    | 25.4    | 32.9    | 42.0    | 47.1    | 56.9  | 45.6  | 35.3  |
| <i>C. Injuries</i>                        | -       | -       | 11.2    | 10.3    | 8.7     | 7.2   | 4.0   | 2.3   |
| C.1 Transport injuries                    | -       | -       | 6.8     | 5.5     | 4.7     | 3.6   | 1.7   | 0.9   |
| C.2 Unintentional injuries                | -       | -       | 4.3     | 4.7     | 3.9     | 3.5   | 2.2   | 1.3   |
| C.3 Self-harm & interpersonal violence    | -       | -       | 0.1     | 0.1     | 0.1     | 0.1   | 0.0   | 0.0   |

**Table S2: Number of YLD related to smoking, by age and disease, men (continued)**

|                                           | 30-34   | 35-39   | 40-44 | 45-49   | 50-54 | 55-59 | 60-64 | 65-69 |
|-------------------------------------------|---------|---------|-------|---------|-------|-------|-------|-------|
| <b>Qatar</b>                              |         |         |       |         |       |       |       |       |
| <i>All causes</i>                         | 1,027.7 | 1,132.9 | 964.0 | 1,261.9 | 733.7 | 616.7 | 379.5 | 176.3 |
| <i>A. Communicable diseases</i>           | 7.2     | 4.8     | 3.0   | 2.9     | 1.4   | 1.0   | 0.6   | 0.3   |
| A.1 Respiratory infections & tuberculosis | 7.2     | 4.8     | 3.0   | 2.9     | 1.4   | 1.0   | 0.6   | 0.3   |
| Tuberculosis                              | 3.8     | 2.4     | 1.6   | 1.4     | 0.6   | 0.5   | 0.3   | 0.1   |
| Lower respiratory infections              | 3.4     | 2.3     | 1.4   | 1.6     | 0.8   | 0.5   | 0.3   | 0.1   |
| <i>B. Non-communicable diseases</i>       | 1,020.5 | 1,128.1 | 948.5 | 1,245.2 | 724.6 | 607.7 | 374.6 | 174.2 |
| B.1 Neoplasms                             | 0.7     | 1.3     | 1.6   | 4.1     | 5.5   | 7.9   | 8.0   | 5.9   |
| Esophageal cancer                         | 0.0     | 0.0     | 0.1   | 0.1     | 0.2   | 0.2   | 0.1   | 0.1   |
| Stomach cancer                            | 0.0     | 0.0     | 0.0   | 0.1     | 0.1   | 0.2   | 0.2   | 0.1   |
| Liver cancer                              | 0.0     | 0.0     | 0.0   | 0.1     | 0.2   | 0.3   | 0.3   | 0.3   |
| Larynx cancer                             | 0.1     | 0.1     | 0.1   | 0.5     | 0.6   | 0.9   | 0.7   | 0.6   |
| Tracheal, bronchus, and lung cancer       | 0.0     | 0.1     | 0.2   | 0.9     | 1.2   | 1.7   | 2.0   | 1.2   |
| Prostate cancer                           | 0.1     | 0.1     | 0.1   | 0.4     | 0.7   | 1.0   | 1.5   | 1.2   |
| Colon and rectum cancer                   | 0.1     | 0.1     | 0.2   | 0.5     | 0.6   | 0.8   | 0.9   | 0.7   |
| Lip and oral cavity cancer                | 0.0     | 0.1     | 0.1   | 0.1     | 0.1   | 0.3   | 0.2   | 0.1   |
| Nasopharynx cancer                        | 0.0     | 0.0     | 0.0   | 0.1     | 0.0   | 0.0   | 0.0   | 0.0   |
| Other pharynx cancer                      | 0.0     | 0.0     | 0.0   | 0.0     | 0.1   | 0.1   | 0.1   | 0.1   |
| Pancreatic cancer                         | 0.0     | 0.0     | 0.0   | 0.1     | 0.1   | 0.1   | 0.2   | 0.1   |
| Kidney cancer                             | 0.0     | 0.0     | 0.1   | 0.1     | 0.2   | 0.2   | 0.2   | 0.1   |
| Bladder cancer                            | 0.2     | 0.5     | 0.4   | 0.7     | 1.0   | 1.6   | 1.2   | 0.9   |
| Leukemia                                  | 0.1     | 0.1     | 0.2   | 0.3     | 0.4   | 0.5   | 0.4   | 0.3   |
| B.2 Cardiovascular diseases               | 49.3    | 65.1    | 70.4  | 134.4   | 100.8 | 82.6  | 58.5  | 25.3  |
| Ischemic heart disease                    | 15.9    | 25.1    | 31.2  | 61.4    | 43.8  | 31.7  | 21.6  | 9.7   |
| Stroke                                    | 30.8    | 37.5    | 36.7  | 69.5    | 53.7  | 45.2  | 32.4  | 12.9  |
| Atrial fibrillation and flutter           | 2.7     | 2.5     | 2.6   | 3.3     | 2.3   | 3.3   | 2.0   | 1.1   |
| Peripheral artery disease                 | -       | -       | 0.0   | 0.1     | 1.0   | 2.5   | 2.5   | 1.7   |
| B.3 Chronic respiratory diseases          | 102.0   | 145.8   | 141.3 | 241.7   | 165.9 | 153.4 | 100.0 | 52.3  |
| Chronic obstructive pulmonary disease     | 57.4    | 104.6   | 113.4 | 206.1   | 146.7 | 139.0 | 91.8  | 48.5  |
| Asthma                                    | 44.6    | 41.2    | 27.9  | 35.6    | 19.3  | 14.4  | 8.2   | 3.8   |
| B.4 Digestive diseases                    | 22.8    | 22.0    | 15.2  | 18.1    | 8.1   | 4.7   | 2.1   | 0.8   |
| B.5 Neurological disorders                | 1.8     | 2.1     | 1.4   | 2.5     | 2.7   | 3.4   | 3.9   | 3.7   |
| B.6 Diabetes mellitus                     | 150.3   | 167.2   | 181.0 | 216.9   | 138.6 | 148.6 | 81.3  | 31.5  |
| B.7 Musculoskeletal disorders             | 691.0   | 719.9   | 532.4 | 616.4   | 293.9 | 197.2 | 112.5 | 49.3  |
| Rheumatoid arthritis                      | 5.2     | 5.5     | 5.5   | 6.1     | 3.8   | 3.6   | 1.9   | 0.7   |
| Low back pain                             | 685.8   | 714.4   | 526.8 | 610.3   | 290.2 | 193.5 | 110.6 | 48.6  |
| B.8 Sense organ diseases                  | 2.6     | 4.7     | 5.3   | 11.1    | 9.1   | 9.9   | 8.3   | 5.4   |
| <i>C. Injuries</i>                        | -       | -       | 12.6  | 13.7    | 7.7   | 8.0   | 4.4   | 1.8   |
| C.1 Transport injuries                    | -       | -       | 6.2   | 5.7     | 3.3   | 3.2   | 1.5   | 0.6   |
| C.2 Unintentional injuries                | -       | -       | 6.2   | 7.9     | 4.3   | 4.7   | 2.9   | 1.2   |
| C.3 Self-harm & interpersonal violence    | -       | -       | 0.1   | 0.1     | 0.1   | 0.1   | 0.0   | 0.0   |

**Table S2: Number of YLD related to smoking, by age and disease, men (continued)**

|                                           | 30-34   | 35-39    | 40-44    | 45-49   | 50-54   | 55-59   | 60-64   | 65-69   |
|-------------------------------------------|---------|----------|----------|---------|---------|---------|---------|---------|
| <b>Saudi Arabia</b>                       |         |          |          |         |         |         |         |         |
| <i>All causes</i>                         | 7,467.2 | 10,263.2 | 10,409.2 | 8,443.9 | 6,580.6 | 4,772.7 | 3,907.1 | 2,845.0 |
| <i>A. Communicable diseases</i>           | 56.7    | 54.4     | 44.1     | 33.1    | 21.6    | 14.9    | 11.8    | 7.8     |
| A.1 Respiratory infections & tuberculosis | 56.7    | 54.4     | 44.1     | 33.1    | 21.6    | 14.9    | 11.8    | 7.8     |
| Tuberculosis                              | 28.4    | 28.0     | 23.5     | 17.8    | 10.8    | 7.9     | 7.0     | 4.1     |
| Lower respiratory infections              | 28.3    | 26.4     | 20.6     | 15.3    | 10.8    | 7.0     | 4.8     | 3.7     |
| <i>B. Non-communicable diseases</i>       | 7,410.5 | 10,208.8 | 10,228.5 | 8,282.1 | 6,466.7 | 4,684.8 | 3,823.9 | 2,799.0 |
| B.1 Neoplasms                             | 8.6     | 21.0     | 35.6     | 55.8    | 74.3    | 89.6    | 87.3    | 87.8    |
| Esophageal cancer                         | 0.2     | 0.5      | 1.1      | 1.7     | 2.1     | 2.4     | 2.7     | 1.7     |
| Stomach cancer                            | 0.2     | 0.4      | 0.6      | 1.0     | 1.5     | 1.7     | 1.8     | 1.9     |
| Liver cancer                              | 0.1     | 0.2      | 0.4      | 1.0     | 1.6     | 2.6     | 3.3     | 3.4     |
| Larynx cancer                             | 0.6     | 1.9      | 3.8      | 6.2     | 7.8     | 10.0    | 7.5     | 5.5     |
| Tracheal, bronchus, and lung cancer       | 0.4     | 1.4      | 3.5      | 7.8     | 11.6    | 15.4    | 18.2    | 20.3    |
| Prostate cancer                           | 1.3     | 1.7      | 1.8      | 3.7     | 7.1     | 9.8     | 13.1    | 16.1    |
| Colon and rectum cancer                   | 0.9     | 2.2      | 4.6      | 8.0     | 11.2    | 12.6    | 12.0    | 12.5    |
| Lip and oral cavity cancer                | 0.7     | 2.1      | 2.8      | 3.6     | 4.0     | 4.4     | 3.9     | 3.8     |
| Nasopharynx cancer                        | 0.7     | 2.1      | 4.3      | 4.9     | 3.3     | 2.1     | 1.6     | 1.2     |
| Other pharynx cancer                      | 0.1     | 0.3      | 0.8      | 1.0     | 1.4     | 1.6     | 1.3     | 1.0     |
| Pancreatic cancer                         | 0.1     | 0.2      | 0.5      | 0.9     | 1.3     | 1.6     | 1.5     | 1.6     |
| Kidney cancer                             | 0.2     | 0.6      | 1.1      | 1.9     | 2.4     | 2.5     | 2.1     | 2.3     |
| Bladder cancer                            | 1.9     | 4.7      | 7.4      | 10.2    | 13.9    | 17.6    | 13.2    | 10.9    |
| Leukemia                                  | 1.4     | 2.6      | 3.1      | 3.9     | 4.9     | 5.3     | 5.0     | 5.6     |
| B.2 Cardiovascular diseases               | 414.9   | 705.3    | 948.4    | 1,069.4 | 1,090.8 | 807.2   | 717.5   | 502.3   |
| Ischemic heart disease                    | 150.7   | 305.2    | 464.6    | 530.0   | 508.2   | 337.7   | 287.4   | 206.2   |
| Stroke                                    | 247.3   | 378.9    | 460.9    | 514.9   | 553.7   | 427.9   | 381.1   | 251.3   |
| Atrial fibrillation and flutter           | 16.9    | 21.2     | 22.7     | 23.9    | 20.4    | 22.6    | 24.2    | 17.1    |
| Peripheral artery disease                 | -       | -        | 0.2      | 0.7     | 8.4     | 19.1    | 24.7    | 27.7    |
| B.3 Chronic respiratory diseases          | 560.5   | 973.8    | 1,217.5  | 1,280.3 | 1,252.1 | 1,109.3 | 956.9   | 817.0   |
| Chronic obstructive pulmonary disease     | 290.1   | 655.6    | 946.1    | 1,083.1 | 1,109.3 | 1,014.0 | 889.0   | 764.5   |
| Asthma                                    | 270.4   | 318.2    | 271.5    | 197.2   | 142.8   | 95.3    | 67.9    | 52.5    |
| B.4 Digestive diseases                    | 118.4   | 144.0    | 122.5    | 84.7    | 55.1    | 30.2    | 16.6    | 10.6    |
| B.5 Neurological disorders                | 14.5    | 18.4     | 17.5     | 19.1    | 24.5    | 29.3    | 42.5    | 66.7    |
| B.6 Diabetes mellitus                     | 1,071.4 | 1,463.0  | 1,539.3  | 1,406.6 | 1,031.8 | 781.9   | 644.4   | 298.3   |
| B.7 Musculoskeletal disorders             | 5,195.1 | 6,826.1  | 6,268.3  | 4,275.4 | 2,838.6 | 1,742.5 | 1,261.9 | 910.7   |
| Rheumatoid arthritis                      | 33.7    | 46.0     | 48.1     | 43.2    | 31.6    | 24.4    | 20.1    | 9.4     |
| Low back pain                             | 5,161.4 | 6,780.1  | 6,220.2  | 4,232.2 | 2,807.0 | 1,718.1 | 1,241.8 | 901.3   |
| B.8 Sense organ diseases                  | 27.1    | 57.3     | 79.3     | 90.9    | 99.5    | 94.7    | 96.9    | 105.7   |
| <i>C. Injuries</i>                        | -       | -        | 136.6    | 128.7   | 92.3    | 72.9    | 71.3    | 38.2    |
| C.1 Transport injuries                    | -       | -        | 70.8     | 56.0    | 40.1    | 28.3    | 23.0    | 11.2    |
| C.2 Unintentional injuries                | -       | -        | 64.2     | 71.5    | 51.4    | 43.9    | 47.9    | 26.8    |
| C.3 Self-harm & interpersonal violence    | -       | -        | 1.6      | 1.2     | 0.8     | 0.6     | 0.5     | 0.2     |

**Table S2: Number of YLD related to smoking, by age and disease, men (continued)**

|                                           | 30-34   | 35-39   | 40-44   | 45-49   | 50-54   | 55-59   | 60-64   | 65-69 |
|-------------------------------------------|---------|---------|---------|---------|---------|---------|---------|-------|
| <b>UAE</b>                                |         |         |         |         |         |         |         |       |
| <i>All causes</i>                         | 5,088.4 | 8,840.4 | 8,268.7 | 6,050.6 | 3,736.1 | 1,931.3 | 1,568.9 | 421.4 |
| <i>A. Communicable diseases</i>           | 25.9    | 27.9    | 19.5    | 12.3    | 6.7     | 3.3     | 2.4     | 0.6   |
| A.1 Respiratory infections & tuberculosis | 25.9    | 27.9    | 19.5    | 12.3    | 6.7     | 3.3     | 2.4     | 0.6   |
| Tuberculosis                              | 11.5    | 12.8    | 8.7     | 5.2     | 2.8     | 1.5     | 1.0     | 0.2   |
| Lower respiratory infections              | 14.4    | 15.1    | 10.8    | 7.2     | 3.9     | 1.8     | 1.4     | 0.4   |
| <i>B. Non-communicable diseases</i>       | 5,062.5 | 8,812.4 | 8,144.5 | 5,964.8 | 3,681.6 | 1,901.2 | 1,550.1 | 415.9 |
| B.1 Neoplasms                             | 7.6     | 23.5    | 33.7    | 45.3    | 50.2    | 43.8    | 54.8    | 15.5  |
| Esophageal cancer                         | 0.4     | 1.6     | 3.2     | 4.1     | 5.0     | 4.4     | 4.1     | 1.1   |
| Stomach cancer                            | 0.1     | 0.3     | 0.5     | 0.7     | 0.8     | 0.9     | 1.6     | 0.5   |
| Liver cancer                              | 0.0     | 0.2     | 0.5     | 0.8     | 0.8     | 0.9     | 1.2     | 0.3   |
| Larynx cancer                             | 1.3     | 4.2     | 6.4     | 9.3     | 10.1    | 7.4     | 7.2     | 1.8   |
| Tracheal, bronchus, and lung cancer       | 0.2     | 1.2     | 2.7     | 4.5     | 5.7     | 7.1     | 12.1    | 3.2   |
| Prostate cancer                           | 0.8     | 1.1     | 1.1     | 1.6     | 2.6     | 2.4     | 4.3     | 1.4   |
| Colon and rectum cancer                   | 0.3     | 1.4     | 2.6     | 3.4     | 3.3     | 3.9     | 5.2     | 1.5   |
| Lip and oral cavity cancer                | 0.4     | 1.9     | 2.0     | 2.2     | 1.9     | 1.7     | 1.9     | 0.5   |
| Nasopharynx cancer                        | 0.2     | 0.8     | 1.2     | 1.1     | 0.5     | 0.3     | 0.3     | 0.1   |
| Other pharynx cancer                      | 0.1     | 0.3     | 0.6     | 0.8     | 0.9     | 0.7     | 0.9     | 0.2   |
| Pancreatic cancer                         | 0.0     | 0.3     | 0.6     | 0.9     | 1.0     | 0.9     | 1.2     | 0.3   |
| Kidney cancer                             | 0.1     | 0.8     | 1.3     | 1.8     | 1.6     | 1.2     | 1.3     | 0.3   |
| Bladder cancer                            | 3.1     | 7.8     | 9.3     | 12.1    | 14.4    | 9.9     | 10.5    | 3.1   |
| Leukemia                                  | 0.6     | 1.6     | 2.0     | 2.0     | 1.8     | 2.0     | 3.1     | 1.0   |
| B.2 Cardiovascular diseases               | 259.4   | 513.5   | 638.9   | 616.5   | 491.0   | 250.1   | 246.1   | 59.2  |
| Ischemic heart disease                    | 66.8    | 162.9   | 234.1   | 227.0   | 166.2   | 71.9    | 66.7    | 16.6  |
| Stroke                                    | 181.2   | 333.8   | 390.3   | 375.9   | 310.8   | 164.0   | 164.4   | 36.6  |
| Atrial fibrillation and flutter           | 11.3    | 16.7    | 14.3    | 13.0    | 9.7     | 8.0     | 6.3     | 2.6   |
| Peripheral artery disease                 | -       | -       | 0.2     | 0.5     | 4.4     | 6.2     | 8.7     | 3.4   |
| B.3 Chronic respiratory diseases          | 816.5   | 1,836.1 | 1,999.8 | 1,734.6 | 1,138.3 | 635.1   | 513.6   | 137.5 |
| Chronic obstructive pulmonary disease     | 432.0   | 1,294.7 | 1,560.1 | 1,453.5 | 978.6   | 563.4   | 456.5   | 122.8 |
| Asthma                                    | 384.5   | 541.3   | 439.7   | 281.1   | 159.7   | 71.7    | 57.1    | 14.7  |
| B.4 Digestive diseases                    | 66.7    | 98.4    | 76.9    | 45.2    | 22.2    | 8.4     | 6.0     | 1.3   |
| B.5 Neurological disorders                | 23.8    | 26.8    | 17.9    | 14.8    | 13.6    | 8.9     | 13.7    | 7.4   |
| B.6 Diabetes mellitus                     | 655.9   | 1,152.9 | 1,055.2 | 905.8   | 626.8   | 371.0   | 228.9   | 60.7  |
| B.7 Musculoskeletal disorders             | 3,218.5 | 5,121.6 | 4,268.0 | 2,547.4 | 1,290.7 | 552.6   | 451.0   | 121.2 |
| Rheumatoid arthritis                      | 21.7    | 35.4    | 28.8    | 23.2    | 14.0    | 8.1     | 5.0     | 1.4   |
| Low back pain                             | 3,196.8 | 5,086.2 | 4,239.2 | 2,524.1 | 1,276.7 | 544.5   | 446.0   | 119.9 |
| B.8 Sense organ diseases                  | 14.1    | 39.7    | 54.3    | 55.2    | 48.9    | 31.2    | 36.0    | 13.0  |
| <i>C. Injuries</i>                        | -       | -       | 104.7   | 73.5    | 47.8    | 26.8    | 16.3    | 4.8   |
| C.1 Transport injuries                    | -       | -       | 52.7    | 31.6    | 21.0    | 10.9    | 5.6     | 1.6   |
| C.2 Unintentional injuries                | -       | -       | 50.9    | 41.3    | 26.4    | 15.7    | 10.6    | 3.2   |
| C.3 Self-harm & interpersonal violence    | -       | -       | 1.1     | 0.6     | 0.4     | 0.2     | 0.1     | 0.0   |

Source: GBD Study, IHME

**Table S3: Number of YLD related to smoking, by age and disease, women**

|                                           | 30-34 | 35-39 | 40-44 | 45-49 | 50-54 | 55-59 | 60-64 | 65-69 |
|-------------------------------------------|-------|-------|-------|-------|-------|-------|-------|-------|
| <b><u>Bahrain</u></b>                     |       |       |       |       |       |       |       |       |
| <i>All causes</i>                         | 22.9  | 33.3  | 35.7  | 46.0  | 57.0  | 63.7  | 62.6  | 46.1  |
| <i>A. Communicable diseases</i>           | 0.1   | 0.1   | 0.1   | 0.1   | 0.1   | 0.1   | 0.1   | 0.1   |
| A.1 Respiratory infections & tuberculosis | 0.1   | 0.1   | 0.1   | 0.1   | 0.1   | 0.1   | 0.1   | 0.1   |
| Tuberculosis                              | 0.0   | 0.0   | 0.0   | 0.0   | 0.0   | 0.0   | 0.0   | 0.0   |
| Lower respiratory infections              | 0.1   | 0.1   | 0.1   | 0.1   | 0.1   | 0.0   | 0.0   | 0.0   |
| <i>B. Non-communicable diseases</i>       | 22.8  | 33.2  | 35.2  | 45.4  | 56.1  | 62.7  | 61.6  | 45.2  |
| B.1 Neoplasms                             | 0.0   | 0.1   | 0.1   | 0.2   | 0.4   | 0.6   | 0.6   | 0.5   |
| Esophageal cancer                         | 0.0   | 0.0   | 0.0   | 0.0   | 0.0   | 0.0   | 0.0   | 0.0   |
| Stomach cancer                            | 0.0   | 0.0   | 0.0   | 0.0   | 0.0   | 0.0   | 0.0   | 0.0   |
| Liver cancer                              | 0.0   | 0.0   | 0.0   | 0.0   | 0.0   | 0.0   | 0.0   | 0.0   |
| Larynx cancer                             | 0.0   | 0.0   | 0.0   | 0.0   | 0.0   | 0.0   | 0.0   | 0.0   |
| Tracheal, bronchus, and lung cancer       | 0.0   | 0.0   | 0.0   | 0.0   | 0.0   | 0.1   | 0.1   | 0.1   |
| Breast cancer                             | 0.0   | 0.0   | 0.0   | 0.1   | 0.1   | 0.2   | 0.2   | 0.1   |
| Cervical cancer                           | 0.0   | 0.0   | 0.1   | 0.1   | 0.1   | 0.1   | 0.1   | 0.0   |
| Colon and rectum cancer                   | 0.0   | 0.0   | 0.0   | 0.0   | 0.0   | 0.0   | 0.0   | 0.0   |
| Lip and oral cavity cancer                | 0.0   | 0.0   | 0.0   | 0.0   | 0.0   | 0.0   | 0.0   | 0.0   |
| Nasopharynx cancer                        | 0.0   | 0.0   | 0.0   | 0.0   | 0.0   | 0.0   | 0.0   | 0.0   |
| Other pharynx cancer                      | 0.0   | 0.0   | 0.0   | 0.0   | 0.0   | 0.0   | 0.0   | 0.0   |
| Pancreatic cancer                         | 0.0   | 0.0   | 0.0   | 0.0   | 0.0   | 0.0   | 0.0   | 0.0   |
| Kidney cancer                             | 0.0   | 0.0   | 0.0   | 0.0   | 0.0   | 0.0   | 0.0   | 0.0   |
| Bladder cancer                            | 0.0   | 0.0   | 0.0   | 0.0   | 0.0   | 0.0   | 0.1   | 0.0   |
| Leukemia                                  | 0.0   | 0.0   | 0.0   | 0.0   | 0.0   | 0.0   | 0.0   | 0.0   |
| B.2 Cardiovascular diseases               | 1.5   | 2.5   | 3.5   | 6.0   | 9.1   | 9.8   | 11.5  | 7.8   |
| Ischemic heart disease                    | 0.4   | 0.9   | 1.4   | 2.4   | 3.5   | 3.4   | 3.9   | 2.7   |
| Stroke                                    | 1.0   | 1.6   | 2.0   | 3.4   | 5.3   | 5.9   | 6.8   | 4.4   |
| Atrial fibrillation and flutter           | 0.0   | 0.1   | 0.1   | 0.1   | 0.2   | 0.3   | 0.3   | 0.3   |
| Peripheral artery disease                 | -     | -     | 0.0   | 0.0   | 0.1   | 0.3   | 0.4   | 0.4   |
| B.3 Chronic respiratory diseases          | 3.4   | 5.5   | 6.2   | 8.2   | 10.8  | 14.0  | 14.8  | 12.4  |
| Chronic obstructive pulmonary disease     | 1.9   | 3.6   | 4.5   | 6.5   | 9.0   | 12.0  | 13.0  | 11.1  |
| Asthma                                    | 1.5   | 1.9   | 1.6   | 1.8   | 1.9   | 1.9   | 1.8   | 1.3   |
| B.4 Digestive diseases                    | 0.2   | 0.3   | 0.3   | 0.4   | 0.4   | 0.4   | 0.3   | 0.2   |
| B.5 Neurological disorders                | 0.1   | 0.2   | 0.2   | 0.2   | 0.3   | 0.4   | 0.7   | 1.0   |
| B.6 Diabetes mellitus                     | 2.4   | 3.9   | 5.3   | 8.1   | 11.6  | 14.7  | 13.2  | 9.0   |
| B.7 Musculoskeletal disorders             | 15.1  | 20.6  | 19.5  | 21.9  | 22.8  | 21.8  | 19.1  | 12.8  |
| Rheumatoid arthritis                      | 0.3   | 0.4   | 0.6   | 0.8   | 1.2   | 1.4   | 1.2   | 0.8   |
| Low back pain                             | 14.8  | 20.2  | 19.0  | 21.0  | 21.7  | 20.4  | 17.8  | 12.0  |
| B.8 Sense organ diseases                  | 0.1   | 0.2   | 0.2   | 0.4   | 0.7   | 1.0   | 1.5   | 1.6   |
| <i>C. Injuries</i>                        | -     | -     | 0.4   | 0.5   | 0.8   | 0.9   | 0.9   | 0.8   |
| C.1 Transport injuries                    | -     | -     | 0.2   | 0.2   | 0.3   | 0.3   | 0.2   | 0.2   |
| C.2 Unintentional injuries                | -     | -     | 0.2   | 0.3   | 0.5   | 0.6   | 0.7   | 0.6   |
| C.3 Self-harm & interpersonal violence    | -     | -     | -     | 0.0   | 0.0   | 0.0   | 0.0   | 0.0   |



**Table S3: Number of YLD related to smoking, by age and disease, women (continued)**

|                                           | 30-34 | 35-39 | 40-44 | 45-49 | 50-54 | 55-59 | 60-64 | 65-69 |
|-------------------------------------------|-------|-------|-------|-------|-------|-------|-------|-------|
| <b>Kuwait</b>                             |       |       |       |       |       |       |       |       |
| <i>All causes</i>                         | 162.2 | 196.9 | 221.4 | 182.5 | 155.7 | 104.1 | 102.3 | 68.3  |
| <i>A. Communicable diseases</i>           | 1.0   | 0.7   | 0.6   | 0.4   | 0.3   | 0.2   | 0.2   | 0.1   |
| A.1 Respiratory infections & tuberculosis | 1.0   | 0.7   | 0.6   | 0.4   | 0.3   | 0.2   | 0.2   | 0.1   |
| Tuberculosis                              | 0.4   | 0.3   | 0.2   | 0.2   | 0.1   | 0.1   | 0.0   | 0.0   |
| Lower respiratory infections              | 0.5   | 0.4   | 0.4   | 0.3   | 0.2   | 0.1   | 0.1   | 0.1   |
| <i>B. Non-communicable diseases</i>       | 161.3 | 196.1 | 219.1 | 180.3 | 153.9 | 102.3 | 100.9 | 67.3  |
| B.1 Neoplasms                             | 0.3   | 0.4   | 0.6   | 0.8   | 0.8   | 0.8   | 0.8   | 0.5   |
| Esophageal cancer                         | 0.0   | 0.0   | 0.0   | 0.0   | 0.0   | 0.0   | 0.0   | 0.0   |
| Stomach cancer                            | 0.0   | 0.0   | 0.0   | 0.0   | 0.0   | 0.0   | 0.0   | 0.0   |
| Liver cancer                              | 0.0   | 0.0   | 0.0   | 0.0   | 0.0   | 0.0   | 0.0   | 0.0   |
| Larynx cancer                             | 0.0   | 0.0   | 0.0   | 0.0   | 0.0   | 0.0   | 0.0   | 0.0   |
| Tracheal, bronchus, and lung cancer       | 0.0   | 0.0   | 0.0   | 0.1   | 0.1   | 0.1   | 0.1   | 0.1   |
| Breast cancer                             | 0.0   | 0.1   | 0.2   | 0.3   | 0.3   | 0.3   | 0.3   | 0.2   |
| Cervical cancer                           | 0.2   | 0.2   | 0.2   | 0.2   | 0.1   | 0.1   | 0.0   | 0.0   |
| Colon and rectum cancer                   | 0.0   | 0.0   | 0.0   | 0.0   | 0.1   | 0.1   | 0.1   | 0.1   |
| Lip and oral cavity cancer                | 0.0   | 0.0   | 0.0   | 0.0   | 0.0   | 0.0   | 0.0   | 0.0   |
| Nasopharynx cancer                        | 0.0   | 0.0   | 0.0   | 0.0   | 0.0   | 0.0   | 0.0   | 0.0   |
| Other pharynx cancer                      | 0.0   | 0.0   | 0.0   | 0.0   | 0.0   | 0.0   | 0.0   | 0.0   |
| Pancreatic cancer                         | 0.0   | 0.0   | 0.0   | 0.0   | 0.0   | 0.0   | 0.0   | 0.0   |
| Kidney cancer                             | 0.0   | 0.0   | 0.0   | 0.0   | 0.0   | 0.0   | 0.0   | 0.0   |
| Bladder cancer                            | 0.0   | 0.0   | 0.0   | 0.1   | 0.1   | 0.1   | 0.1   | 0.0   |
| Leukemia                                  | 0.0   | 0.0   | 0.0   | 0.0   | 0.0   | 0.0   | 0.0   | 0.0   |
| B.2 Cardiovascular diseases               | 10.8  | 15.8  | 23.4  | 25.9  | 28.5  | 18.3  | 22.6  | 14.2  |
| Ischemic heart disease                    | 3.0   | 5.3   | 9.0   | 10.1  | 10.6  | 6.2   | 7.4   | 4.5   |
| Stroke                                    | 7.5   | 10.1  | 14.1  | 15.3  | 17.2  | 11.2  | 14.0  | 8.5   |
| Atrial fibrillation and flutter           | 0.3   | 0.4   | 0.4   | 0.5   | 0.4   | 0.6   | 0.5   | 0.4   |
| Peripheral artery disease                 | -     | -     | 0.0   | 0.0   | 0.2   | 0.4   | 0.8   | 0.8   |
| B.3 Chronic respiratory diseases          | 21.8  | 29.5  | 35.3  | 30.4  | 28.8  | 21.0  | 22.5  | 17.1  |
| Chronic obstructive pulmonary disease     | 9.9   | 17.1  | 23.4  | 21.9  | 22.1  | 17.0  | 18.8  | 14.6  |
| Asthma                                    | 11.8  | 12.4  | 12.0  | 8.6   | 6.7   | 4.0   | 3.7   | 2.5   |
| B.4 Digestive diseases                    | 1.3   | 1.6   | 1.9   | 1.5   | 1.1   | 0.6   | 0.5   | 0.3   |
| B.5 Neurological disorders                | 0.7   | 0.7   | 0.6   | 0.7   | 0.9   | 0.8   | 1.4   | 2.0   |
| B.6 Diabetes mellitus                     | 17.8  | 21.6  | 22.6  | 22.9  | 17.9  | 16.4  | 11.3  | 5.6   |
| B.7 Musculoskeletal disorders             | 108.1 | 125.4 | 133.0 | 96.1  | 73.6  | 42.3  | 38.6  | 24.4  |
| Rheumatoid arthritis                      | 2.7   | 3.3   | 3.5   | 3.7   | 3.0   | 2.8   | 1.9   | 0.9   |
| Low back pain                             | 105.3 | 122.1 | 129.5 | 92.4  | 70.6  | 39.5  | 36.8  | 23.5  |
| B.8 Sense organ diseases                  | 0.4   | 1.0   | 1.6   | 1.9   | 2.3   | 2.1   | 3.2   | 3.2   |
| <i>C. Injuries</i>                        | -     | -     | 1.7   | 1.8   | 1.6   | 1.6   | 1.3   | 0.9   |
| C.1 Transport injuries                    | -     | -     | 0.7   | 0.6   | 0.5   | 0.5   | 0.3   | 0.2   |
| C.2 Unintentional injuries                | -     | -     | 1.0   | 1.1   | 1.0   | 1.1   | 0.9   | 0.7   |
| C.3 Self-harm & interpersonal violence    | -     | -     | -     | 0.0   | 0.0   | 0.0   | 0.0   | 0.0   |

**Table S3: Number of YLD related to smoking, by age and disease, women (continued)**

|                                           | 30-34 | 35-39 | 40-44 | 45-49 | 50-54 | 55-59 | 60-64 | 65-69 |
|-------------------------------------------|-------|-------|-------|-------|-------|-------|-------|-------|
| <b>Oman</b>                               |       |       |       |       |       |       |       |       |
| <i>All causes</i>                         | 45.7  | 62.1  | 72.4  | 92.7  | 92.3  | 89.0  | 76.6  | 68.6  |
| <i>A. Communicable diseases</i>           | 0.3   | 0.2   | 0.2   | 0.2   | 0.2   | 0.2   | 0.1   | 0.1   |
| A.1 Respiratory infections & tuberculosis | 0.3   | 0.2   | 0.2   | 0.2   | 0.2   | 0.2   | 0.1   | 0.1   |
| Tuberculosis                              | 0.1   | 0.1   | 0.1   | 0.1   | 0.0   | 0.0   | 0.0   | 0.1   |
| Lower respiratory infections              | 0.2   | 0.2   | 0.1   | 0.1   | 0.1   | 0.1   | 0.1   | 0.1   |
| <i>B. Non-communicable diseases</i>       | 45.4  | 61.9  | 71.3  | 91.7  | 91.3  | 88.0  | 75.8  | 67.0  |
| B.1 Neoplasms                             | 0.2   | 0.4   | 0.5   | 0.7   | 0.8   | 0.8   | 0.9   | 0.7   |
| Esophageal cancer                         | 0.0   | 0.0   | 0.0   | 0.0   | 0.0   | 0.0   | 0.0   | 0.0   |
| Stomach cancer                            | 0.0   | 0.0   | 0.0   | 0.0   | 0.0   | 0.0   | 0.0   | 0.0   |
| Liver cancer                              | 0.0   | 0.0   | 0.0   | 0.0   | 0.0   | 0.0   | 0.0   | 0.0   |
| Larynx cancer                             | 0.0   | 0.0   | 0.0   | 0.0   | 0.0   | 0.0   | 0.0   | 0.0   |
| Tracheal, bronchus, and lung cancer       | 0.0   | 0.0   | 0.0   | 0.1   | 0.1   | 0.1   | 0.1   | 0.1   |
| Breast cancer                             | 0.0   | 0.0   | 0.1   | 0.2   | 0.2   | 0.2   | 0.1   | 0.1   |
| Cervical cancer                           | 0.1   | 0.3   | 0.3   | 0.2   | 0.2   | 0.2   | 0.2   | 0.1   |
| Colon and rectum cancer                   | 0.0   | 0.0   | 0.0   | 0.0   | 0.1   | 0.1   | 0.1   | 0.0   |
| Lip and oral cavity cancer                | 0.0   | 0.0   | 0.0   | 0.0   | 0.1   | 0.0   | 0.0   | 0.0   |
| Nasopharynx cancer                        | 0.0   | 0.0   | 0.0   | 0.0   | 0.0   | 0.0   | 0.0   | 0.0   |
| Other pharynx cancer                      | 0.0   | 0.0   | 0.0   | 0.0   | 0.0   | 0.0   | 0.0   | 0.0   |
| Pancreatic cancer                         | 0.0   | 0.0   | 0.0   | 0.0   | 0.0   | 0.0   | 0.0   | 0.0   |
| Kidney cancer                             | 0.0   | 0.0   | 0.0   | 0.0   | 0.0   | 0.0   | 0.0   | 0.0   |
| Bladder cancer                            | 0.0   | 0.0   | 0.0   | 0.0   | 0.1   | 0.1   | 0.1   | 0.1   |
| Leukemia                                  | 0.0   | 0.0   | 0.0   | 0.0   | 0.0   | 0.0   | 0.0   | 0.0   |
| B.2 Cardiovascular diseases               | 3.8   | 6.1   | 8.5   | 16.3  | 20.5  | 19.7  | 20.3  | 14.1  |
| Ischemic heart disease                    | 1.0   | 2.0   | 3.3   | 6.6   | 8.0   | 7.1   | 7.4   | 5.2   |
| Stroke                                    | 2.6   | 3.9   | 4.9   | 9.5   | 12.0  | 11.8  | 12.0  | 7.6   |
| Atrial fibrillation and flutter           | 0.1   | 0.1   | 0.2   | 0.2   | 0.2   | 0.3   | 0.3   | 0.7   |
| Peripheral artery disease                 | -     | -     | 0.0   | 0.0   | 0.2   | 0.4   | 0.7   | 0.7   |
| B.3 Chronic respiratory diseases          | 5.1   | 7.9   | 8.8   | 13.5  | 14.2  | 16.0  | 14.2  | 12.3  |
| Chronic obstructive pulmonary disease     | 2.4   | 4.9   | 6.1   | 10.2  | 11.3  | 13.4  | 12.1  | 10.7  |
| Asthma                                    | 2.7   | 3.0   | 2.7   | 3.3   | 2.9   | 2.7   | 2.1   | 1.6   |
| B.4 Digestive diseases                    | 0.4   | 0.6   | 0.6   | 0.8   | 0.7   | 0.6   | 0.4   | 0.3   |
| B.5 Neurological disorders                | 0.3   | 0.4   | 0.3   | 0.3   | 0.4   | 0.6   | 1.0   | 1.5   |
| B.6 Diabetes mellitus                     | 6.3   | 9.0   | 16.1  | 14.5  | 15.0  | 14.1  | 10.1  | 14.1  |
| B.7 Musculoskeletal disorders             | 28.9  | 36.4  | 35.2  | 42.9  | 36.2  | 31.4  | 23.3  | 17.4  |
| Rheumatoid arthritis                      | 0.7   | 1.0   | 1.6   | 1.3   | 1.3   | 1.3   | 0.9   | 1.3   |
| Low back pain                             | 28.1  | 35.4  | 33.6  | 41.5  | 34.9  | 30.1  | 22.3  | 16.1  |
| B.8 Sense organ diseases                  | 0.5   | 1.0   | 1.4   | 2.7   | 3.5   | 4.7   | 5.6   | 6.6   |
| <i>C. Injuries</i>                        | -     | -     | 0.9   | 0.7   | 0.9   | 0.8   | 0.7   | 1.4   |
| C.1 Transport injuries                    | -     | -     | 0.5   | 0.3   | 0.4   | 0.3   | 0.2   | 0.4   |
| C.2 Unintentional injuries                | -     | -     | 0.4   | 0.4   | 0.5   | 0.5   | 0.4   | 1.0   |
| C.3 Self-harm & interpersonal violence    | -     | -     | -     | 0.0   | 0.0   | 0.0   | 0.0   | 0.0   |

**Table S3: Number of YLD related to smoking, by age and disease, women (continued)**

|                                           | 30-34 | 35-39 | 40-44 | 45-49 | 50-54 | 55-59 | 60-64 | 65-69 |
|-------------------------------------------|-------|-------|-------|-------|-------|-------|-------|-------|
| <b>Qatar</b>                              |       |       |       |       |       |       |       |       |
| <i>All causes</i>                         | 28.2  | 34.2  | 38.0  | 33.3  | 35.4  | 25.7  | 17.2  | 12.9  |
| <i>A. Communicable diseases</i>           | 0.2   | 0.2   | 0.1   | 0.1   | 0.1   | 0.0   | 0.0   | 0.0   |
| A.1 Respiratory infections & tuberculosis | 0.2   | 0.2   | 0.1   | 0.1   | 0.1   | 0.0   | 0.0   | 0.0   |
| Tuberculosis                              | 0.1   | 0.1   | 0.0   | 0.0   | 0.0   | 0.0   | 0.0   | 0.0   |
| Lower respiratory infections              | 0.1   | 0.1   | 0.1   | 0.0   | 0.0   | 0.0   | 0.0   | 0.0   |
| <i>B. Non-communicable diseases</i>       | 28.1  | 34.0  | 37.7  | 32.9  | 35.1  | 25.5  | 16.9  | 12.8  |
| B.1 Neoplasms                             | 0.1   | 0.1   | 0.1   | 0.2   | 0.3   | 0.4   | 0.3   | 0.3   |
| Esophageal cancer                         | 0.0   | 0.0   | 0.0   | 0.0   | 0.0   | 0.0   | 0.0   | 0.0   |
| Stomach cancer                            | 0.0   | 0.0   | 0.0   | 0.0   | 0.0   | 0.0   | 0.0   | 0.0   |
| Liver cancer                              | 0.0   | 0.0   | 0.0   | 0.0   | 0.0   | 0.0   | 0.0   | 0.0   |
| Larynx cancer                             | 0.0   | 0.0   | 0.0   | 0.0   | 0.0   | 0.0   | 0.0   | 0.0   |
| Tracheal, bronchus, and lung cancer       | 0.0   | 0.0   | 0.0   | 0.0   | 0.0   | 0.0   | 0.0   | 0.0   |
| Breast cancer                             | 0.1   | 0.0   | 0.1   | 0.1   | 0.2   | 0.2   | 0.1   | 0.1   |
| Cervical cancer                           | 0.0   | 0.0   | 0.0   | 0.0   | 0.0   | 0.1   | 0.0   | 0.0   |
| Colon and rectum cancer                   | 0.0   | 0.0   | 0.0   | 0.0   | 0.0   | 0.1   | 0.0   | 0.0   |
| Lip and oral cavity cancer                | 0.0   | 0.0   | 0.0   | 0.0   | 0.0   | 0.0   | 0.0   | 0.0   |
| Nasopharynx cancer                        | 0.0   | 0.0   | 0.0   | 0.0   | 0.0   | 0.0   | 0.0   | 0.0   |
| Other pharynx cancer                      | 0.0   | 0.0   | 0.0   | 0.0   | 0.0   | 0.0   | 0.0   | 0.0   |
| Pancreatic cancer                         | 0.0   | 0.0   | 0.0   | 0.0   | 0.0   | 0.0   | 0.0   | 0.0   |
| Kidney cancer                             | 0.0   | 0.0   | 0.0   | 0.0   | 0.0   | 0.0   | 0.0   | 0.0   |
| Bladder cancer                            | 0.0   | 0.0   | 0.0   | 0.0   | 0.0   | 0.0   | 0.0   | 0.0   |
| Leukemia                                  | 0.0   | 0.0   | 0.0   | 0.0   | 0.0   | 0.0   | 0.0   | 0.0   |
| B.2 Cardiovascular diseases               | 1.5   | 2.2   | 3.3   | 3.7   | 5.4   | 4.1   | 2.9   | 2.2   |
| Ischemic heart disease                    | 0.4   | 0.7   | 1.2   | 1.4   | 2.0   | 1.4   | 1.0   | 0.7   |
| Stroke                                    | 1.0   | 1.4   | 2.0   | 2.2   | 3.3   | 2.6   | 1.8   | 1.3   |
| Atrial fibrillation and flutter           | 0.0   | 0.1   | 0.1   | 0.1   | 0.1   | 0.1   | 0.1   | 0.1   |
| Peripheral artery disease                 | -     | -     | 0.0   | 0.0   | 0.0   | 0.1   | 0.1   | 0.1   |
| B.3 Chronic respiratory diseases          | 4.9   | 5.1   | 6.3   | 5.5   | 6.9   | 6.0   | 3.7   | 3.3   |
| Chronic obstructive pulmonary disease     | 3.2   | 3.3   | 4.5   | 4.2   | 5.6   | 5.1   | 3.2   | 3.0   |
| Asthma                                    | 1.7   | 1.9   | 1.8   | 1.3   | 1.3   | 0.9   | 0.5   | 0.4   |
| B.4 Digestive diseases                    | 0.4   | 0.5   | 0.5   | 0.4   | 0.4   | 0.2   | 0.1   | 0.1   |
| B.5 Neurological disorders                | 0.1   | 0.1   | 0.1   | 0.1   | 0.1   | 0.2   | 0.2   | 0.3   |
| B.6 Diabetes mellitus                     | 3.1   | 5.1   | 4.9   | 6.5   | 5.6   | 3.9   | 3.9   | 2.3   |
| B.7 Musculoskeletal disorders             | 17.9  | 20.8  | 22.2  | 16.3  | 15.9  | 10.1  | 5.4   | 3.8   |
| Rheumatoid arthritis                      | 0.3   | 0.5   | 0.4   | 0.5   | 0.4   | 0.3   | 0.3   | 0.1   |
| Low back pain                             | 17.6  | 20.4  | 21.8  | 15.7  | 15.4  | 9.9   | 5.2   | 3.7   |
| B.8 Sense organ diseases                  | 0.1   | 0.2   | 0.2   | 0.3   | 0.4   | 0.5   | 0.4   | 0.4   |
| <i>C. Injuries</i>                        | -     | -     | 0.2   | 0.3   | 0.3   | 0.2   | 0.2   | 0.2   |
| C.1 Transport injuries                    | -     | -     | 0.1   | 0.1   | 0.1   | 0.1   | 0.1   | 0.0   |
| C.2 Unintentional injuries                | -     | -     | 0.1   | 0.2   | 0.2   | 0.1   | 0.1   | 0.1   |
| C.3 Self-harm & interpersonal violence    | -     | -     | -     | 0.0   | 0.0   | 0.0   | 0.0   | 0.0   |

**Table S3: Number of YLD related to smoking, by age and disease, women (continued)**

|                                           | 30-34 | 35-39 | 40-44 | 45-49 | 50-54 | 55-59 | 60-64 | 65-69 |
|-------------------------------------------|-------|-------|-------|-------|-------|-------|-------|-------|
| <b>Saudi Arabia</b>                       |       |       |       |       |       |       |       |       |
| <i>All causes</i>                         | 279.5 | 284.4 | 406.4 | 380.1 | 378.1 | 428.7 | 399.9 | 263.2 |
| <i>A. Communicable diseases</i>           | 1.9   | 1.7   | 1.6   | 1.4   | 1.2   | 1.2   | 1.0   | 0.8   |
| A.1 Respiratory infections & tuberculosis | 1.9   | 1.7   | 1.6   | 1.4   | 1.2   | 1.2   | 1.0   | 0.8   |
| Tuberculosis                              | 0.8   | 0.9   | 0.7   | 0.6   | 0.6   | 0.6   | 0.5   | 0.5   |
| Lower respiratory infections              | 1.1   | 0.9   | 1.0   | 0.8   | 0.6   | 0.6   | 0.5   | 0.3   |
| <i>B. Non-communicable diseases</i>       | 277.6 | 282.6 | 400.4 | 373.8 | 368.4 | 418.1 | 390.2 | 254.3 |
| B.1 Neoplasms                             | 2.0   | 1.1   | 1.8   | 2.7   | 3.2   | 4.4   | 4.2   | 2.7   |
| Esophageal cancer                         | 0.0   | 0.0   | 0.0   | 0.0   | 0.1   | 0.1   | 0.1   | 0.1   |
| Stomach cancer                            | 0.0   | 0.0   | 0.0   | 0.0   | 0.0   | 0.0   | 0.1   | 0.0   |
| Liver cancer                              | 0.0   | 0.0   | 0.0   | 0.0   | 0.0   | 0.1   | 0.1   | 0.1   |
| Larynx cancer                             | 0.0   | 0.0   | 0.0   | 0.1   | 0.1   | 0.2   | 0.2   | 0.1   |
| Tracheal, bronchus, and lung cancer       | 0.0   | 0.0   | 0.1   | 0.1   | 0.2   | 0.4   | 0.5   | 0.4   |
| Breast cancer                             | 1.2   | 0.3   | 0.6   | 1.0   | 1.0   | 1.5   | 1.4   | 0.8   |
| Cervical cancer                           | 0.3   | 0.5   | 0.6   | 0.7   | 0.6   | 0.5   | 0.3   | 0.1   |
| Colon and rectum cancer                   | 0.1   | 0.0   | 0.1   | 0.2   | 0.3   | 0.4   | 0.4   | 0.3   |
| Lip and oral cavity cancer                | 0.1   | 0.1   | 0.1   | 0.1   | 0.2   | 0.3   | 0.3   | 0.2   |
| Nasopharynx cancer                        | 0.0   | 0.0   | 0.0   | 0.0   | 0.0   | 0.0   | 0.0   | 0.0   |
| Other pharynx cancer                      | 0.0   | 0.0   | 0.1   | 0.1   | 0.1   | 0.1   | 0.1   | 0.1   |
| Pancreatic cancer                         | 0.0   | 0.0   | 0.0   | 0.0   | 0.1   | 0.1   | 0.1   | 0.1   |
| Kidney cancer                             | 0.0   | 0.0   | 0.0   | 0.0   | 0.0   | 0.1   | 0.1   | 0.0   |
| Bladder cancer                            | 0.0   | 0.0   | 0.1   | 0.1   | 0.2   | 0.3   | 0.3   | 0.2   |
| Leukemia                                  | 0.1   | 0.1   | 0.1   | 0.2   | 0.2   | 0.3   | 0.3   | 0.2   |
| B.2 Cardiovascular diseases               | 18.0  | 22.4  | 43.5  | 55.0  | 66.6  | 80.1  | 89.8  | 54.6  |
| Ischemic heart disease                    | 5.2   | 7.6   | 17.2  | 22.3  | 25.9  | 28.3  | 31.5  | 19.2  |
| Stroke                                    | 12.5  | 14.2  | 25.8  | 31.9  | 39.2  | 48.6  | 54.3  | 31.5  |
| Atrial fibrillation and flutter           | 0.3   | 0.6   | 0.6   | 0.8   | 1.2   | 1.9   | 1.9   | 1.8   |
| Peripheral artery disease                 | -     | -     | 0.0   | 0.0   | 0.4   | 1.3   | 2.1   | 2.0   |
| B.3 Chronic respiratory diseases          | 43.8  | 30.8  | 50.2  | 52.5  | 57.7  | 84.3  | 87.4  | 65.2  |
| Chronic obstructive pulmonary disease     | 32.7  | 20.7  | 37.4  | 42.1  | 48.9  | 74.5  | 78.8  | 59.7  |
| Asthma                                    | 11.1  | 10.1  | 12.8  | 10.4  | 8.9   | 9.8   | 8.6   | 5.5   |
| B.4 Digestive diseases                    | 2.4   | 2.6   | 3.9   | 3.5   | 2.9   | 2.9   | 2.2   | 1.2   |
| B.5 Neurological disorders                | 1.0   | 1.1   | 1.1   | 1.5   | 1.9   | 2.7   | 4.5   | 5.6   |
| B.6 Diabetes mellitus                     | 21.6  | 39.6  | 43.5  | 47.6  | 61.1  | 61.0  | 45.9  | 28.9  |
| B.7 Musculoskeletal disorders             | 187.9 | 183.6 | 253.2 | 206.8 | 170.0 | 174.6 | 145.5 | 85.8  |
| Rheumatoid arthritis                      | 2.2   | 4.0   | 4.5   | 5.0   | 6.5   | 6.6   | 5.0   | 3.1   |
| Low back pain                             | 185.7 | 179.6 | 248.8 | 201.8 | 163.5 | 167.9 | 140.5 | 82.7  |
| B.8 Sense organ diseases                  | 0.9   | 1.5   | 3.1   | 4.0   | 5.0   | 8.1   | 10.7  | 10.3  |
| <i>C. Injuries</i>                        | -     | -     | 4.3   | 4.9   | 8.5   | 9.4   | 8.7   | 8.1   |
| C.1 Transport injuries                    | -     | -     | 2.0   | 1.8   | 3.1   | 2.9   | 2.2   | 1.8   |
| C.2 Unintentional injuries                | -     | -     | 2.4   | 3.1   | 5.4   | 6.5   | 6.5   | 6.3   |
| C.3 Self-harm & interpersonal violence    | -     | -     | -     | 0.0   | 0.1   | 0.0   | 0.0   | 0.0   |

**Table S3: Number of YLD related to smoking, by age and disease, women (continued)**

|                                           | 30-34 | 35-39 | 40-44 | 45-49 | 50-54 | 55-59 | 60-64 | 65-69 |
|-------------------------------------------|-------|-------|-------|-------|-------|-------|-------|-------|
| <b>UAE</b>                                |       |       |       |       |       |       |       |       |
| <i>All causes</i>                         | 182.3 | 202.1 | 292.6 | 294.8 | 146.8 | 109.7 | 62.6  | 61.9  |
| <i>A. Communicable diseases</i>           | 0.9   | 0.8   | 0.7   | 0.5   | 0.2   | 0.1   | 0.1   | 0.1   |
| A.1 Respiratory infections & tuberculosis | 0.9   | 0.8   | 0.7   | 0.5   | 0.2   | 0.1   | 0.1   | 0.1   |
| Tuberculosis                              | 0.2   | 0.4   | 0.3   | 0.1   | 0.1   | 0.0   | 0.1   | 0.0   |
| Lower respiratory infections              | 0.6   | 0.4   | 0.4   | 0.4   | 0.1   | 0.1   | 0.0   | 0.1   |
| <i>B. Non-communicable diseases</i>       | 181.4 | 201.3 | 286.2 | 291.9 | 144.2 | 108.9 | 60.6  | 60.9  |
| B.1 Neoplasms                             | 0.7   | 1.3   | 1.4   | 2.7   | 1.8   | 2.8   | 1.8   | 1.2   |
| Esophageal cancer                         | 0.0   | 0.0   | 0.1   | 0.1   | 0.1   | 0.1   | 0.2   | 0.1   |
| Stomach cancer                            | 0.0   | 0.0   | 0.0   | 0.0   | 0.0   | 0.0   | 0.0   | 0.0   |
| Liver cancer                              | 0.0   | 0.0   | 0.0   | 0.0   | 0.0   | 0.0   | 0.0   | 0.0   |
| Larynx cancer                             | 0.0   | 0.1   | 0.1   | 0.1   | 0.1   | 0.2   | 0.2   | 0.1   |
| Tracheal, bronchus, and lung cancer       | 0.0   | 0.0   | 0.0   | 0.2   | 0.2   | 0.4   | 0.2   | 0.2   |
| Breast cancer                             | 0.1   | 0.1   | 0.4   | 1.0   | 0.6   | 0.7   | 0.3   | 0.2   |
| Cervical cancer                           | 0.5   | 0.8   | 0.5   | 0.6   | 0.3   | 0.6   | 0.4   | 0.2   |
| Colon and rectum cancer                   | 0.0   | 0.0   | 0.1   | 0.2   | 0.2   | 0.2   | 0.1   | 0.1   |
| Lip and oral cavity cancer                | 0.0   | 0.0   | 0.0   | 0.1   | 0.0   | 0.1   | 0.0   | 0.0   |
| Nasopharynx cancer                        | 0.0   | 0.0   | 0.0   | 0.0   | 0.0   | 0.0   | 0.0   | 0.0   |
| Other pharynx cancer                      | 0.0   | 0.0   | 0.0   | 0.0   | 0.0   | 0.0   | 0.0   | 0.0   |
| Pancreatic cancer                         | 0.0   | 0.0   | 0.0   | 0.0   | 0.0   | 0.1   | 0.0   | 0.1   |
| Kidney cancer                             | 0.0   | 0.0   | 0.0   | 0.1   | 0.0   | 0.0   | 0.0   | 0.0   |
| Bladder cancer                            | 0.1   | 0.1   | 0.1   | 0.1   | 0.1   | 0.3   | 0.3   | 0.1   |
| Leukemia                                  | 0.0   | 0.0   | 0.1   | 0.2   | 0.1   | 0.2   | 0.1   | 0.1   |
| B.2 Cardiovascular diseases               | 17.1  | 19.1  | 36.8  | 54.2  | 29.5  | 23.8  | 10.7  | 13.0  |
| Ischemic heart disease                    | 3.4   | 4.3   | 9.4   | 13.9  | 7.4   | 5.4   | 2.4   | 3.0   |
| Stroke                                    | 13.5  | 14.1  | 26.7  | 39.8  | 21.5  | 17.8  | 7.5   | 9.1   |
| Atrial fibrillation and flutter           | 0.2   | 0.7   | 0.7   | 0.4   | 0.4   | 0.2   | 0.5   | 0.3   |
| Peripheral artery disease                 | -     | -     | 0.0   | 0.0   | 0.2   | 0.4   | 0.3   | 0.5   |
| B.3 Chronic respiratory diseases          | 33.4  | 33.6  | 56.6  | 70.2  | 34.3  | 33.5  | 13.2  | 19.5  |
| Chronic obstructive pulmonary disease     | 16.4  | 20.0  | 38.8  | 52.1  | 27.2  | 27.8  | 11.2  | 16.7  |
| Asthma                                    | 17.0  | 13.6  | 17.8  | 18.1  | 7.2   | 5.7   | 2.1   | 2.8   |
| B.4 Digestive diseases                    | 1.6   | 1.5   | 2.3   | 2.4   | 1.0   | 0.7   | 0.3   | 0.3   |
| B.5 Neurological disorders                | 2.6   | 3.7   | 1.3   | 1.1   | 0.6   | 0.9   | 0.6   | 1.3   |
| B.6 Diabetes mellitus                     | 14.1  | 44.5  | 52.2  | 27.3  | 24.7  | 8.8   | 19.1  | 7.1   |
| B.7 Musculoskeletal disorders             | 111.3 | 96.8  | 133.9 | 131.0 | 50.4  | 36.1  | 13.7  | 16.1  |
| Rheumatoid arthritis                      | 1.6   | 4.6   | 5.2   | 2.6   | 2.2   | 0.7   | 1.5   | 0.5   |
| Low back pain                             | 109.7 | 92.2  | 128.7 | 128.4 | 48.3  | 35.4  | 12.2  | 15.5  |
| B.8 Sense organ diseases                  | 0.6   | 0.9   | 1.9   | 3.1   | 1.9   | 2.3   | 1.2   | 2.3   |
| <i>C. Injuries</i>                        | -     | -     | 5.7   | 2.4   | 2.3   | 0.7   | 1.9   | 1.0   |
| C.1 Transport injuries                    | -     | -     | 2.6   | 0.9   | 0.9   | 0.2   | 0.6   | 0.3   |
| C.2 Unintentional injuries                | -     | -     | 3.0   | 1.4   | 1.4   | 0.4   | 1.3   | 0.7   |
| C.3 Self-harm & interpersonal violence    | -     | -     | -     | 0.0   | 0.0   | 0.0   | 0.0   | 0.0   |

Source: GBD Study, IHME

**Table S4: Number of deaths related to smoking, by age and disease, men**

|                                           | 30-34 | 35-39 | 40-44 | 45-49 | 50-54 | 55-59 | 60-64 | 65-69 |
|-------------------------------------------|-------|-------|-------|-------|-------|-------|-------|-------|
| <b>Bahrain</b>                            |       |       |       |       |       |       |       |       |
| <i>All causes</i>                         | 3.2   | 7.1   | 12.8  | 19.3  | 26.4  | 34.7  | 48.3  | 32.8  |
| <i>A. Communicable diseases</i>           | 0.3   | 0.5   | 0.6   | 0.6   | 0.8   | 1.1   | 1.6   | 1.3   |
| A.1 Respiratory infections & tuberculosis | 0.3   | 0.5   | 0.6   | 0.6   | 0.8   | 1.1   | 1.6   | 1.3   |
| Tuberculosis                              | 0.1   | 0.2   | 0.2   | 0.1   | 0.1   | 0.1   | 0.2   | 0.2   |
| Lower respiratory infections              | 0.2   | 0.3   | 0.5   | 0.4   | 0.6   | 1.0   | 1.4   | 1.1   |
| <i>B. Non-communicable diseases</i>       | 2.9   | 6.6   | 12.0  | 18.6  | 25.5  | 33.5  | 46.6  | 31.5  |
| B.1 Neoplasms                             | 0.3   | 0.8   | 1.7   | 3.2   | 5.2   | 8.7   | 14.1  | 10.1  |
| Esophageal cancer                         | 0.0   | 0.0   | 0.1   | 0.2   | 0.3   | 0.5   | 0.5   | 0.3   |
| Stomach cancer                            | 0.0   | 0.0   | 0.1   | 0.1   | 0.2   | 0.4   | 0.5   | 0.4   |
| Liver cancer                              | 0.0   | 0.0   | 0.1   | 0.1   | 0.2   | 0.4   | 0.5   | 0.3   |
| Larynx cancer                             | 0.0   | 0.0   | 0.1   | 0.1   | 0.2   | 0.3   | 0.6   | 0.3   |
| Tracheal, bronchus, and lung cancer       | 0.1   | 0.2   | 0.6   | 1.4   | 2.4   | 4.2   | 7.8   | 5.8   |
| Prostate cancer                           | 0.0   | 0.0   | 0.0   | 0.0   | 0.0   | 0.1   | 0.2   | 0.1   |
| Colon and rectum cancer                   | 0.0   | 0.1   | 0.1   | 0.3   | 0.4   | 0.6   | 1.0   | 0.6   |
| Lip and oral cavity cancer                | 0.0   | 0.0   | 0.1   | 0.1   | 0.2   | 0.4   | 0.4   | 0.2   |
| Nasopharynx cancer                        | 0.0   | 0.0   | 0.0   | 0.1   | 0.1   | 0.1   | 0.1   | 0.0   |
| Other pharynx cancer                      | 0.0   | 0.0   | 0.0   | 0.0   | 0.1   | 0.1   | 0.1   | 0.1   |
| Pancreatic cancer                         | 0.0   | 0.0   | 0.1   | 0.2   | 0.3   | 0.5   | 0.5   | 0.4   |
| Kidney cancer                             | 0.0   | 0.0   | 0.0   | 0.1   | 0.2   | 0.2   | 0.2   | 0.2   |
| Bladder cancer                            | 0.0   | 0.0   | 0.1   | 0.1   | 0.3   | 0.4   | 0.9   | 0.7   |
| Leukemia                                  | 0.1   | 0.2   | 0.3   | 0.4   | 0.5   | 0.6   | 0.8   | 0.5   |
| B.2 Cardiovascular diseases               | 2.5   | 5.4   | 9.3   | 13.4  | 16.9  | 18.9  | 22.5  | 12.3  |
| Ischemic heart disease                    | 2.0   | 4.4   | 7.7   | 11.6  | 14.9  | 16.6  | 19.5  | 10.2  |
| Stroke                                    | 0.4   | 0.9   | 1.4   | 1.4   | 1.6   | 1.7   | 2.3   | 1.4   |
| Atrial fibrillation and flutter           | 0.0   | 0.0   | 0.0   | 0.0   | 0.1   | 0.1   | 0.1   | 0.1   |
| Aortic aneurysm                           | 0.1   | 0.1   | 0.2   | 0.2   | 0.3   | 0.3   | 0.4   | 0.2   |
| Peripheral artery disease                 | -     | -     | 0.0   | 0.1   | 0.1   | 0.2   | 0.2   | 0.2   |
| B.3 Chronic respiratory diseases          | 0.1   | 0.1   | 0.2   | 0.4   | 0.7   | 1.2   | 2.6   | 2.9   |
| Chronic obstructive pulmonary disease     | 0.0   | 0.0   | 0.1   | 0.2   | 0.5   | 1.0   | 2.4   | 2.7   |
| Asthma                                    | 0.0   | 0.1   | 0.1   | 0.1   | 0.2   | 0.2   | 0.2   | 0.2   |
| B.4 Digestive diseases                    | 0.0   | 0.0   | 0.1   | 0.1   | 0.1   | 0.2   | 0.2   | 0.2   |
| B.5 Neurological disorders                | 0.0   | 0.0   | 0.0   | 0.1   | 0.2   | 0.3   | 0.6   | 0.7   |
| B.6 Diabetes mellitus                     | 0.1   | 0.2   | 0.6   | 1.5   | 2.4   | 4.2   | 6.6   | 5.4   |
| B.7 Musculoskeletal disorders             | 0.0   | 0.0   | 0.0   | 0.0   | 0.0   | 0.0   | 0.0   | 0.0   |
| <i>C. Injuries</i>                        | -     | -     | 0.1   | 0.1   | 0.1   | 0.1   | 0.1   | 0.1   |
| C.1 Transport injuries                    | -     | -     | 0.1   | 0.1   | 0.1   | 0.1   | 0.1   | 0.0   |
| C.2 Unintentional injuries                | -     | -     | 0.0   | 0.0   | 0.0   | 0.0   | 0.0   | 0.0   |
| C.3 Self-harm & interpersonal violence    | -     | -     | 0.0   | 0.0   | 0.0   | 0.0   | 0.0   | 0.0   |

**Table S4: Number of deaths related to smoking, by age and disease, men (continued)**

|                                           | 30-34 | 35-39 | 40-44 | 45-49 | 50-54 | 55-59 | 60-64 | 65-69 |
|-------------------------------------------|-------|-------|-------|-------|-------|-------|-------|-------|
| <b>Kuwait</b>                             |       |       |       |       |       |       |       |       |
| <i>All causes</i>                         | 31.3  | 49.6  | 72.8  | 101.2 | 120.0 | 98.3  | 96.4  | 65.9  |
| <i>A. Communicable diseases</i>           | 2.4   | 3.3   | 3.0   | 3.0   | 4.7   | 4.6   | 5.0   | 5.0   |
| A.1 Respiratory infections & tuberculosis | 2.4   | 3.3   | 3.0   | 3.0   | 4.7   | 4.6   | 5.0   | 5.0   |
| Tuberculosis                              | 0.2   | 0.3   | 0.2   | 0.3   | 0.2   | 0.3   | 0.3   | 0.2   |
| Lower respiratory infections              | 2.1   | 3.0   | 2.7   | 2.7   | 4.5   | 4.4   | 4.8   | 4.8   |
| <i>B. Non-communicable diseases</i>       | 28.9  | 46.3  | 69.1  | 97.5  | 114.9 | 93.4  | 91.1  | 60.7  |
| B.1 Neoplasms                             | 1.1   | 2.8   | 5.4   | 9.7   | 14.8  | 17.5  | 21.5  | 19.2  |
| Esophageal cancer                         | 0.1   | 0.2   | 0.3   | 0.5   | 0.7   | 0.8   | 0.8   | 0.5   |
| Stomach cancer                            | 0.0   | 0.1   | 0.2   | 0.4   | 0.5   | 0.6   | 0.6   | 0.5   |
| Liver cancer                              | 0.0   | 0.1   | 0.3   | 0.7   | 1.2   | 1.5   | 2.0   | 1.4   |
| Larynx cancer                             | 0.0   | 0.2   | 0.2   | 0.3   | 0.5   | 0.6   | 0.9   | 0.7   |
| Tracheal, bronchus, and lung cancer       | 0.2   | 0.7   | 1.9   | 3.7   | 6.2   | 8.1   | 10.2  | 10.2  |
| Prostate cancer                           | 0.0   | 0.0   | 0.0   | 0.1   | 0.1   | 0.2   | 0.3   | 0.4   |
| Colon and rectum cancer                   | 0.1   | 0.2   | 0.5   | 0.8   | 1.2   | 1.3   | 1.7   | 1.3   |
| Lip and oral cavity cancer                | 0.0   | 0.1   | 0.2   | 0.3   | 0.4   | 0.4   | 0.4   | 0.3   |
| Nasopharynx cancer                        | 0.0   | 0.0   | 0.1   | 0.1   | 0.2   | 0.2   | 0.2   | 0.1   |
| Other pharynx cancer                      | 0.0   | 0.1   | 0.1   | 0.2   | 0.3   | 0.2   | 0.3   | 0.1   |
| Pancreatic cancer                         | 0.0   | 0.1   | 0.3   | 0.6   | 0.9   | 1.2   | 1.0   | 0.9   |
| Kidney cancer                             | 0.0   | 0.1   | 0.1   | 0.2   | 0.3   | 0.5   | 0.4   | 0.3   |
| Bladder cancer                            | 0.1   | 0.2   | 0.3   | 0.6   | 0.7   | 0.9   | 1.3   | 1.6   |
| Leukemia                                  | 0.4   | 0.7   | 1.0   | 1.2   | 1.5   | 1.1   | 1.6   | 1.2   |
| B.2 Cardiovascular diseases               | 27.2  | 42.6  | 62.6  | 85.5  | 96.6  | 71.8  | 63.8  | 35.0  |
| Ischemic heart disease                    | 23.7  | 37.6  | 54.4  | 75.5  | 85.1  | 63.5  | 54.1  | 28.1  |
| Stroke                                    | 3.0   | 4.3   | 7.4   | 9.2   | 9.9   | 7.3   | 8.2   | 5.8   |
| Atrial fibrillation and flutter           | 0.0   | 0.0   | 0.1   | 0.0   | 0.0   | 0.1   | 0.1   | 0.1   |
| Aortic aneurysm                           | 0.4   | 0.7   | 0.7   | 0.7   | 1.5   | 0.9   | 1.2   | 0.9   |
| Peripheral artery disease                 | -     | -     | 0.0   | 0.0   | 0.0   | 0.0   | 0.0   | 0.1   |
| B.3 Chronic respiratory diseases          | 0.3   | 0.4   | 0.5   | 0.9   | 1.5   | 1.8   | 2.6   | 2.8   |
| Chronic obstructive pulmonary disease     | 0.2   | 0.2   | 0.4   | 0.7   | 1.3   | 1.6   | 2.4   | 2.7   |
| Asthma                                    | 0.2   | 0.2   | 0.1   | 0.2   | 0.2   | 0.2   | 0.2   | 0.1   |
| B.4 Digestive diseases                    | 0.1   | 0.1   | 0.2   | 0.2   | 0.4   | 0.3   | 0.3   | 0.3   |
| B.5 Neurological disorders                | 0.0   | 0.1   | 0.1   | 0.2   | 0.5   | 0.7   | 1.2   | 1.7   |
| B.6 Diabetes mellitus                     | 0.2   | 0.2   | 0.3   | 1.0   | 1.2   | 1.3   | 1.6   | 1.6   |
| B.7 Musculoskeletal disorders             | 0.0   | 0.0   | 0.0   | 0.0   | 0.0   | 0.0   | 0.0   | 0.0   |
| <i>C. Injuries</i>                        | -     | -     | 0.8   | 0.7   | 0.4   | 0.3   | 0.3   | 0.2   |
| C.1 Transport injuries                    | -     | -     | 0.6   | 0.5   | 0.3   | 0.3   | 0.2   | 0.2   |
| C.2 Unintentional injuries                | -     | -     | 0.1   | 0.1   | 0.1   | 0.1   | 0.1   | 0.0   |
| C.3 Self-harm & interpersonal violence    | -     | -     | 0.0   | 0.0   | 0.0   | 0.0   | 0.0   | 0.0   |

**Table S4: Number of deaths related to smoking, by age and disease, men (continued)**

|                                           | 30-34 | 35-39 | 40-44 | 45-49 | 50-54 | 55-59 | 60-64 | 65-69 |
|-------------------------------------------|-------|-------|-------|-------|-------|-------|-------|-------|
| <b>Oman</b>                               |       |       |       |       |       |       |       |       |
| <i>All causes</i>                         | 19.9  | 27.8  | 42.5  | 67.7  | 94.0  | 124.5 | 114.3 | 83.2  |
| <i>A. Communicable diseases</i>           | 2.1   | 1.9   | 2.1   | 2.6   | 2.7   | 4.6   | 5.4   | 5.3   |
| A.1 Respiratory infections & tuberculosis | 2.1   | 1.9   | 2.1   | 2.6   | 2.7   | 4.6   | 5.4   | 5.3   |
| Tuberculosis                              | 0.3   | 0.3   | 0.2   | 0.2   | 0.3   | 0.3   | 0.3   | 0.2   |
| Lower respiratory infections              | 1.8   | 1.7   | 1.9   | 2.4   | 2.5   | 4.3   | 5.1   | 5.1   |
| <i>B. Non-communicable diseases</i>       | 17.8  | 25.9  | 39.2  | 64.1  | 90.5  | 119.2 | 108.6 | 77.6  |
| B.1 Neoplasms                             | 1.0   | 2.4   | 4.6   | 8.7   | 13.7  | 21.6  | 20.8  | 16.6  |
| Esophageal cancer                         | 0.1   | 0.2   | 0.5   | 0.9   | 1.4   | 2.0   | 1.6   | 1.3   |
| Stomach cancer                            | 0.1   | 0.2   | 0.3   | 0.6   | 1.0   | 1.6   | 1.8   | 1.5   |
| Liver cancer                              | 0.1   | 0.2   | 0.3   | 0.7   | 1.1   | 1.8   | 1.5   | 1.1   |
| Larynx cancer                             | 0.1   | 0.1   | 0.3   | 0.7   | 1.0   | 1.4   | 1.1   | 0.8   |
| Tracheal, bronchus, and lung cancer       | 0.2   | 0.6   | 1.2   | 2.7   | 4.8   | 8.0   | 8.8   | 7.3   |
| Prostate cancer                           | 0.0   | 0.0   | 0.0   | 0.0   | 0.1   | 0.1   | 0.2   | 0.2   |
| Colon and rectum cancer                   | 0.0   | 0.1   | 0.3   | 0.5   | 0.7   | 1.1   | 1.1   | 0.8   |
| Lip and oral cavity cancer                | 0.1   | 0.1   | 0.3   | 0.6   | 0.8   | 1.2   | 0.8   | 0.5   |
| Nasopharynx cancer                        | 0.0   | 0.0   | 0.1   | 0.1   | 0.1   | 0.2   | 0.1   | 0.1   |
| Other pharynx cancer                      | 0.0   | 0.0   | 0.1   | 0.2   | 0.4   | 0.5   | 0.4   | 0.2   |
| Pancreatic cancer                         | 0.0   | 0.1   | 0.2   | 0.3   | 0.5   | 0.9   | 0.9   | 0.7   |
| Kidney cancer                             | 0.0   | 0.0   | 0.1   | 0.1   | 0.2   | 0.3   | 0.3   | 0.2   |
| Bladder cancer                            | 0.0   | 0.1   | 0.1   | 0.3   | 0.5   | 0.8   | 0.8   | 0.8   |
| Leukemia                                  | 0.4   | 0.6   | 0.7   | 0.9   | 1.1   | 1.5   | 1.3   | 1.0   |
| B.2 Cardiovascular diseases               | 16.3  | 22.8  | 33.5  | 53.1  | 72.8  | 90.7  | 79.4  | 51.9  |
| Ischemic heart disease                    | 13.3  | 18.7  | 28.6  | 45.9  | 63.8  | 76.6  | 65.7  | 42.9  |
| Stroke                                    | 2.3   | 3.3   | 4.2   | 6.3   | 7.6   | 12.0  | 11.9  | 7.5   |
| Atrial fibrillation and flutter           | 0.0   | 0.0   | 0.0   | 0.0   | 0.0   | 0.1   | 0.1   | 0.1   |
| Aortic aneurysm                           | 0.6   | 0.8   | 0.8   | 0.9   | 1.3   | 1.8   | 1.6   | 1.2   |
| Peripheral artery disease                 | -     | -     | 0.0   | 0.0   | 0.1   | 0.1   | 0.1   | 0.1   |
| B.3 Chronic respiratory diseases          | 0.1   | 0.2   | 0.2   | 0.5   | 0.9   | 2.0   | 3.3   | 4.3   |
| Chronic obstructive pulmonary disease     | 0.0   | 0.0   | 0.1   | 0.2   | 0.6   | 1.4   | 2.6   | 3.6   |
| Asthma                                    | 0.1   | 0.1   | 0.1   | 0.2   | 0.3   | 0.6   | 0.7   | 0.7   |
| B.4 Digestive diseases                    | 0.1   | 0.1   | 0.2   | 0.2   | 0.3   | 0.3   | 0.2   | 0.2   |
| B.5 Neurological disorders                | 0.1   | 0.1   | 0.1   | 0.1   | 0.4   | 0.9   | 1.3   | 1.9   |
| B.6 Diabetes mellitus                     | 0.3   | 0.4   | 0.6   | 1.5   | 2.5   | 3.7   | 3.6   | 2.8   |
| B.7 Musculoskeletal disorders             | 0.0   | 0.0   | 0.0   | 0.0   | 0.0   | 0.0   | 0.0   | 0.0   |
| <i>C. Injuries</i>                        | -     | -     | 1.1   | 1.0   | 0.8   | 0.6   | 0.4   | 0.3   |
| C.1 Transport injuries                    | -     | -     | 1.1   | 0.9   | 0.8   | 0.6   | 0.3   | 0.2   |
| C.2 Unintentional injuries                | -     | -     | 0.0   | 0.1   | 0.1   | 0.1   | 0.1   | 0.0   |
| C.3 Self-harm & interpersonal violence    | -     | -     | 0.0   | 0.0   | 0.0   | 0.0   | 0.0   | 0.0   |



**Table S4: Number of deaths related to smoking, by age and disease, men (continued)**

|                                           | 30-34 | 35-39 | 40-44 | 45-49 | 50-54 | 55-59 | 60-64 | 65-69 |
|-------------------------------------------|-------|-------|-------|-------|-------|-------|-------|-------|
| <b>Qatar</b>                              |       |       |       |       |       |       |       |       |
| <i>All causes</i>                         | 5.2   | 8.3   | 12.6  | 29.4  | 34.1  | 41.3  | 43.7  | 28.0  |
| <i>A. Communicable diseases</i>           | 0.7   | 0.8   | 0.7   | 1.0   | 0.7   | 1.2   | 1.5   | 1.1   |
| A.1 Respiratory infections & tuberculosis | 0.7   | 0.8   | 0.7   | 1.0   | 0.7   | 1.2   | 1.5   | 1.1   |
| Tuberculosis                              | 0.1   | 0.1   | 0.1   | 0.1   | 0.1   | 0.1   | 0.2   | 0.1   |
| Lower respiratory infections              | 0.6   | 0.7   | 0.6   | 0.9   | 0.6   | 1.0   | 1.3   | 1.0   |
| <i>B. Non-communicable diseases</i>       | 4.5   | 7.5   | 11.4  | 27.8  | 32.9  | 39.7  | 41.9  | 26.8  |
| B.1 Neoplasms                             | 0.4   | 0.9   | 1.7   | 5.6   | 7.8   | 12.1  | 14.7  | 10.6  |
| Esophageal cancer                         | 0.0   | 0.1   | 0.2   | 0.4   | 0.5   | 0.6   | 0.4   | 0.3   |
| Stomach cancer                            | 0.0   | 0.0   | 0.1   | 0.2   | 0.3   | 0.5   | 0.6   | 0.4   |
| Liver cancer                              | 0.0   | 0.0   | 0.1   | 0.3   | 0.6   | 1.1   | 1.3   | 1.1   |
| Larynx cancer                             | 0.0   | 0.1   | 0.1   | 0.3   | 0.4   | 0.6   | 0.5   | 0.5   |
| Tracheal, bronchus, and lung cancer       | 0.1   | 0.3   | 0.6   | 2.7   | 3.9   | 6.0   | 8.4   | 5.3   |
| Prostate cancer                           | 0.0   | 0.0   | 0.0   | 0.0   | 0.1   | 0.1   | 0.2   | 0.2   |
| Colon and rectum cancer                   | 0.0   | 0.1   | 0.1   | 0.3   | 0.4   | 0.6   | 0.7   | 0.7   |
| Lip and oral cavity cancer                | 0.0   | 0.0   | 0.1   | 0.1   | 0.2   | 0.3   | 0.3   | 0.2   |
| Nasopharynx cancer                        | 0.0   | 0.0   | 0.0   | 0.1   | 0.1   | 0.1   | 0.1   | 0.0   |
| Other pharynx cancer                      | 0.0   | 0.0   | 0.0   | 0.1   | 0.1   | 0.2   | 0.2   | 0.2   |
| Pancreatic cancer                         | 0.0   | 0.0   | 0.1   | 0.2   | 0.4   | 0.6   | 0.7   | 0.5   |
| Kidney cancer                             | 0.0   | 0.0   | 0.0   | 0.1   | 0.1   | 0.2   | 0.2   | 0.2   |
| Bladder cancer                            | 0.0   | 0.0   | 0.1   | 0.2   | 0.2   | 0.5   | 0.4   | 0.4   |
| Leukemia                                  | 0.2   | 0.2   | 0.3   | 0.6   | 0.6   | 0.9   | 0.8   | 0.6   |
| B.2 Cardiovascular diseases               | 3.8   | 6.3   | 9.2   | 20.7  | 22.6  | 23.0  | 21.4  | 11.3  |
| Ischemic heart disease                    | 2.7   | 4.5   | 7.0   | 16.6  | 19.1  | 19.5  | 18.6  | 9.6   |
| Stroke                                    | 1.0   | 1.6   | 2.0   | 3.8   | 3.0   | 2.9   | 2.2   | 1.3   |
| Atrial fibrillation and flutter           | 0.0   | 0.0   | 0.0   | 0.1   | 0.1   | 0.2   | 0.2   | 0.1   |
| Aortic aneurysm                           | 0.1   | 0.2   | 0.2   | 0.3   | 0.3   | 0.4   | 0.4   | 0.3   |
| Peripheral artery disease                 | -     | -     | 0.0   | 0.0   | 0.0   | 0.0   | 0.0   | 0.0   |
| B.3 Chronic respiratory diseases          | 0.1   | 0.2   | 0.2   | 0.5   | 0.7   | 1.1   | 1.8   | 1.9   |
| Chronic obstructive pulmonary disease     | 0.1   | 0.1   | 0.2   | 0.5   | 0.6   | 1.1   | 1.8   | 1.9   |
| Asthma                                    | 0.0   | 0.0   | 0.0   | 0.1   | 0.1   | 0.1   | 0.0   | 0.0   |
| B.4 Digestive diseases                    | 0.0   | 0.0   | 0.1   | 0.1   | 0.1   | 0.1   | 0.1   | 0.1   |
| B.5 Neurological disorders                | 0.0   | 0.0   | 0.0   | 0.1   | 0.2   | 0.4   | 0.6   | 0.8   |
| B.6 Diabetes mellitus                     | 0.1   | 0.1   | 0.2   | 0.8   | 1.5   | 3.0   | 3.2   | 2.1   |
| B.7 Musculoskeletal disorders             | 0.0   | 0.0   | 0.0   | 0.0   | 0.0   | 0.0   | 0.0   | 0.0   |
| <i>C. Injuries</i>                        | -     | -     | 0.6   | 0.6   | 0.4   | 0.4   | 0.3   | 0.1   |
| C.1 Transport injuries                    | -     | -     | 0.5   | 0.4   | 0.3   | 0.4   | 0.2   | 0.1   |
| C.2 Unintentional injuries                | -     | -     | 0.1   | 0.1   | 0.1   | 0.1   | 0.1   | 0.0   |
| C.3 Self-harm & interpersonal violence    | -     | -     | 0.0   | 0.0   | 0.0   | 0.0   | 0.0   | 0.0   |

**Table S4: Number of deaths related to smoking, by age and disease, men (continued)**

|                                           | 30-34 | 35-39 | 40-44 | 45-49 | 50-54 | 55-59 | 60-64 | 65-69 |
|-------------------------------------------|-------|-------|-------|-------|-------|-------|-------|-------|
| <b>Saudi Arabia</b>                       |       |       |       |       |       |       |       |       |
| <i>All causes</i>                         | 100.1 | 210.1 | 393.6 | 569.1 | 716.9 | 670.5 | 728.7 | 653.0 |
| <i>A. Communicable diseases</i>           | 16.3  | 25.2  | 29.8  | 31.3  | 35.0  | 34.9  | 40.8  | 40.0  |
| A.1 Respiratory infections & tuberculosis | 16.3  | 25.2  | 29.8  | 31.3  | 35.0  | 34.9  | 40.8  | 40.0  |
| Tuberculosis                              | 4.0   | 6.3   | 6.8   | 6.7   | 5.6   | 4.8   | 6.5   | 3.8   |
| Lower respiratory infections              | 12.3  | 18.9  | 23.0  | 24.7  | 29.4  | 30.1  | 34.4  | 36.2  |
| <i>B. Non-communicable diseases</i>       | 83.7  | 184.9 | 349.1 | 526.3 | 674.3 | 629.7 | 681.8 | 609.6 |
| B.1 Neoplasms                             | 5.6   | 17.2  | 38.1  | 72.1  | 103.4 | 136.4 | 159.8 | 178.2 |
| Esophageal cancer                         | 0.4   | 1.3   | 3.0   | 4.8   | 6.2   | 7.7   | 9.1   | 6.2   |
| Stomach cancer                            | 0.2   | 0.7   | 1.5   | 2.8   | 4.3   | 5.1   | 5.7   | 6.3   |
| Liver cancer                              | 0.2   | 0.6   | 1.5   | 3.8   | 6.1   | 10.1  | 13.6  | 16.0  |
| Larynx cancer                             | 0.3   | 1.2   | 2.7   | 4.6   | 6.3   | 7.9   | 6.6   | 6.0   |
| Tracheal, bronchus, and lung cancer       | 0.8   | 3.9   | 11.0  | 25.6  | 39.8  | 56.2  | 76.0  | 90.3  |
| Prostate cancer                           | 0.1   | 0.1   | 0.1   | 0.3   | 0.6   | 1.0   | 1.6   | 2.5   |
| Colon and rectum cancer                   | 0.5   | 1.4   | 3.0   | 6.1   | 8.9   | 11.3  | 12.0  | 13.9  |
| Lip and oral cavity cancer                | 0.3   | 1.0   | 2.5   | 4.1   | 4.8   | 5.5   | 5.2   | 5.0   |
| Nasopharynx cancer                        | 0.2   | 0.9   | 2.2   | 3.7   | 4.7   | 4.4   | 3.4   | 2.6   |
| Other pharynx cancer                      | 0.1   | 0.4   | 1.0   | 1.6   | 2.2   | 2.6   | 2.2   | 2.0   |
| Pancreatic cancer                         | 0.2   | 0.7   | 1.7   | 3.4   | 5.1   | 6.8   | 7.1   | 8.0   |
| Kidney cancer                             | 0.1   | 0.3   | 0.5   | 1.1   | 1.8   | 2.3   | 2.2   | 2.7   |
| Bladder cancer                            | 0.2   | 0.5   | 1.4   | 2.4   | 3.5   | 5.5   | 5.1   | 5.5   |
| Leukemia                                  | 2.0   | 4.3   | 5.8   | 7.8   | 9.0   | 9.9   | 10.0  | 11.2  |
| B.2 Cardiovascular diseases               | 75.1  | 160.6 | 298.7 | 431.9 | 534.3 | 444.2 | 452.0 | 347.6 |
| Ischemic heart disease                    | 56.9  | 126.6 | 245.5 | 362.6 | 449.4 | 367.8 | 366.1 | 274.6 |
| Stroke                                    | 16.7  | 30.7  | 48.9  | 64.1  | 78.4  | 69.2  | 78.1  | 65.7  |
| Atrial fibrillation and flutter           | 0.0   | 0.0   | 0.2   | 0.3   | 0.3   | 0.4   | 0.6   | 0.6   |
| Aortic aneurysm                           | 1.6   | 3.2   | 4.0   | 4.7   | 6.0   | 6.5   | 7.0   | 6.2   |
| Peripheral artery disease                 | -     | -     | 0.1   | 0.2   | 0.2   | 0.3   | 0.3   | 0.6   |
| B.3 Chronic respiratory diseases          | 1.7   | 4.5   | 7.3   | 12.4  | 23.0  | 30.1  | 44.0  | 55.2  |
| Chronic obstructive pulmonary disease     | 0.7   | 2.8   | 5.3   | 10.0  | 19.7  | 27.2  | 41.3  | 52.4  |
| Asthma                                    | 1.0   | 1.7   | 2.0   | 2.3   | 3.3   | 2.9   | 2.7   | 2.8   |
| B.4 Digestive diseases                    | 0.4   | 0.6   | 0.9   | 1.0   | 1.1   | 1.3   | 1.4   | 1.4   |
| B.5 Neurological disorders                | 0.2   | 0.3   | 0.6   | 1.1   | 2.9   | 4.8   | 8.7   | 17.0  |
| B.6 Diabetes mellitus                     | 0.7   | 1.7   | 3.5   | 7.8   | 9.6   | 12.8  | 15.8  | 10.2  |
| B.7 Musculoskeletal disorders             | 0.0   | 0.0   | 0.0   | 0.0   | 0.0   | 0.0   | 0.0   | 0.0   |
| <i>C. Injuries</i>                        | -     | -     | 14.7  | 11.5  | 7.7   | 5.9   | 6.0   | 3.4   |
| C.1 Transport injuries                    | -     | -     | 12.7  | 9.0   | 5.9   | 4.2   | 3.6   | 1.9   |
| C.2 Unintentional injuries                | -     | -     | 1.9   | 2.5   | 1.8   | 1.6   | 2.4   | 1.5   |
| C.3 Self-harm & interpersonal violence    | -     | -     | 0.1   | 0.0   | 0.0   | 0.0   | 0.0   | 0.0   |

**Table S4: Number of deaths related to smoking, by age and disease, men (continued)**

|                                           | 30-34 | 35-39 | 40-44 | 45-49 | 50-54 | 55-59 | 60-64 | 65-69 |
|-------------------------------------------|-------|-------|-------|-------|-------|-------|-------|-------|
| <b>UAE</b>                                |       |       |       |       |       |       |       |       |
| <i>All causes</i>                         | 47.3  | 139.4 | 282.9 | 371.0 | 382.6 | 282.6 | 420.9 | 119.8 |
| <i>A. Communicable diseases</i>           | 4.8   | 8.6   | 9.7   | 9.5   | 8.2   | 7.9   | 17.5  | 7.6   |
| A.1 Respiratory infections & tuberculosis | 4.8   | 8.6   | 9.7   | 9.5   | 8.2   | 7.9   | 17.5  | 7.6   |
| Tuberculosis                              | 1.5   | 2.8   | 2.3   | 2.0   | 1.5   | 1.0   | 1.3   | 0.4   |
| Lower respiratory infections              | 3.3   | 5.8   | 7.4   | 7.5   | 6.7   | 6.9   | 16.3  | 7.3   |
| <i>B. Non-communicable diseases</i>       | 42.5  | 130.8 | 264.6 | 356.0 | 370.5 | 272.0 | 401.3 | 111.5 |
| B.1 Neoplasms                             | 4.7   | 20.2  | 40.9  | 61.2  | 72.4  | 78.9  | 116.4 | 35.8  |
| Esophageal cancer                         | 0.9   | 3.9   | 8.8   | 12.0  | 15.2  | 14.2  | 15.4  | 4.8   |
| Stomach cancer                            | 0.1   | 0.6   | 1.3   | 2.0   | 2.3   | 3.0   | 5.9   | 2.0   |
| Liver cancer                              | 0.1   | 0.7   | 1.7   | 2.8   | 3.2   | 3.6   | 5.2   | 1.6   |
| Larynx cancer                             | 0.9   | 3.1   | 5.6   | 8.5   | 10.2  | 7.6   | 8.6   | 2.5   |
| Tracheal, bronchus, and lung cancer       | 0.6   | 3.5   | 8.6   | 15.2  | 19.9  | 28.5  | 50.6  | 14.8  |
| Prostate cancer                           | 0.1   | 0.1   | 0.1   | 0.2   | 0.3   | 0.4   | 0.8   | 0.3   |
| Colon and rectum cancer                   | 0.2   | 1.0   | 2.0   | 3.0   | 3.1   | 4.2   | 6.4   | 2.1   |
| Lip and oral cavity cancer                | 0.2   | 1.0   | 2.0   | 2.6   | 2.4   | 2.3   | 2.7   | 0.7   |
| Nasopharynx cancer                        | 0.1   | 0.3   | 0.6   | 0.9   | 0.7   | 0.6   | 0.6   | 0.1   |
| Other pharynx cancer                      | 0.1   | 0.4   | 0.9   | 1.4   | 1.5   | 1.3   | 1.7   | 0.5   |
| Pancreatic cancer                         | 0.1   | 0.9   | 2.2   | 3.6   | 3.9   | 4.0   | 5.7   | 1.7   |
| Kidney cancer                             | 0.1   | 0.3   | 0.6   | 1.0   | 1.1   | 1.1   | 1.4   | 0.4   |
| Bladder cancer                            | 0.4   | 1.2   | 2.3   | 3.7   | 4.8   | 4.2   | 5.4   | 2.0   |
| Leukemia                                  | 0.9   | 3.0   | 4.1   | 4.3   | 3.6   | 3.9   | 6.1   | 2.1   |
| B.2 Cardiovascular diseases               | 28.4  | 83.1  | 178.2 | 228.4 | 229.0 | 141.2 | 209.7 | 51.6  |
| Ischemic heart disease                    | 20.0  | 55.7  | 135.0 | 175.0 | 177.7 | 107.0 | 153.0 | 37.8  |
| Stroke                                    | 7.1   | 24.4  | 38.9  | 49.0  | 46.7  | 30.6  | 51.4  | 12.1  |
| Atrial fibrillation and flutter           | 0.0   | 0.0   | 0.2   | 0.2   | 0.2   | 0.3   | 0.3   | 0.1   |
| Aortic aneurysm                           | 1.2   | 3.0   | 3.9   | 3.9   | 4.0   | 3.0   | 4.6   | 1.3   |
| Peripheral artery disease                 | -     | -     | 0.1   | 0.3   | 0.3   | 0.3   | 0.4   | 0.2   |
| B.3 Chronic respiratory diseases          | 8.6   | 25.6  | 41.7  | 57.3  | 56.4  | 37.7  | 54.4  | 16.2  |
| Chronic obstructive pulmonary disease     | 4.7   | 17.2  | 31.6  | 47.2  | 48.6  | 33.4  | 49.0  | 14.7  |
| Asthma                                    | 4.0   | 8.4   | 10.1  | 10.2  | 7.8   | 4.2   | 5.4   | 1.5   |
| B.4 Digestive diseases                    | 0.2   | 0.6   | 1.0   | 1.2   | 1.4   | 0.8   | 1.4   | 0.3   |
| B.5 Neurological disorders                | 0.3   | 0.5   | 0.6   | 0.8   | 1.7   | 1.9   | 5.0   | 2.9   |
| B.6 Diabetes mellitus                     | 0.3   | 0.8   | 2.2   | 6.9   | 9.5   | 11.6  | 14.4  | 4.7   |
| B.7 Musculoskeletal disorders             | 0.0   | 0.0   | 0.0   | 0.0   | 0.0   | 0.0   | 0.0   | 0.0   |
| <i>C. Injuries</i>                        | -     | -     | 8.6   | 5.5   | 3.9   | 2.7   | 2.1   | 0.7   |
| C.1 Transport injuries                    | -     | -     | 7.4   | 4.6   | 3.3   | 2.2   | 1.8   | 0.6   |
| C.2 Unintentional injuries                | -     | -     | 1.2   | 0.9   | 0.6   | 0.4   | 0.4   | 0.1   |
| C.3 Self-harm & interpersonal violence    | -     | -     | 0.0   | 0.0   | 0.0   | 0.0   | 0.0   | 0.0   |

Source: GBD Study, IHME

**Table S5: Number of deaths related to smoking, by age and disease, women**

|                                           | 30-34 | 35-39 | 40-44 | 45-49 | 50-54 | 55-59 | 60-64 | 65-69 |
|-------------------------------------------|-------|-------|-------|-------|-------|-------|-------|-------|
| <b>Bahrain</b>                            |       |       |       |       |       |       |       |       |
| <i>All causes</i>                         | 0.1   | 0.2   | 0.3   | 0.8   | 2.2   | 3.5   | 5.4   | 5.6   |
| <i>A. Communicable diseases</i>           | 0.0   | 0.0   | 0.0   | 0.0   | 0.1   | 0.1   | 0.2   | 0.2   |
| A.1 Respiratory infections & tuberculosis | 0.0   | 0.0   | 0.0   | 0.0   | 0.1   | 0.1   | 0.2   | 0.2   |
| Tuberculosis                              | 0.0   | 0.0   | 0.0   | 0.0   | 0.0   | 0.0   | 0.0   | 0.0   |
| Lower respiratory infections              | 0.0   | 0.0   | 0.0   | 0.0   | 0.1   | 0.1   | 0.2   | 0.2   |
| <i>B. Non-communicable diseases</i>       | 0.1   | 0.2   | 0.3   | 0.7   | 2.1   | 3.4   | 5.2   | 5.4   |
| B.1 Neoplasms                             | 0.0   | 0.0   | 0.1   | 0.2   | 0.4   | 0.8   | 1.0   | 1.0   |
| Esophageal cancer                         | 0.0   | 0.0   | 0.0   | 0.0   | 0.0   | 0.0   | 0.0   | 0.0   |
| Stomach cancer                            | 0.0   | 0.0   | 0.0   | 0.0   | 0.0   | 0.0   | 0.0   | 0.0   |
| Liver cancer                              | 0.0   | 0.0   | 0.0   | 0.0   | 0.0   | 0.0   | 0.0   | 0.0   |
| Larynx cancer                             | 0.0   | 0.0   | 0.0   | 0.0   | 0.0   | 0.0   | 0.0   | 0.0   |
| Tracheal, bronchus, and lung cancer       | 0.0   | 0.0   | 0.0   | 0.0   | 0.1   | 0.3   | 0.4   | 0.5   |
| Breast cancer                             | 0.0   | 0.0   | 0.0   | 0.0   | 0.1   | 0.1   | 0.1   | 0.1   |
| Cervical cancer                           | 0.0   | 0.0   | 0.0   | 0.0   | 0.1   | 0.2   | 0.1   | 0.1   |
| Colon and rectum cancer                   | 0.0   | 0.0   | 0.0   | 0.0   | 0.0   | 0.0   | 0.0   | 0.0   |
| Lip and oral cavity cancer                | 0.0   | 0.0   | 0.0   | 0.0   | 0.0   | 0.0   | 0.0   | 0.0   |
| Nasopharynx cancer                        | 0.0   | 0.0   | 0.0   | 0.0   | 0.0   | 0.0   | 0.0   | 0.0   |
| Other pharynx cancer                      | 0.0   | 0.0   | 0.0   | 0.0   | 0.0   | 0.0   | 0.0   | 0.0   |
| Pancreatic cancer                         | 0.0   | 0.0   | 0.0   | 0.0   | 0.0   | 0.1   | 0.1   | 0.1   |
| Kidney cancer                             | 0.0   | 0.0   | 0.0   | 0.0   | 0.0   | 0.0   | 0.0   | 0.0   |
| Bladder cancer                            | 0.0   | 0.0   | 0.0   | 0.0   | 0.0   | 0.0   | 0.0   | 0.0   |
| Leukemia                                  | 0.0   | 0.0   | 0.0   | 0.0   | 0.0   | 0.0   | 0.0   | 0.0   |
| B.2 Cardiovascular diseases               | 0.1   | 0.1   | 0.2   | 0.5   | 1.4   | 1.8   | 2.9   | 2.9   |
| Ischemic heart disease                    | 0.0   | 0.1   | 0.1   | 0.4   | 1.2   | 1.5   | 2.4   | 2.4   |
| Stroke                                    | 0.0   | 0.0   | 0.1   | 0.1   | 0.2   | 0.3   | 0.5   | 0.4   |
| Atrial fibrillation and flutter           | 0.0   | 0.0   | 0.0   | 0.0   | 0.0   | 0.0   | 0.0   | 0.0   |
| Aortic aneurysm                           | 0.0   | 0.0   | 0.0   | 0.0   | 0.0   | 0.0   | 0.0   | 0.0   |
| Peripheral artery disease                 | -     | -     | 0.0   | 0.0   | 0.0   | 0.0   | 0.0   | 0.0   |
| B.3 Chronic respiratory diseases          | 0.0   | 0.0   | 0.0   | 0.0   | 0.1   | 0.2   | 0.2   | 0.4   |
| Chronic obstructive pulmonary disease     | 0.0   | 0.0   | 0.0   | 0.0   | 0.0   | 0.1   | 0.2   | 0.3   |
| Asthma                                    | 0.0   | 0.0   | 0.0   | 0.0   | 0.0   | 0.0   | 0.1   | 0.0   |
| B.4 Digestive diseases                    | 0.0   | 0.0   | 0.0   | 0.0   | 0.0   | 0.0   | 0.0   | 0.0   |
| B.5 Neurological disorders                | 0.0   | 0.0   | 0.0   | 0.0   | 0.0   | 0.0   | 0.1   | 0.1   |
| B.6 Diabetes mellitus                     | 0.0   | 0.0   | 0.0   | 0.1   | 0.2   | 0.6   | 0.9   | 1.0   |
| B.7 Musculoskeletal disorders             | 0.0   | 0.0   | 0.0   | 0.0   | 0.0   | 0.0   | 0.0   | 0.0   |
| <i>C. Injuries</i>                        | -     | -     | 0.0   | 0.0   | 0.0   | 0.0   | 0.0   | 0.0   |
| C.1 Transport injuries                    | -     | -     | 0.0   | 0.0   | 0.0   | 0.0   | 0.0   | 0.0   |
| C.2 Unintentional injuries                | -     | -     | 0.0   | 0.0   | 0.0   | 0.0   | 0.0   | 0.0   |
| C.3 Self-harm & interpersonal violence    | -     | -     | -     | 0.0   | 0.0   | 0.0   | 0.0   | 0.0   |

**Table S5: Number of deaths related to smoking, by age and disease, women (continued)**

|                                           | 30-34 | 35-39 | 40-44 | 45-49 | 50-54 | 55-59 | 60-64 | 65-69 |
|-------------------------------------------|-------|-------|-------|-------|-------|-------|-------|-------|
| <b>Kuwait</b>                             |       |       |       |       |       |       |       |       |
| <i>All causes</i>                         | 1.0   | 1.4   | 2.3   | 3.1   | 4.3   | 3.1   | 4.9   | 4.0   |
| <i>A. Communicable diseases</i>           | 0.2   | 0.2   | 0.2   | 0.2   | 0.3   | 0.3   | 0.4   | 0.5   |
| A.1 Respiratory infections & tuberculosis | 0.2   | 0.2   | 0.2   | 0.2   | 0.3   | 0.3   | 0.4   | 0.5   |
| Tuberculosis                              | 0.0   | 0.0   | 0.0   | 0.0   | 0.0   | 0.0   | 0.0   | 0.0   |
| Lower respiratory infections              | 0.1   | 0.1   | 0.2   | 0.1   | 0.3   | 0.2   | 0.4   | 0.5   |
| <i>B. Non-communicable diseases</i>       | 0.8   | 1.3   | 2.1   | 3.0   | 4.0   | 2.9   | 4.5   | 3.5   |
| B.1 Neoplasms                             | 0.1   | 0.2   | 0.4   | 0.6   | 0.8   | 0.8   | 1.1   | 0.9   |
| Esophageal cancer                         | 0.0   | 0.0   | 0.0   | 0.0   | 0.0   | 0.0   | 0.0   | 0.0   |
| Stomach cancer                            | 0.0   | 0.0   | 0.0   | 0.0   | 0.0   | 0.0   | 0.0   | 0.0   |
| Liver cancer                              | 0.0   | 0.0   | 0.0   | 0.0   | 0.0   | 0.0   | 0.0   | 0.1   |
| Larynx cancer                             | 0.0   | 0.0   | 0.0   | 0.0   | 0.0   | 0.0   | 0.0   | 0.0   |
| Tracheal, bronchus, and lung cancer       | 0.0   | 0.0   | 0.1   | 0.2   | 0.3   | 0.2   | 0.4   | 0.4   |
| Breast cancer                             | 0.0   | 0.0   | 0.1   | 0.1   | 0.1   | 0.1   | 0.1   | 0.1   |
| Cervical cancer                           | 0.0   | 0.0   | 0.1   | 0.1   | 0.1   | 0.1   | 0.0   | 0.0   |
| Colon and rectum cancer                   | 0.0   | 0.0   | 0.0   | 0.0   | 0.0   | 0.1   | 0.1   | 0.1   |
| Lip and oral cavity cancer                | 0.0   | 0.0   | 0.0   | 0.0   | 0.0   | 0.0   | 0.0   | 0.0   |
| Nasopharynx cancer                        | 0.0   | 0.0   | 0.0   | 0.0   | 0.0   | 0.0   | 0.0   | 0.0   |
| Other pharynx cancer                      | 0.0   | 0.0   | 0.0   | 0.0   | 0.0   | 0.0   | 0.0   | 0.0   |
| Pancreatic cancer                         | 0.0   | 0.0   | 0.0   | 0.1   | 0.1   | 0.1   | 0.1   | 0.1   |
| Kidney cancer                             | 0.0   | 0.0   | 0.0   | 0.0   | 0.0   | 0.0   | 0.0   | 0.0   |
| Bladder cancer                            | 0.0   | 0.0   | 0.0   | 0.0   | 0.0   | 0.0   | 0.0   | 0.0   |
| Leukemia                                  | 0.0   | 0.0   | 0.1   | 0.1   | 0.0   | 0.1   | 0.1   | 0.1   |
| B.2 Cardiovascular diseases               | 0.7   | 1.0   | 1.6   | 2.2   | 3.0   | 1.7   | 3.0   | 2.1   |
| Ischemic heart disease                    | 0.5   | 0.7   | 1.1   | 1.6   | 2.4   | 1.4   | 2.4   | 1.6   |
| Stroke                                    | 0.2   | 0.3   | 0.5   | 0.5   | 0.5   | 0.3   | 0.5   | 0.4   |
| Atrial fibrillation and flutter           | 0.0   | 0.0   | 0.0   | 0.0   | 0.0   | 0.0   | 0.0   | 0.0   |
| Aortic aneurysm                           | 0.0   | 0.0   | 0.0   | 0.1   | 0.1   | 0.0   | 0.1   | 0.0   |
| Peripheral artery disease                 | -     | -     | 0.0   | 0.0   | 0.0   | 0.0   | 0.0   | 0.0   |
| B.3 Chronic respiratory diseases          | 0.0   | 0.0   | 0.1   | 0.1   | 0.1   | 0.1   | 0.1   | 0.2   |
| Chronic obstructive pulmonary disease     | 0.0   | 0.0   | 0.0   | 0.1   | 0.1   | 0.1   | 0.1   | 0.1   |
| Asthma                                    | 0.0   | 0.0   | 0.0   | 0.0   | 0.0   | 0.0   | 0.0   | 0.0   |
| B.4 Digestive diseases                    | 0.0   | 0.0   | 0.0   | 0.0   | 0.0   | 0.0   | 0.0   | 0.0   |
| B.5 Neurological disorders                | 0.0   | 0.0   | 0.0   | 0.0   | 0.0   | 0.1   | 0.1   | 0.2   |
| B.6 Diabetes mellitus                     | 0.0   | 0.0   | 0.0   | 0.0   | 0.1   | 0.1   | 0.1   | 0.1   |
| B.7 Musculoskeletal disorders             | 0.0   | 0.0   | 0.0   | 0.0   | 0.0   | 0.0   | 0.0   | 0.0   |
| <i>C. Injuries</i>                        | -     | -     | 0.0   | 0.0   | 0.0   | 0.0   | 0.0   | 0.0   |
| C.1 Transport injuries                    | -     | -     | 0.0   | 0.0   | 0.0   | 0.0   | 0.0   | 0.0   |
| C.2 Unintentional injuries                | -     | -     | 0.0   | 0.0   | 0.0   | 0.0   | 0.0   | 0.0   |
| C.3 Self-harm & interpersonal violence    | -     | -     | -     | 0.0   | 0.0   | 0.0   | 0.0   | 0.0   |

**Table S5: Number of deaths related to smoking, by age and disease, women (continued)**

|                                           | 30-34 | 35-39 | 40-44 | 45-49 | 50-54 | 55-59 | 60-64 | 65-69 |
|-------------------------------------------|-------|-------|-------|-------|-------|-------|-------|-------|
| <b>Oman</b>                               |       |       |       |       |       |       |       |       |
| <i>All causes</i>                         | 0.7   | 1.2   | 2.1   | 4.6   | 7.3   | 9.2   | 11.5  | 10.4  |
| <i>A. Communicable diseases</i>           | 0.1   | 0.1   | 0.1   | 0.1   | 0.2   | 0.3   | 0.4   | 0.5   |
| A.1 Respiratory infections & tuberculosis | 0.1   | 0.1   | 0.1   | 0.1   | 0.2   | 0.3   | 0.4   | 0.5   |
| Tuberculosis                              | 0.0   | 0.0   | 0.0   | 0.0   | 0.0   | 0.0   | 0.0   | 0.0   |
| Lower respiratory infections              | 0.1   | 0.1   | 0.1   | 0.1   | 0.1   | 0.3   | 0.4   | 0.5   |
| <i>B. Non-communicable diseases</i>       | 0.6   | 1.2   | 2.0   | 4.5   | 7.2   | 8.9   | 11.1  | 9.8   |
| B.1 Neoplasms                             | 0.0   | 0.1   | 0.3   | 0.6   | 0.8   | 1.1   | 1.3   | 1.2   |
| Esophageal cancer                         | 0.0   | 0.0   | 0.0   | 0.0   | 0.1   | 0.1   | 0.1   | 0.1   |
| Stomach cancer                            | 0.0   | 0.0   | 0.0   | 0.0   | 0.0   | 0.1   | 0.1   | 0.1   |
| Liver cancer                              | 0.0   | 0.0   | 0.0   | 0.0   | 0.0   | 0.0   | 0.0   | 0.0   |
| Larynx cancer                             | 0.0   | 0.0   | 0.0   | 0.0   | 0.0   | 0.0   | 0.0   | 0.0   |
| Tracheal, bronchus, and lung cancer       | 0.0   | 0.0   | 0.1   | 0.2   | 0.3   | 0.4   | 0.5   | 0.4   |
| Breast cancer                             | 0.0   | 0.0   | 0.0   | 0.1   | 0.1   | 0.1   | 0.1   | 0.0   |
| Cervical cancer                           | 0.0   | 0.1   | 0.1   | 0.1   | 0.1   | 0.2   | 0.2   | 0.2   |
| Colon and rectum cancer                   | 0.0   | 0.0   | 0.0   | 0.0   | 0.0   | 0.1   | 0.1   | 0.1   |
| Lip and oral cavity cancer                | 0.0   | 0.0   | 0.0   | 0.0   | 0.0   | 0.0   | 0.0   | 0.0   |
| Nasopharynx cancer                        | 0.0   | 0.0   | 0.0   | 0.0   | 0.0   | 0.0   | 0.0   | 0.0   |
| Other pharynx cancer                      | 0.0   | 0.0   | 0.0   | 0.0   | 0.0   | 0.0   | 0.0   | 0.0   |
| Pancreatic cancer                         | 0.0   | 0.0   | 0.0   | 0.0   | 0.1   | 0.1   | 0.1   | 0.1   |
| Kidney cancer                             | 0.0   | 0.0   | 0.0   | 0.0   | 0.0   | 0.0   | 0.0   | 0.0   |
| Bladder cancer                            | 0.0   | 0.0   | 0.0   | 0.0   | 0.0   | 0.0   | 0.1   | 0.1   |
| Leukemia                                  | 0.0   | 0.0   | 0.0   | 0.1   | 0.1   | 0.1   | 0.1   | 0.1   |
| B.2 Cardiovascular diseases               | 0.6   | 1.0   | 1.6   | 3.7   | 6.0   | 7.2   | 9.0   | 7.3   |
| Ischemic heart disease                    | 0.4   | 0.7   | 1.2   | 2.9   | 4.9   | 6.0   | 7.7   | 6.0   |
| Stroke                                    | 0.1   | 0.2   | 0.3   | 0.7   | 1.0   | 1.1   | 1.3   | 1.2   |
| Atrial fibrillation and flutter           | 0.0   | 0.0   | 0.0   | 0.0   | 0.0   | 0.0   | 0.0   | 0.0   |
| Aortic aneurysm                           | 0.0   | 0.0   | 0.0   | 0.0   | 0.1   | 0.1   | 0.1   | 0.0   |
| Peripheral artery disease                 | -     | -     | 0.0   | 0.0   | 0.0   | 0.0   | 0.0   | 0.0   |
| B.3 Chronic respiratory diseases          | 0.0   | 0.0   | 0.0   | 0.0   | 0.1   | 0.1   | 0.2   | 0.3   |
| Chronic obstructive pulmonary disease     | 0.0   | 0.0   | 0.0   | 0.0   | 0.0   | 0.1   | 0.1   | 0.2   |
| Asthma                                    | 0.0   | 0.0   | 0.0   | 0.0   | 0.0   | 0.1   | 0.1   | 0.1   |
| B.4 Digestive diseases                    | 0.0   | 0.0   | 0.0   | 0.0   | 0.0   | 0.0   | 0.0   | 0.0   |
| B.5 Neurological disorders                | 0.0   | 0.0   | 0.0   | 0.0   | 0.0   | 0.1   | 0.1   | 0.2   |
| B.6 Diabetes mellitus                     | 0.0   | 0.0   | 0.1   | 0.1   | 0.2   | 0.4   | 0.4   | 0.8   |
| B.7 Musculoskeletal disorders             | 0.0   | 0.0   | 0.0   | 0.0   | 0.0   | 0.0   | 0.0   | 0.0   |
| <i>C. Injuries</i>                        | -     | -     | 0.0   | 0.0   | 0.0   | 0.0   | 0.0   | 0.0   |
| C.1 Transport injuries                    | -     | -     | 0.0   | 0.0   | 0.0   | 0.0   | 0.0   | 0.0   |
| C.2 Unintentional injuries                | -     | -     | 0.0   | 0.0   | 0.0   | 0.0   | 0.0   | 0.0   |
| C.3 Self-harm & interpersonal violence    | -     | -     | -     | 0.0   | 0.0   | 0.0   | 0.0   | 0.0   |

**Table S5: Number of deaths related to smoking, by age and disease, women (continued)**

|                                           | 30-34 | 35-39 | 40-44 | 45-49 | 50-54 | 55-59 | 60-64 | 65-69 |
|-------------------------------------------|-------|-------|-------|-------|-------|-------|-------|-------|
| <b>Qatar</b>                              |       |       |       |       |       |       |       |       |
| <i>All causes</i>                         | 0.1   | 0.1   | 0.3   | 0.4   | 1.1   | 1.4   | 1.5   | 1.5   |
| <i>A. Communicable diseases</i>           | 0.0   | 0.0   | 0.0   | 0.0   | 0.0   | 0.0   | 0.0   | 0.1   |
| A.1 Respiratory infections & tuberculosis | 0.0   | 0.0   | 0.0   | 0.0   | 0.0   | 0.0   | 0.0   | 0.1   |
| Tuberculosis                              | 0.0   | 0.0   | 0.0   | 0.0   | 0.0   | 0.0   | 0.0   | 0.0   |
| Lower respiratory infections              | 0.0   | 0.0   | 0.0   | 0.0   | 0.0   | 0.0   | 0.0   | 0.1   |
| <i>B. Non-communicable diseases</i>       | 0.1   | 0.1   | 0.3   | 0.4   | 1.0   | 1.4   | 1.4   | 1.4   |
| B.1 Neoplasms                             | 0.0   | 0.0   | 0.1   | 0.1   | 0.3   | 0.5   | 0.4   | 0.4   |
| Esophageal cancer                         | 0.0   | 0.0   | 0.0   | 0.0   | 0.0   | 0.0   | 0.0   | 0.0   |
| Stomach cancer                            | 0.0   | 0.0   | 0.0   | 0.0   | 0.0   | 0.0   | 0.0   | 0.0   |
| Liver cancer                              | 0.0   | 0.0   | 0.0   | 0.0   | 0.0   | 0.0   | 0.0   | 0.0   |
| Larynx cancer                             | 0.0   | 0.0   | 0.0   | 0.0   | 0.0   | 0.0   | 0.0   | 0.0   |
| Tracheal, bronchus, and lung cancer       | 0.0   | 0.0   | 0.0   | 0.0   | 0.1   | 0.1   | 0.1   | 0.1   |
| Breast cancer                             | 0.0   | 0.0   | 0.0   | 0.0   | 0.1   | 0.1   | 0.0   | 0.0   |
| Cervical cancer                           | 0.0   | 0.0   | 0.0   | 0.0   | 0.0   | 0.0   | 0.0   | 0.0   |
| Colon and rectum cancer                   | 0.0   | 0.0   | 0.0   | 0.0   | 0.0   | 0.0   | 0.0   | 0.0   |
| Lip and oral cavity cancer                | 0.0   | 0.0   | 0.0   | 0.0   | 0.0   | 0.0   | 0.0   | 0.0   |
| Nasopharynx cancer                        | 0.0   | 0.0   | 0.0   | 0.0   | 0.0   | 0.0   | 0.0   | 0.0   |
| Other pharynx cancer                      | 0.0   | 0.0   | 0.0   | 0.0   | 0.0   | 0.0   | 0.0   | 0.0   |
| Pancreatic cancer                         | 0.0   | 0.0   | 0.0   | 0.0   | 0.0   | 0.0   | 0.0   | 0.0   |
| Kidney cancer                             | 0.0   | 0.0   | 0.0   | 0.0   | 0.0   | 0.0   | 0.0   | 0.0   |
| Bladder cancer                            | 0.0   | 0.0   | 0.0   | 0.0   | 0.0   | 0.0   | 0.0   | 0.0   |
| Leukemia                                  | 0.0   | 0.0   | 0.0   | 0.0   | 0.0   | 0.0   | 0.0   | 0.0   |
| B.2 Cardiovascular diseases               | 0.1   | 0.1   | 0.2   | 0.3   | 0.6   | 0.7   | 0.8   | 0.7   |
| Ischemic heart disease                    | 0.0   | 0.0   | 0.1   | 0.2   | 0.5   | 0.6   | 0.7   | 0.6   |
| Stroke                                    | 0.0   | 0.0   | 0.1   | 0.1   | 0.1   | 0.1   | 0.1   | 0.1   |
| Atrial fibrillation and flutter           | 0.0   | 0.0   | 0.0   | 0.0   | 0.0   | 0.0   | 0.0   | 0.0   |
| Aortic aneurysm                           | 0.0   | 0.0   | 0.0   | 0.0   | 0.0   | 0.0   | 0.0   | 0.0   |
| Peripheral artery disease                 | -     | -     | 0.0   | 0.0   | 0.0   | 0.0   | 0.0   | 0.0   |
| B.3 Chronic respiratory diseases          | 0.0   | 0.0   | 0.0   | 0.0   | 0.0   | 0.0   | 0.0   | 0.1   |
| Chronic obstructive pulmonary disease     | 0.0   | 0.0   | 0.0   | 0.0   | 0.0   | 0.0   | 0.0   | 0.1   |
| Asthma                                    | 0.0   | 0.0   | 0.0   | 0.0   | 0.0   | 0.0   | 0.0   | 0.0   |
| B.4 Digestive diseases                    | 0.0   | 0.0   | 0.0   | 0.0   | 0.0   | 0.0   | 0.0   | 0.0   |
| B.5 Neurological disorders                | 0.0   | 0.0   | 0.0   | 0.0   | 0.0   | 0.0   | 0.0   | 0.1   |
| B.6 Diabetes mellitus                     | 0.0   | 0.0   | 0.0   | 0.0   | 0.1   | 0.1   | 0.2   | 0.1   |
| B.7 Musculoskeletal disorders             | 0.0   | 0.0   | 0.0   | 0.0   | 0.0   | 0.0   | 0.0   | 0.0   |
| <i>C. Injuries</i>                        | -     | -     | 0.0   | 0.0   | 0.0   | 0.0   | 0.0   | 0.0   |
| C.1 Transport injuries                    | -     | -     | 0.0   | 0.0   | 0.0   | 0.0   | 0.0   | 0.0   |
| C.2 Unintentional injuries                | -     | -     | 0.0   | 0.0   | 0.0   | 0.0   | 0.0   | 0.0   |
| C.3 Self-harm & interpersonal violence    | -     | -     | -     | 0.0   | 0.0   | 0.0   | 0.0   | 0.0   |

**Table S5: Number of deaths related to smoking, by age and disease, women (continued)**

|                                           | 30-34 | 35-39 | 40-44 | 45-49 | 50-54 | 55-59 | 60-64 | 65-69 |
|-------------------------------------------|-------|-------|-------|-------|-------|-------|-------|-------|
| <b>Saudi Arabia</b>                       |       |       |       |       |       |       |       |       |
| <i>All causes</i>                         | 3.9   | 4.9   | 12.4  | 18.6  | 27.3  | 40.4  | 53.8  | 39.8  |
| <i>A. Communicable diseases</i>           | 0.6   | 0.8   | 1.2   | 1.4   | 1.9   | 2.6   | 3.2   | 2.9   |
| A.1 Respiratory infections & tuberculosis | 0.6   | 0.8   | 1.2   | 1.4   | 1.9   | 2.6   | 3.2   | 2.9   |
| Tuberculosis                              | 0.1   | 0.3   | 0.2   | 0.3   | 0.4   | 0.4   | 0.4   | 0.4   |
| Lower respiratory infections              | 0.5   | 0.5   | 1.0   | 1.1   | 1.5   | 2.1   | 2.8   | 2.5   |
| <i>B. Non-communicable diseases</i>       | 3.3   | 4.1   | 11.0  | 17.0  | 25.1  | 37.6  | 50.3  | 36.6  |
| B.1 Neoplasms                             | 0.7   | 0.5   | 1.1   | 2.1   | 3.1   | 5.0   | 5.6   | 4.6   |
| Esophageal cancer                         | 0.0   | 0.0   | 0.0   | 0.1   | 0.3   | 0.4   | 0.4   | 0.4   |
| Stomach cancer                            | 0.0   | 0.0   | 0.0   | 0.1   | 0.1   | 0.1   | 0.2   | 0.2   |
| Liver cancer                              | 0.0   | 0.0   | 0.0   | 0.1   | 0.1   | 0.2   | 0.3   | 0.3   |
| Larynx cancer                             | 0.0   | 0.0   | 0.0   | 0.1   | 0.1   | 0.1   | 0.1   | 0.1   |
| Tracheal, bronchus, and lung cancer       | 0.1   | 0.1   | 0.2   | 0.4   | 0.7   | 1.4   | 1.7   | 1.6   |
| Breast cancer                             | 0.2   | 0.1   | 0.1   | 0.2   | 0.3   | 0.4   | 0.4   | 0.2   |
| Cervical cancer                           | 0.0   | 0.1   | 0.2   | 0.4   | 0.5   | 0.5   | 0.4   | 0.2   |
| Colon and rectum cancer                   | 0.1   | 0.0   | 0.1   | 0.2   | 0.2   | 0.4   | 0.4   | 0.3   |
| Lip and oral cavity cancer                | 0.0   | 0.0   | 0.0   | 0.1   | 0.1   | 0.2   | 0.2   | 0.2   |
| Nasopharynx cancer                        | 0.0   | 0.0   | 0.0   | 0.0   | 0.1   | 0.1   | 0.1   | 0.0   |
| Other pharynx cancer                      | 0.0   | 0.0   | 0.0   | 0.1   | 0.1   | 0.2   | 0.2   | 0.2   |
| Pancreatic cancer                         | 0.0   | 0.0   | 0.1   | 0.1   | 0.2   | 0.4   | 0.6   | 0.5   |
| Kidney cancer                             | 0.0   | 0.0   | 0.0   | 0.0   | 0.0   | 0.0   | 0.1   | 0.0   |
| Bladder cancer                            | 0.0   | 0.0   | 0.0   | 0.0   | 0.1   | 0.1   | 0.1   | 0.1   |
| Leukemia                                  | 0.2   | 0.1   | 0.2   | 0.2   | 0.3   | 0.5   | 0.5   | 0.3   |
| B.2 Cardiovascular diseases               | 2.3   | 3.3   | 9.3   | 14.0  | 20.3  | 29.2  | 39.9  | 26.9  |
| Ischemic heart disease                    | 1.7   | 2.5   | 7.3   | 11.7  | 17.1  | 24.5  | 33.2  | 21.7  |
| Stroke                                    | 0.6   | 0.8   | 2.0   | 2.3   | 3.1   | 4.5   | 6.5   | 5.1   |
| Atrial fibrillation and flutter           | 0.0   | 0.0   | 0.0   | 0.0   | 0.0   | 0.0   | 0.0   | 0.0   |
| Aortic aneurysm                           | 0.0   | 0.0   | 0.1   | 0.1   | 0.1   | 0.1   | 0.1   | 0.1   |
| Peripheral artery disease                 | -     | -     | 0.0   | 0.0   | 0.0   | 0.0   | 0.0   | 0.0   |
| B.3 Chronic respiratory diseases          | 0.2   | 0.1   | 0.3   | 0.5   | 0.9   | 2.0   | 3.0   | 3.2   |
| Chronic obstructive pulmonary disease     | 0.1   | 0.1   | 0.2   | 0.3   | 0.7   | 1.8   | 2.8   | 3.0   |
| Asthma                                    | 0.1   | 0.1   | 0.2   | 0.2   | 0.2   | 0.3   | 0.3   | 0.3   |
| B.4 Digestive diseases                    | 0.0   | 0.0   | 0.0   | 0.0   | 0.1   | 0.1   | 0.1   | 0.1   |
| B.5 Neurological disorders                | 0.0   | 0.0   | 0.0   | 0.1   | 0.1   | 0.3   | 0.6   | 0.8   |
| B.6 Diabetes mellitus                     | 0.0   | 0.1   | 0.2   | 0.3   | 0.6   | 1.0   | 1.1   | 0.9   |
| B.7 Musculoskeletal disorders             | 0.0   | 0.0   | 0.0   | 0.0   | 0.0   | 0.0   | 0.0   | 0.0   |
| <i>C. Injuries</i>                        | -     | -     | 0.2   | 0.2   | 0.3   | 0.3   | 0.3   | 0.3   |
| C.1 Transport injuries                    | -     | -     | 0.1   | 0.1   | 0.2   | 0.2   | 0.1   | 0.1   |
| C.2 Unintentional injuries                | -     | -     | 0.0   | 0.1   | 0.1   | 0.1   | 0.2   | 0.2   |
| C.3 Self-harm & interpersonal violence    | -     | -     | -     | 0.0   | 0.0   | 0.0   | 0.0   | 0.0   |



**Table S5: Number of deaths related to smoking, by age and disease, women (continued)**

|                                           | 30-34 | 35-39 | 40-44 | 45-49 | 50-54 | 55-59 | 60-64 | 65-69 |
|-------------------------------------------|-------|-------|-------|-------|-------|-------|-------|-------|
| <b>UAE</b>                                |       |       |       |       |       |       |       |       |
| <i>All causes</i>                         | 1.9   | 2.2   | 4.8   | 10.3  | 9.1   | 11.7  | 10.6  | 13.3  |
| <i>A. Communicable diseases</i>           | 0.2   | 0.1   | 0.2   | 0.2   | 0.2   | 0.2   | 0.3   | 0.7   |
| A.1 Respiratory infections & tuberculosis | 0.2   | 0.1   | 0.2   | 0.2   | 0.2   | 0.2   | 0.3   | 0.7   |
| Tuberculosis                              | 0.0   | 0.0   | 0.0   | 0.0   | 0.0   | 0.0   | 0.1   | 0.0   |
| Lower respiratory infections              | 0.1   | 0.1   | 0.2   | 0.2   | 0.1   | 0.2   | 0.2   | 0.6   |
| <i>B. Non-communicable diseases</i>       | 1.7   | 2.0   | 4.5   | 10.0  | 8.8   | 11.5  | 10.2  | 12.6  |
| B.1 Neoplasms                             | 0.2   | 0.5   | 1.0   | 2.5   | 2.3   | 3.8   | 3.0   | 2.5   |
| Esophageal cancer                         | 0.0   | 0.1   | 0.1   | 0.2   | 0.3   | 0.2   | 0.6   | 0.3   |
| Stomach cancer                            | 0.0   | 0.0   | 0.0   | 0.1   | 0.1   | 0.1   | 0.1   | 0.1   |
| Liver cancer                              | 0.0   | 0.0   | 0.0   | 0.0   | 0.0   | 0.1   | 0.0   | 0.1   |
| Larynx cancer                             | 0.0   | 0.0   | 0.0   | 0.1   | 0.1   | 0.2   | 0.2   | 0.1   |
| Tracheal, bronchus, and lung cancer       | 0.0   | 0.0   | 0.2   | 0.5   | 0.7   | 1.3   | 0.7   | 0.7   |
| Breast cancer                             | 0.0   | 0.0   | 0.1   | 0.4   | 0.3   | 0.4   | 0.1   | 0.1   |
| Cervical cancer                           | 0.1   | 0.2   | 0.2   | 0.4   | 0.2   | 0.6   | 0.7   | 0.4   |
| Colon and rectum cancer                   | 0.0   | 0.0   | 0.1   | 0.2   | 0.2   | 0.2   | 0.1   | 0.2   |
| Lip and oral cavity cancer                | 0.0   | 0.0   | 0.0   | 0.1   | 0.0   | 0.0   | 0.0   | 0.0   |
| Nasopharynx cancer                        | 0.0   | 0.0   | 0.0   | 0.0   | 0.0   | 0.0   | 0.0   | 0.0   |
| Other pharynx cancer                      | 0.0   | 0.0   | 0.0   | 0.0   | 0.0   | 0.0   | 0.0   | 0.0   |
| Pancreatic cancer                         | 0.0   | 0.0   | 0.1   | 0.2   | 0.2   | 0.2   | 0.2   | 0.3   |
| Kidney cancer                             | 0.0   | 0.0   | 0.0   | 0.0   | 0.0   | 0.0   | 0.0   | 0.0   |
| Bladder cancer                            | 0.0   | 0.0   | 0.0   | 0.0   | 0.0   | 0.1   | 0.1   | 0.1   |
| Leukemia                                  | 0.0   | 0.0   | 0.1   | 0.3   | 0.2   | 0.3   | 0.2   | 0.1   |
| B.2 Cardiovascular diseases               | 1.4   | 1.3   | 2.9   | 6.6   | 5.6   | 6.2   | 5.2   | 7.8   |
| Ischemic heart disease                    | 0.6   | 0.4   | 1.1   | 2.9   | 3.6   | 4.3   | 3.8   | 5.8   |
| Stroke                                    | 0.7   | 0.8   | 1.7   | 3.6   | 1.8   | 1.8   | 1.3   | 1.9   |
| Atrial fibrillation and flutter           | 0.0   | 0.0   | 0.0   | 0.0   | 0.0   | 0.0   | 0.0   | 0.0   |
| Aortic aneurysm                           | 0.0   | 0.0   | 0.1   | 0.1   | 0.1   | 0.1   | 0.0   | 0.0   |
| Peripheral artery disease                 | -     | -     | 0.0   | 0.0   | 0.0   | 0.0   | 0.0   | 0.0   |
| B.3 Chronic respiratory diseases          | 0.1   | 0.2   | 0.5   | 0.7   | 0.5   | 1.1   | 0.7   | 1.3   |
| Chronic obstructive pulmonary disease     | 0.1   | 0.1   | 0.3   | 0.4   | 0.4   | 0.9   | 0.6   | 1.1   |
| Asthma                                    | 0.1   | 0.1   | 0.2   | 0.2   | 0.1   | 0.2   | 0.1   | 0.2   |
| B.4 Digestive diseases                    | 0.0   | 0.0   | 0.0   | 0.0   | 0.0   | 0.0   | 0.0   | 0.1   |
| B.5 Neurological disorders                | 0.0   | 0.0   | 0.0   | 0.0   | 0.1   | 0.1   | 0.1   | 0.4   |
| B.6 Diabetes mellitus                     | 0.0   | 0.1   | 0.1   | 0.1   | 0.3   | 0.2   | 1.1   | 0.6   |
| B.7 Musculoskeletal disorders             | 0.0   | 0.0   | 0.0   | 0.0   | 0.0   | 0.0   | 0.0   | 0.0   |
| <i>C. Injuries</i>                        | -     | -     | 0.1   | 0.1   | 0.1   | 0.0   | 0.1   | 0.1   |
| C.1 Transport injuries                    | -     | -     | 0.1   | 0.1   | 0.1   | 0.0   | 0.1   | 0.1   |
| C.2 Unintentional injuries                | -     | -     | 0.0   | 0.0   | 0.0   | 0.0   | 0.0   | 0.0   |
| C.3 Self-harm & interpersonal violence    | -     | -     | -     | 0.0   | 0.0   | 0.0   | 0.0   | 0.0   |

Source: GBD Study, IHME

**Table S6: Number of YLD related to SHS exposure, by age and disease, men**

|                                           | 15-19 | 20-24 | 25-29 | 30-34 | 35-39 | 40-44 | 45-49 | 50-54 | 55-59 | 60-64 | 65-69 |
|-------------------------------------------|-------|-------|-------|-------|-------|-------|-------|-------|-------|-------|-------|
| <b><u>Bahrain</u></b>                     |       |       |       |       |       |       |       |       |       |       |       |
| <i>All causes</i>                         | 0.6   | 0.4   | 28.3  | 55.4  | 79.3  | 112.2 | 115.0 | 117.2 | 123.3 | 88.7  | 41.8  |
| <i>A. Communicable diseases</i>           | 0.6   | 0.4   | 0.4   | 0.5   | 0.4   | 0.4   | 0.3   | 0.2   | 0.2   | 0.1   | 0.1   |
| A.1 Respiratory infections & tuberculosis | 0.6   | 0.4   | 0.4   | 0.5   | 0.4   | 0.4   | 0.3   | 0.2   | 0.2   | 0.1   | 0.1   |
| Lower respiratory infections              | 0.6   | 0.4   | 0.4   | 0.5   | 0.4   | 0.4   | 0.3   | 0.2   | 0.2   | 0.1   | 0.1   |
| <i>B. Non-communicable diseases</i>       | -     | -     | 27.8  | 54.9  | 78.9  | 111.9 | 114.7 | 117.0 | 123.1 | 88.6  | 41.8  |
| B.1 Neoplasms                             | -     | -     | 0.0   | 0.0   | 0.0   | 0.0   | 0.0   | 0.1   | 0.1   | 0.2   | 0.1   |
| Tracheal, bronchus, and lung cancer       | -     | -     | 0.0   | 0.0   | 0.0   | 0.0   | 0.0   | 0.1   | 0.1   | 0.2   | 0.1   |
| Breast cancer                             | -     | -     | 0.0   | 0.0   | 0.0   | 0.0   | 0.0   | 0.0   | 0.0   | 0.0   | 0.0   |
| B.2 Cardiovascular diseases               | -     | -     | 1.1   | 2.0   | 2.8   | 4.1   | 4.5   | 4.9   | 5.3   | 3.9   | 1.8   |
| Ischemic heart disease                    | -     | -     | 0.1   | 0.3   | 0.6   | 1.0   | 1.2   | 1.1   | 1.1   | 0.8   | 0.4   |
| Stroke                                    | -     | -     | 1.0   | 1.6   | 2.2   | 3.1   | 3.4   | 3.7   | 4.2   | 3.1   | 1.5   |
| B.3 Chronic respiratory diseases          | -     | -     | 9.9   | 18.1  | 23.5  | 30.0  | 27.7  | 26.6  | 27.6  | 20.6  | 10.6  |
| Chronic obstructive pulmonary disease     | -     | -     | 9.9   | 18.1  | 23.5  | 30.0  | 27.7  | 26.6  | 27.6  | 20.6  | 10.6  |
| B.6 Diabetes mellitus                     | -     | -     | 16.9  | 34.9  | 52.6  | 77.8  | 82.4  | 85.5  | 90.0  | 63.9  | 29.2  |
| <b><u>Kuwait</u></b>                      |       |       |       |       |       |       |       |       |       |       |       |
| <i>All causes</i>                         | 1.8   | 1.5   | 99.4  | 138.7 | 150.5 | 163.3 | 183.3 | 179.4 | 151.2 | 121.0 | 79.8  |
| <i>A. Communicable diseases</i>           | 1.8   | 1.5   | 1.6   | 1.4   | 0.9   | 0.7   | 0.6   | 0.5   | 0.4   | 0.3   | 0.3   |
| A.1 Respiratory infections & tuberculosis | 1.8   | 1.5   | 1.6   | 1.4   | 0.9   | 0.7   | 0.6   | 0.5   | 0.4   | 0.3   | 0.3   |
| Lower respiratory infections              | 1.8   | 1.5   | 1.6   | 1.4   | 0.9   | 0.7   | 0.6   | 0.5   | 0.4   | 0.3   | 0.3   |
| <i>B. Non-communicable diseases</i>       | -     | -     | 97.8  | 137.3 | 149.6 | 162.6 | 182.6 | 178.9 | 150.8 | 120.7 | 79.5  |
| B.1 Neoplasms                             | -     | -     | 0.0   | 0.0   | 0.0   | 0.1   | 0.1   | 0.2   | 0.2   | 0.2   | 0.2   |
| Tracheal, bronchus, and lung cancer       | -     | -     | 0.0   | 0.0   | 0.0   | 0.1   | 0.1   | 0.2   | 0.2   | 0.2   | 0.2   |
| Breast cancer                             | -     | -     | 0.0   | 0.0   | 0.0   | 0.0   | 0.0   | 0.0   | 0.0   | 0.0   | 0.0   |
| B.2 Cardiovascular diseases               | -     | -     | 4.0   | 5.1   | 5.8   | 6.9   | 9.1   | 10.2  | 9.6   | 8.1   | 5.6   |
| Ischemic heart disease                    | -     | -     | 0.4   | 0.8   | 1.2   | 1.6   | 2.2   | 2.2   | 1.9   | 1.5   | 1.1   |
| Stroke                                    | -     | -     | 3.6   | 4.3   | 4.7   | 5.3   | 7.0   | 8.0   | 7.7   | 6.6   | 4.5   |
| B.3 Chronic respiratory diseases          | -     | -     | 30.6  | 40.6  | 41.4  | 42.8  | 46.8  | 46.0  | 39.4  | 32.6  | 22.3  |
| Chronic obstructive pulmonary disease     | -     | -     | 30.6  | 40.6  | 41.4  | 42.8  | 46.8  | 46.0  | 39.4  | 32.6  | 22.3  |
| B.6 Diabetes mellitus                     | -     | -     | 63.2  | 91.6  | 102.3 | 112.9 | 126.6 | 122.5 | 101.6 | 79.7  | 51.4  |

**Table S6: Number of YLD related to SHS exposure, by age and disease, men (continued)**

|                                           | 15-19 | 20-24 | 25-29 | 30-34 | 35-39 | 40-44 | 45-49 | 50-54 | 55-59 | 60-64 | 65-69 |
|-------------------------------------------|-------|-------|-------|-------|-------|-------|-------|-------|-------|-------|-------|
| <b>Oman</b>                               |       |       |       |       |       |       |       |       |       |       |       |
| <i>All causes</i>                         | 1.8   | 2.4   | 174.4 | 182.6 | 163.0 | 168.2 | 172.2 | 164.7 | 158.7 | 100.4 | 58.3  |
| <i>A. Communicable diseases</i>           | 1.8   | 2.4   | 3.4   | 2.1   | 1.1   | 0.7   | 0.6   | 0.5   | 0.4   | 0.3   | 0.2   |
| A.1 Respiratory infections & tuberculosis | 1.8   | 2.4   | 3.4   | 2.1   | 1.1   | 0.7   | 0.6   | 0.5   | 0.4   | 0.3   | 0.2   |
| Lower respiratory infections              | 1.8   | 2.4   | 3.4   | 2.1   | 1.1   | 0.7   | 0.6   | 0.5   | 0.4   | 0.3   | 0.2   |
| <i>B. Non-communicable diseases</i>       | -     | -     | 171.0 | 180.5 | 162.0 | 167.5 | 171.6 | 164.2 | 158.3 | 100.2 | 58.1  |
| B.1 Neoplasms                             | -     | -     | 0.0   | 0.0   | 0.0   | 0.0   | 0.1   | 0.1   | 0.2   | 0.2   | 0.1   |
| Tracheal, bronchus, and lung cancer       | -     | -     | 0.0   | 0.0   | 0.0   | 0.0   | 0.1   | 0.1   | 0.2   | 0.2   | 0.1   |
| Breast cancer                             | -     | -     | 0.0   | 0.0   | 0.0   | 0.0   | 0.0   | 0.0   | 0.0   | 0.0   | 0.0   |
| B.2 Cardiovascular diseases               | -     | -     | 9.3   | 8.3   | 7.2   | 7.6   | 8.6   | 9.1   | 9.8   | 6.6   | 4.0   |
| Ischemic heart disease                    | -     | -     | 0.9   | 1.2   | 1.4   | 1.9   | 2.2   | 2.2   | 2.1   | 1.4   | 0.9   |
| Stroke                                    | -     | -     | 8.4   | 7.1   | 5.7   | 5.7   | 6.4   | 6.9   | 7.7   | 5.3   | 3.1   |
| B.3 Chronic respiratory diseases          | -     | -     | 44.0  | 43.2  | 35.4  | 33.9  | 32.8  | 30.6  | 30.4  | 20.5  | 13.1  |
| Chronic obstructive pulmonary disease     | -     | -     | 44.0  | 43.2  | 35.4  | 33.9  | 32.8  | 30.6  | 30.4  | 20.5  | 13.1  |
| B.6 Diabetes mellitus                     | -     | -     | 117.8 | 129.0 | 119.3 | 126.0 | 130.1 | 124.5 | 117.9 | 72.8  | 40.9  |
| <b>Qatar</b>                              |       |       |       |       |       |       |       |       |       |       |       |
| <i>All causes</i>                         | 0.6   | 1.4   | 129.8 | 155.9 | 139.8 | 120.5 | 173.4 | 139.5 | 140.7 | 84.3  | 41.6  |
| <i>A. Communicable diseases</i>           | 0.6   | 1.4   | 1.5   | 1.0   | 0.5   | 0.3   | 0.3   | 0.2   | 0.2   | 0.1   | 0.0   |
| A.1 Respiratory infections & tuberculosis | 0.6   | 1.4   | 1.5   | 1.0   | 0.5   | 0.3   | 0.3   | 0.2   | 0.2   | 0.1   | 0.0   |
| Lower respiratory infections              | 0.6   | 1.4   | 1.5   | 1.0   | 0.5   | 0.3   | 0.3   | 0.2   | 0.2   | 0.1   | 0.0   |
| <i>B. Non-communicable diseases</i>       | -     | -     | 128.3 | 154.9 | 139.3 | 120.2 | 173.0 | 139.3 | 140.6 | 84.2  | 41.5  |
| B.1 Neoplasms                             | -     | -     | 0.0   | 0.0   | 0.0   | 0.0   | 0.1   | 0.1   | 0.1   | 0.2   | 0.1   |
| Tracheal, bronchus, and lung cancer       | -     | -     | 0.0   | 0.0   | 0.0   | 0.0   | 0.1   | 0.1   | 0.1   | 0.2   | 0.1   |
| Breast cancer                             | -     | -     | 0.0   | 0.0   | 0.0   | 0.0   | 0.0   | 0.0   | 0.0   | 0.0   | 0.0   |
| B.2 Cardiovascular diseases               | -     | -     | 4.6   | 4.8   | 4.4   | 4.0   | 6.5   | 5.7   | 6.1   | 3.7   | 1.8   |
| Ischemic heart disease                    | -     | -     | 0.4   | 0.7   | 0.8   | 0.8   | 1.4   | 1.2   | 1.1   | 0.6   | 0.3   |
| Stroke                                    | -     | -     | 4.2   | 4.2   | 3.7   | 3.2   | 5.1   | 4.6   | 5.0   | 3.1   | 1.5   |
| B.3 Chronic respiratory diseases          | -     | -     | 35.3  | 39.7  | 32.8  | 26.3  | 35.2  | 27.1  | 26.5  | 15.9  | 8.2   |
| Chronic obstructive pulmonary disease     | -     | -     | 35.3  | 39.7  | 32.8  | 26.3  | 35.2  | 27.1  | 26.5  | 15.9  | 8.2   |
| B.6 Diabetes mellitus                     | -     | -     | 88.3  | 110.3 | 102.0 | 89.8  | 131.3 | 106.4 | 107.8 | 64.4  | 31.4  |

**Table S6: Number of YLD related to SHS exposure, by age and disease, men (continued)**

|                                           | 15-19 | 20-24 | 25-29 | 30-34 | 35-39   | 40-44   | 45-49   | 50-54   | 55-59 | 60-64 | 65-69 |
|-------------------------------------------|-------|-------|-------|-------|---------|---------|---------|---------|-------|-------|-------|
| <b><u>Saudi Arabia</u></b>                |       |       |       |       |         |         |         |         |       |       |       |
| <i>All causes</i>                         | 10.1  | 7.1   | 721.1 | 851.8 | 1,000.6 | 1,066.0 | 1,060.8 | 1,037.0 | 932.7 | 780.6 | 539.2 |
| <i>A. Communicable diseases</i>           | 10.1  | 7.1   | 6.0   | 4.5   | 3.5     | 2.7     | 2.3     | 1.9     | 1.5   | 1.2   | 0.8   |
| A.1 Respiratory infections & tuberculosis | 10.1  | 7.1   | 6.0   | 4.5   | 3.5     | 2.7     | 2.3     | 1.9     | 1.5   | 1.2   | 0.8   |
| Lower respiratory infections              | 10.1  | 7.1   | 6.0   | 4.5   | 3.5     | 2.7     | 2.3     | 1.9     | 1.5   | 1.2   | 0.8   |
| <i>B. Non-communicable diseases</i>       | -     | -     | 715.2 | 847.3 | 997.2   | 1,063.3 | 1,058.5 | 1,035.1 | 931.2 | 779.4 | 538.3 |
| B.1 Neoplasms                             | -     | -     | 0.1   | 0.1   | 0.2     | 0.3     | 0.5     | 0.7     | 0.9   | 1.1   | 1.0   |
| Tracheal, bronchus, and lung cancer       | -     | -     | 0.0   | 0.1   | 0.1     | 0.2     | 0.4     | 0.6     | 0.8   | 1.0   | 1.0   |
| Breast cancer                             | -     | -     | 0.0   | 0.0   | 0.0     | 0.1     | 0.1     | 0.1     | 0.1   | 0.1   | 0.1   |
| B.2 Cardiovascular diseases               | -     | -     | 25.7  | 27.5  | 33.8    | 39.2    | 46.2    | 51.5    | 52.0  | 47.0  | 34.0  |
| Ischemic heart disease                    | -     | -     | 2.6   | 4.3   | 6.7     | 9.0     | 11.0    | 11.2    | 10.1  | 8.8   | 6.7   |
| Stroke                                    | -     | -     | 23.1  | 23.2  | 27.2    | 30.2    | 35.2    | 40.3    | 41.9  | 38.2  | 27.3  |
| B.3 Chronic respiratory diseases          | -     | -     | 105.1 | 122.9 | 140.0   | 147.7   | 148.0   | 152.1   | 145.5 | 132.6 | 100.5 |
| Chronic obstructive pulmonary disease     | -     | -     | 105.1 | 122.9 | 140.0   | 147.7   | 148.0   | 152.1   | 145.5 | 132.6 | 100.5 |
| B.6 Diabetes mellitus                     | -     | -     | 584.3 | 696.9 | 823.2   | 876.1   | 863.8   | 830.8   | 732.8 | 598.7 | 402.8 |
| <b><u>UAE</u></b>                         |       |       |       |       |         |         |         |         |       |       |       |
| <i>All causes</i>                         | 1.3   | 1.0   | 397.4 | 806.9 | 1,037.2 | 945.7   | 860.6   | 703.1   | 415.5 | 334.7 | 99.4  |
| <i>A. Communicable diseases</i>           | 1.3   | 1.0   | 3.1   | 3.7   | 2.8     | 1.8     | 1.3     | 0.9     | 0.5   | 0.4   | 0.1   |
| A.1 Respiratory infections & tuberculosis | 1.3   | 1.0   | 3.1   | 3.7   | 2.8     | 1.8     | 1.3     | 0.9     | 0.5   | 0.4   | 0.1   |
| Lower respiratory infections              | 1.3   | 1.0   | 3.1   | 3.7   | 2.8     | 1.8     | 1.3     | 0.9     | 0.5   | 0.4   | 0.1   |
| <i>B. Non-communicable diseases</i>       | -     | -     | 394.3 | 803.2 | 1,034.4 | 944.0   | 859.2   | 702.3   | 415.0 | 334.3 | 99.3  |
| B.1 Neoplasms                             | -     | -     | 0.0   | 0.1   | 0.2     | 0.3     | 0.4     | 0.4     | 0.5   | 0.9   | 0.3   |
| Tracheal, bronchus, and lung cancer       | -     | -     | 0.0   | 0.1   | 0.1     | 0.2     | 0.3     | 0.4     | 0.5   | 0.8   | 0.2   |
| Breast cancer                             | -     | -     | 0.0   | 0.0   | 0.0     | 0.1     | 0.1     | 0.0     | 0.0   | 0.0   | 0.0   |
| B.2 Cardiovascular diseases               | -     | -     | 14.9  | 27.4  | 35.2    | 33.6    | 33.7    | 30.8    | 20.5  | 17.8  | 5.7   |
| Ischemic heart disease                    | -     | -     | 1.0   | 2.8   | 4.6     | 5.2     | 5.4     | 4.3     | 2.5   | 2.0   | 0.7   |
| Stroke                                    | -     | -     | 13.9  | 24.6  | 30.6    | 28.4    | 28.3    | 26.5    | 18.0  | 15.8  | 5.0   |
| B.3 Chronic respiratory diseases          | -     | -     | 150.5 | 278.8 | 323.8   | 268.0   | 220.0   | 165.7   | 95.2  | 76.0  | 23.4  |
| Chronic obstructive pulmonary disease     | -     | -     | 150.5 | 278.8 | 323.8   | 268.0   | 220.0   | 165.7   | 95.2  | 76.0  | 23.4  |
| B.6 Diabetes mellitus                     | -     | -     | 228.9 | 497.0 | 675.2   | 642.1   | 605.2   | 505.4   | 298.8 | 239.6 | 70.0  |

Source: GBD Study, IHME

**Table S7: Number of YLD related to SHS exposure, by age and disease, women**

|                                           | 15-19 | 20-24 | 25-29 | 30-34 | 35-39 | 40-44 | 45-49 | 50-54 | 55-59 | 60-64 | 65-69 |
|-------------------------------------------|-------|-------|-------|-------|-------|-------|-------|-------|-------|-------|-------|
| <b><u>Bahrain</u></b>                     |       |       |       |       |       |       |       |       |       |       |       |
| <i>All causes</i>                         | 0.5   | 0.3   | 26.3  | 39.0  | 54.2  | 58.9  | 74.5  | 82.5  | 78.6  | 54.1  | 29.9  |
| <i>A. Communicable diseases</i>           | 0.5   | 0.3   | 0.3   | 0.3   | 0.3   | 0.2   | 0.2   | 0.2   | 0.1   | 0.1   | 0.0   |
| A.1 Respiratory infections & tuberculosis | 0.5   | 0.3   | 0.3   | 0.3   | 0.3   | 0.2   | 0.2   | 0.2   | 0.1   | 0.1   | 0.0   |
| Lower respiratory infections              | 0.5   | 0.3   | 0.3   | 0.3   | 0.3   | 0.2   | 0.2   | 0.2   | 0.1   | 0.1   | 0.0   |
| <i>B. Non-communicable diseases</i>       | -     | -     | 26.0  | 38.7  | 53.9  | 58.7  | 74.3  | 82.3  | 78.5  | 54.1  | 29.9  |
| B.1 Neoplasms                             | -     | -     | 0.0   | 0.2   | 0.3   | 0.4   | 0.6   | 0.6   | 0.6   | 0.3   | 0.2   |
| Tracheal, bronchus, and lung cancer       | -     | -     | 0.0   | 0.0   | 0.0   | 0.0   | 0.0   | 0.0   | 0.0   | 0.0   | 0.0   |
| Breast cancer                             | -     | -     | 0.0   | 0.2   | 0.3   | 0.4   | 0.6   | 0.6   | 0.5   | 0.3   | 0.2   |
| B.2 Cardiovascular diseases               | -     | -     | 1.0   | 1.4   | 2.0   | 2.3   | 3.1   | 3.7   | 3.8   | 2.7   | 1.6   |
| Ischemic heart disease                    | -     | -     | 0.1   | 0.1   | 0.2   | 0.3   | 0.4   | 0.5   | 0.5   | 0.3   | 0.2   |
| Stroke                                    | -     | -     | 1.0   | 1.3   | 1.8   | 2.0   | 2.7   | 3.2   | 3.3   | 2.4   | 1.3   |
| B.3 Chronic respiratory diseases          | -     | -     | 13.3  | 17.9  | 21.3  | 19.6  | 20.7  | 20.1  | 17.9  | 12.2  | 7.2   |
| Chronic obstructive pulmonary disease     | -     | -     | 13.3  | 17.9  | 21.3  | 19.6  | 20.7  | 20.1  | 17.9  | 12.2  | 7.2   |
| B.6 Diabetes mellitus                     | -     | -     | 11.6  | 19.2  | 30.3  | 36.4  | 49.9  | 57.9  | 56.3  | 38.8  | 20.9  |
| <b><u>Kuwait</u></b>                      |       |       |       |       |       |       |       |       |       |       |       |
| <i>All causes</i>                         | 2.3   | 2.0   | 193.9 | 287.9 | 308.6 | 335.5 | 328.3 | 255.9 | 178.6 | 116.5 | 75.3  |
| <i>A. Communicable diseases</i>           | 2.3   | 2.0   | 2.8   | 2.7   | 1.9   | 1.5   | 1.3   | 0.9   | 0.5   | 0.4   | 0.3   |
| A.1 Respiratory infections & tuberculosis | 2.3   | 2.0   | 2.8   | 2.7   | 1.9   | 1.5   | 1.3   | 0.9   | 0.5   | 0.4   | 0.3   |
| Lower respiratory infections              | 2.3   | 2.0   | 2.8   | 2.7   | 1.9   | 1.5   | 1.3   | 0.9   | 0.5   | 0.4   | 0.3   |
| <i>B. Non-communicable diseases</i>       | -     | -     | 191.1 | 285.1 | 306.7 | 334.0 | 327.0 | 255.0 | 178.1 | 116.1 | 75.0  |
| B.1 Neoplasms                             | -     | -     | 0.5   | 1.2   | 1.7   | 2.5   | 3.1   | 2.1   | 1.6   | 1.0   | 0.6   |
| Tracheal, bronchus, and lung cancer       | -     | -     | 0.0   | 0.0   | 0.1   | 0.1   | 0.1   | 0.1   | 0.1   | 0.1   | 0.1   |
| Breast cancer                             | -     | -     | 0.5   | 1.1   | 1.6   | 2.4   | 3.0   | 2.0   | 1.5   | 0.9   | 0.5   |
| B.2 Cardiovascular diseases               | -     | -     | 9.7   | 13.1  | 14.3  | 16.8  | 19.2  | 17.5  | 14.0  | 9.9   | 6.7   |
| Ischemic heart disease                    | -     | -     | 0.6   | 1.2   | 1.6   | 2.2   | 2.6   | 2.2   | 1.7   | 1.2   | 0.8   |
| Stroke                                    | -     | -     | 9.1   | 11.9  | 12.7  | 14.6  | 16.6  | 15.2  | 12.3  | 8.7   | 5.9   |
| B.3 Chronic respiratory diseases          | -     | -     | 89.0  | 121.2 | 115.6 | 111.3 | 98.1  | 72.0  | 48.6  | 31.4  | 20.9  |
| Chronic obstructive pulmonary disease     | -     | -     | 89.0  | 121.2 | 115.6 | 111.3 | 98.1  | 72.0  | 48.6  | 31.4  | 20.9  |
| B.6 Diabetes mellitus                     | -     | -     | 91.9  | 149.7 | 175.1 | 203.4 | 206.6 | 163.4 | 114.0 | 73.8  | 46.8  |

**Table S7: Number of YLD related to SHS exposure, by age and disease, women (continued)**

|                                           | 15-19 | 20-24 | 25-29 | 30-34 | 35-39 | 40-44 | 45-49 | 50-54 | 55-59 | 60-64 | 65-69 |
|-------------------------------------------|-------|-------|-------|-------|-------|-------|-------|-------|-------|-------|-------|
| <b>Oman</b>                               |       |       |       |       |       |       |       |       |       |       |       |
| <i>All causes</i>                         | 1.9   | 1.4   | 89.5  | 103.6 | 114.4 | 116.7 | 113.1 | 112.2 | 112.5 | 85.2  | 61.5  |
| <i>A. Communicable diseases</i>           | 1.9   | 1.4   | 1.6   | 1.1   | 0.8   | 0.5   | 0.4   | 0.3   | 0.3   | 0.2   | 0.2   |
| A.1 Respiratory infections & tuberculosis | 1.9   | 1.4   | 1.6   | 1.1   | 0.8   | 0.5   | 0.4   | 0.3   | 0.3   | 0.2   | 0.2   |
| Lower respiratory infections              | 1.9   | 1.4   | 1.6   | 1.1   | 0.8   | 0.5   | 0.4   | 0.3   | 0.3   | 0.2   | 0.2   |
| <i>B. Non-communicable diseases</i>       | -     | -     | 87.9  | 102.5 | 113.7 | 116.2 | 112.7 | 111.9 | 112.2 | 85.0  | 61.3  |
| B.1 Neoplasms                             | -     | -     | 0.2   | 0.5   | 0.6   | 0.9   | 1.0   | 0.7   | 0.6   | 0.4   | 0.3   |
| Tracheal, bronchus, and lung cancer       | -     | -     | 0.0   | 0.0   | 0.0   | 0.0   | 0.1   | 0.1   | 0.1   | 0.1   | 0.0   |
| Breast cancer                             | -     | -     | 0.2   | 0.5   | 0.6   | 0.9   | 0.9   | 0.7   | 0.5   | 0.4   | 0.2   |
| B.2 Cardiovascular diseases               | -     | -     | 5.0   | 5.1   | 5.3   | 5.3   | 5.6   | 6.3   | 7.3   | 6.1   | 4.7   |
| Ischemic heart disease                    | -     | -     | 0.3   | 0.4   | 0.6   | 0.7   | 0.8   | 0.9   | 1.0   | 0.8   | 0.7   |
| Stroke                                    | -     | -     | 4.8   | 4.6   | 4.7   | 4.6   | 4.8   | 5.4   | 6.3   | 5.3   | 4.0   |
| B.3 Chronic respiratory diseases          | -     | -     | 33.1  | 34.4  | 31.8  | 27.0  | 22.5  | 20.2  | 19.9  | 15.4  | 12.0  |
| Chronic obstructive pulmonary disease     | -     | -     | 33.1  | 34.4  | 31.8  | 27.0  | 22.5  | 20.2  | 19.9  | 15.4  | 12.0  |
| B.6 Diabetes mellitus                     | -     | -     | 49.6  | 62.5  | 76.0  | 83.0  | 83.6  | 84.6  | 84.5  | 63.0  | 44.4  |
| <b>Qatar</b>                              |       |       |       |       |       |       |       |       |       |       |       |
| <i>All causes</i>                         | 0.5   | 0.4   | 56.2  | 82.3  | 94.2  | 93.4  | 87.1  | 75.8  | 60.5  | 38.5  | 20.2  |
| <i>A. Communicable diseases</i>           | 0.5   | 0.4   | 0.7   | 0.6   | 0.4   | 0.3   | 0.2   | 0.1   | 0.1   | 0.0   | 0.0   |
| A.1 Respiratory infections & tuberculosis | 0.5   | 0.4   | 0.7   | 0.6   | 0.4   | 0.3   | 0.2   | 0.1   | 0.1   | 0.0   | 0.0   |
| Lower respiratory infections              | 0.5   | 0.4   | 0.7   | 0.6   | 0.4   | 0.3   | 0.2   | 0.1   | 0.1   | 0.0   | 0.0   |
| <i>B. Non-communicable diseases</i>       | -     | -     | 55.6  | 81.6  | 93.7  | 93.1  | 86.9  | 75.7  | 60.4  | 38.5  | 20.2  |
| B.1 Neoplasms                             | -     | -     | 0.1   | 0.4   | 0.7   | 1.0   | 0.9   | 1.1   | 0.9   | 0.5   | 0.3   |
| Tracheal, bronchus, and lung cancer       | -     | -     | 0.0   | 0.0   | 0.0   | 0.0   | 0.0   | 0.0   | 0.0   | 0.0   | 0.0   |
| Breast cancer                             | -     | -     | 0.1   | 0.4   | 0.7   | 1.0   | 0.9   | 1.0   | 0.8   | 0.5   | 0.3   |
| B.2 Cardiovascular diseases               | -     | -     | 2.1   | 2.8   | 3.2   | 3.3   | 3.4   | 3.3   | 2.8   | 1.8   | 1.0   |
| Ischemic heart disease                    | -     | -     | 0.1   | 0.2   | 0.3   | 0.4   | 0.4   | 0.4   | 0.3   | 0.2   | 0.1   |
| Stroke                                    | -     | -     | 2.0   | 2.6   | 2.9   | 3.0   | 3.0   | 2.9   | 2.5   | 1.6   | 0.9   |
| B.3 Chronic respiratory diseases          | -     | -     | 22.3  | 29.4  | 28.8  | 24.4  | 19.5  | 15.0  | 11.0  | 6.7   | 3.6   |
| Chronic obstructive pulmonary disease     | -     | -     | 22.3  | 29.4  | 28.8  | 24.4  | 19.5  | 15.0  | 11.0  | 6.7   | 3.6   |
| B.6 Diabetes mellitus                     | -     | -     | 31.1  | 49.0  | 60.9  | 64.4  | 63.1  | 56.3  | 45.8  | 29.4  | 15.3  |

**Table S7: Number of YLD related to SHS exposure, by age and disease, women (continued)**

|                                           | 15-19 | 20-24 | 25-29 | 30-34   | 35-39   | 40-44   | 45-49   | 50-54   | 55-59 | 60-64 | 65-69 |
|-------------------------------------------|-------|-------|-------|---------|---------|---------|---------|---------|-------|-------|-------|
| <b>Saudi Arabia</b>                       |       |       |       |         |         |         |         |         |       |       |       |
| <i>All causes</i>                         | 9.8   | 7.0   | 846.6 | 1,129.1 | 1,406.1 | 1,565.9 | 1,496.6 | 1,282.6 | 999.3 | 688.2 | 409.0 |
| <i>A. Communicable diseases</i>           | 9.8   | 7.0   | 7.3   | 6.8     | 5.8     | 5.0     | 3.9     | 2.9     | 2.0   | 1.3   | 0.8   |
| A.1 Respiratory infections & tuberculosis | 9.8   | 7.0   | 7.3   | 6.8     | 5.8     | 5.0     | 3.9     | 2.9     | 2.0   | 1.3   | 0.8   |
| Lower respiratory infections              | 9.8   | 7.0   | 7.3   | 6.8     | 5.8     | 5.0     | 3.9     | 2.9     | 2.0   | 1.3   | 0.8   |
| <i>B. Non-communicable diseases</i>       | -     | -     | 839.3 | 1,122.3 | 1,400.2 | 1,560.9 | 1,492.7 | 1,279.7 | 997.3 | 686.9 | 408.1 |
| B.1 Neoplasms                             | -     | -     | 2.2   | 6.9     | 13.3    | 18.8    | 21.2    | 15.7    | 11.2  | 7.0   | 3.4   |
| Tracheal, bronchus, and lung cancer       | -     | -     | 0.0   | 0.1     | 0.2     | 0.3     | 0.4     | 0.4     | 0.3   | 0.3   | 0.2   |
| Breast cancer                             | -     | -     | 2.1   | 6.8     | 13.0    | 18.5    | 20.8    | 15.3    | 10.8  | 6.7   | 3.2   |
| B.2 Cardiovascular diseases               | -     | -     | 42.5  | 49.8    | 62.4    | 73.3    | 82.0    | 82.7    | 75.1  | 56.8  | 36.3  |
| Ischemic heart disease                    | -     | -     | 2.3   | 3.9     | 6.2     | 8.8     | 10.5    | 10.1    | 8.5   | 6.6   | 4.7   |
| Stroke                                    | -     | -     | 40.3  | 45.8    | 56.2    | 64.5    | 71.4    | 72.6    | 66.5  | 50.2  | 31.6  |
| B.3 Chronic respiratory diseases          | -     | -     | 230.8 | 287.6   | 316.1   | 310.6   | 270.6   | 224.8   | 176.7 | 128.0 | 82.3  |
| Chronic obstructive pulmonary disease     | -     | -     | 230.8 | 287.6   | 316.1   | 310.6   | 270.6   | 224.8   | 176.7 | 128.0 | 82.3  |
| B.6 Diabetes mellitus                     | -     | -     | 563.8 | 778.0   | 1,008.5 | 1,158.2 | 1,118.8 | 956.5   | 734.3 | 495.1 | 286.2 |
| <b>UAE</b>                                |       |       |       |         |         |         |         |         |       |       |       |
| <i>All causes</i>                         | 1.4   | 0.7   | 124.1 | 385.1   | 478.6   | 374.2   | 337.0   | 251.9   | 187.6 | 126.0 | 54.3  |
| <i>A. Communicable diseases</i>           | 1.4   | 0.7   | 1.0   | 2.0     | 1.5     | 0.8     | 0.6     | 0.3     | 0.2   | 0.1   | 0.1   |
| A.1 Respiratory infections & tuberculosis | 1.4   | 0.7   | 1.0   | 2.0     | 1.5     | 0.8     | 0.6     | 0.3     | 0.2   | 0.1   | 0.1   |
| Lower respiratory infections              | 1.4   | 0.7   | 1.0   | 2.0     | 1.5     | 0.8     | 0.6     | 0.3     | 0.2   | 0.1   | 0.1   |
| <i>B. Non-communicable diseases</i>       | -     | -     | 123.1 | 383.1   | 477.1   | 373.4   | 336.4   | 251.6   | 187.4 | 125.9 | 54.2  |
| B.1 Neoplasms                             | -     | -     | 0.3   | 1.7     | 2.8     | 3.2     | 4.0     | 3.4     | 2.8   | 1.7   | 0.5   |
| Tracheal, bronchus, and lung cancer       | -     | -     | 0.0   | 0.0     | 0.1     | 0.1     | 0.1     | 0.1     | 0.2   | 0.1   | 0.0   |
| Breast cancer                             | -     | -     | 0.2   | 1.7     | 2.7     | 3.1     | 3.9     | 3.2     | 2.6   | 1.5   | 0.4   |
| B.2 Cardiovascular diseases               | -     | -     | 7.2   | 19.5    | 24.3    | 19.6    | 19.2    | 15.4    | 12.6  | 9.0   | 4.1   |
| Ischemic heart disease                    | -     | -     | 0.3   | 1.0     | 1.5     | 1.4     | 1.5     | 1.1     | 0.8   | 0.6   | 0.3   |
| Stroke                                    | -     | -     | 7.0   | 18.5    | 22.8    | 18.2    | 17.7    | 14.3    | 11.7  | 8.4   | 3.8   |
| B.3 Chronic respiratory diseases          | -     | -     | 45.8  | 128.9   | 138.9   | 93.8    | 73.7    | 50.3    | 36.1  | 24.4  | 11.2  |
| Chronic obstructive pulmonary disease     | -     | -     | 45.8  | 128.9   | 138.9   | 93.8    | 73.7    | 50.3    | 36.1  | 24.4  | 11.2  |
| B.6 Diabetes mellitus                     | -     | -     | 69.8  | 233.0   | 311.1   | 256.8   | 239.5   | 182.5   | 136.0 | 90.9  | 38.5  |

Source: GBD Study, IHME

**Table S8: Number of deaths related to SHS exposure, by age and disease, men**

|                                           | 15-19 | 20-24 | 25-29 | 30-34 | 35-39 | 40-44 | 45-49 | 50-54 | 55-59 | 60-64 | 65-69 |
|-------------------------------------------|-------|-------|-------|-------|-------|-------|-------|-------|-------|-------|-------|
| <b><u>Bahrain</u></b>                     |       |       |       |       |       |       |       |       |       |       |       |
| <i>All causes</i>                         | 0.0   | 0.0   | 0.4   | 0.9   | 1.5   | 2.7   | 4.2   | 5.9   | 8.7   | 11.1  | 7.4   |
| <i>A. Communicable diseases</i>           | 0.0   | 0.0   | 0.0   | 0.1   | 0.1   | 0.2   | 0.2   | 0.2   | 0.4   | 0.5   | 0.4   |
| A.1 Respiratory infections & tuberculosis | 0.0   | 0.0   | 0.0   | 0.1   | 0.1   | 0.2   | 0.2   | 0.2   | 0.4   | 0.5   | 0.4   |
| Lower respiratory infections              | 0.0   | 0.0   | 0.0   | 0.1   | 0.1   | 0.2   | 0.2   | 0.2   | 0.4   | 0.5   | 0.4   |
| <i>B. Non-communicable diseases</i>       | -     | -     | 0.3   | 0.8   | 1.4   | 2.5   | 4.0   | 5.7   | 8.3   | 10.5  | 7.0   |
| B.1 Neoplasms                             | -     | -     | 0.0   | 0.0   | 0.0   | 0.1   | 0.2   | 0.3   | 0.5   | 0.8   | 0.5   |
| Tracheal, bronchus, and lung cancer       | -     | -     | 0.0   | 0.0   | 0.0   | 0.1   | 0.2   | 0.3   | 0.5   | 0.8   | 0.5   |
| Breast cancer                             | -     | -     | 0.0   | 0.0   | 0.0   | 0.0   | 0.0   | 0.0   | 0.0   | 0.0   | 0.0   |
| B.2 Cardiovascular diseases               | -     | -     | 0.3   | 0.7   | 1.2   | 2.0   | 2.8   | 3.5   | 4.6   | 4.6   | 2.6   |
| Ischemic heart disease                    | -     | -     | 0.2   | 0.6   | 1.0   | 1.7   | 2.5   | 3.2   | 4.2   | 4.2   | 2.3   |
| Stroke                                    | -     | -     | 0.1   | 0.1   | 0.2   | 0.3   | 0.3   | 0.3   | 0.4   | 0.4   | 0.3   |
| B.3 Chronic respiratory diseases          | -     | -     | 0.0   | 0.0   | 0.0   | 0.0   | 0.1   | 0.1   | 0.2   | 0.5   | 0.5   |
| Chronic obstructive pulmonary disease     | -     | -     | 0.0   | 0.0   | 0.0   | 0.0   | 0.1   | 0.1   | 0.2   | 0.5   | 0.5   |
| B.6 Diabetes mellitus                     | -     | -     | 0.0   | 0.1   | 0.1   | 0.4   | 1.0   | 1.8   | 3.0   | 4.7   | 3.4   |
| <b><u>Kuwait</u></b>                      |       |       |       |       |       |       |       |       |       |       |       |
| <i>All causes</i>                         | 0.3   | 0.3   | 2.8   | 5.4   | 6.4   | 8.5   | 12.3  | 16.0  | 16.9  | 15.6  | 11.3  |
| <i>A. Communicable diseases</i>           | 0.3   | 0.3   | 0.4   | 0.5   | 0.5   | 0.5   | 0.6   | 1.1   | 1.4   | 1.6   | 1.7   |
| A.1 Respiratory infections & tuberculosis | 0.3   | 0.3   | 0.4   | 0.5   | 0.5   | 0.5   | 0.6   | 1.1   | 1.4   | 1.6   | 1.7   |
| Lower respiratory infections              | 0.3   | 0.3   | 0.4   | 0.5   | 0.5   | 0.5   | 0.6   | 1.1   | 1.4   | 1.6   | 1.7   |
| <i>B. Non-communicable diseases</i>       | -     | -     | 2.4   | 4.9   | 5.9   | 8.0   | 11.8  | 14.9  | 15.5  | 14.0  | 9.7   |
| B.1 Neoplasms                             | -     | -     | 0.0   | 0.1   | 0.1   | 0.2   | 0.3   | 0.5   | 0.8   | 1.0   | 0.9   |
| Tracheal, bronchus, and lung cancer       | -     | -     | 0.0   | 0.1   | 0.1   | 0.2   | 0.3   | 0.5   | 0.8   | 1.0   | 0.9   |
| Breast cancer                             | -     | -     | 0.0   | 0.0   | 0.0   | 0.0   | 0.0   | 0.0   | 0.0   | 0.0   | 0.0   |
| B.2 Cardiovascular diseases               | -     | -     | 2.4   | 4.7   | 5.7   | 7.7   | 11.0  | 13.6  | 13.7  | 11.6  | 7.2   |
| Ischemic heart disease                    | -     | -     | 2.1   | 4.3   | 5.2   | 6.9   | 10.0  | 12.4  | 12.5  | 10.3  | 6.1   |
| Stroke                                    | -     | -     | 0.3   | 0.4   | 0.5   | 0.8   | 1.0   | 1.2   | 1.2   | 1.3   | 1.1   |
| B.3 Chronic respiratory diseases          | -     | -     | 0.1   | 0.1   | 0.0   | 0.1   | 0.1   | 0.2   | 0.3   | 0.5   | 0.5   |
| Chronic obstructive pulmonary disease     | -     | -     | 0.1   | 0.1   | 0.0   | 0.1   | 0.1   | 0.2   | 0.3   | 0.5   | 0.5   |
| B.6 Diabetes mellitus                     | -     | -     | 0.0   | 0.1   | 0.1   | 0.1   | 0.3   | 0.6   | 0.7   | 1.0   | 1.0   |



**Table S8: Number of deaths related to SHS exposure, by age and disease, men (continued)**

|                                           | 15-19 | 20-24 | 25-29 | 30-34 | 35-39 | 40-44 | 45-49 | 50-54 | 55-59 | 60-64 | 65-69 |
|-------------------------------------------|-------|-------|-------|-------|-------|-------|-------|-------|-------|-------|-------|
| <b>Oman</b>                               |       |       |       |       |       |       |       |       |       |       |       |
| <i>All causes</i>                         | 0.2   | 0.5   | 5.1   | 5.5   | 5.1   | 6.7   | 10.6  | 15.2  | 22.8  | 21.0  | 18.1  |
| <i>A. Communicable diseases</i>           | 0.2   | 0.5   | 0.7   | 0.7   | 0.5   | 0.5   | 0.7   | 0.8   | 1.4   | 1.8   | 2.0   |
| A.1 Respiratory infections & tuberculosis | 0.2   | 0.5   | 0.7   | 0.7   | 0.5   | 0.5   | 0.7   | 0.8   | 1.4   | 1.8   | 2.0   |
| Lower respiratory infections              | 0.2   | 0.5   | 0.7   | 0.7   | 0.5   | 0.5   | 0.7   | 0.8   | 1.4   | 1.8   | 2.0   |
| <i>B. Non-communicable diseases</i>       | -     | -     | 4.4   | 4.8   | 4.6   | 6.2   | 10.0  | 14.4  | 21.3  | 19.2  | 16.1  |
| B.1 Neoplasms                             | -     | -     | 0.0   | 0.1   | 0.1   | 0.1   | 0.3   | 0.4   | 0.7   | 0.8   | 0.7   |
| Tracheal, bronchus, and lung cancer       | -     | -     | 0.0   | 0.1   | 0.1   | 0.1   | 0.2   | 0.4   | 0.7   | 0.8   | 0.6   |
| Breast cancer                             | -     | -     | 0.0   | 0.0   | 0.0   | 0.0   | 0.0   | 0.0   | 0.0   | 0.0   | 0.0   |
| B.2 Cardiovascular diseases               | -     | -     | 4.3   | 4.6   | 4.3   | 5.8   | 8.9   | 12.4  | 17.9  | 15.2  | 12.3  |
| Ischemic heart disease                    | -     | -     | 3.3   | 3.9   | 3.8   | 5.1   | 8.0   | 11.3  | 15.8  | 13.2  | 10.7  |
| Stroke                                    | -     | -     | 1.0   | 0.6   | 0.6   | 0.6   | 0.9   | 1.1   | 2.1   | 2.0   | 1.6   |
| B.3 Chronic respiratory diseases          | -     | -     | 0.0   | 0.0   | 0.0   | 0.0   | 0.0   | 0.1   | 0.3   | 0.5   | 0.7   |
| Chronic obstructive pulmonary disease     | -     | -     | 0.0   | 0.0   | 0.0   | 0.0   | 0.0   | 0.1   | 0.3   | 0.5   | 0.7   |
| B.6 Diabetes mellitus                     | -     | -     | 0.1   | 0.2   | 0.2   | 0.3   | 0.8   | 1.4   | 2.4   | 2.7   | 2.4   |
| <b>Qatar</b>                              |       |       |       |       |       |       |       |       |       |       |       |
| <i>All causes</i>                         | 0.1   | 0.1   | 1.3   | 1.3   | 1.5   | 1.9   | 4.0   | 5.6   | 8.2   | 7.9   | 5.6   |
| <i>A. Communicable diseases</i>           | 0.1   | 0.1   | 0.3   | 0.2   | 0.2   | 0.1   | 0.2   | 0.2   | 0.3   | 0.4   | 0.3   |
| A.1 Respiratory infections & tuberculosis | 0.1   | 0.1   | 0.3   | 0.2   | 0.2   | 0.1   | 0.2   | 0.2   | 0.3   | 0.4   | 0.3   |
| Lower respiratory infections              | 0.1   | 0.1   | 0.3   | 0.2   | 0.2   | 0.1   | 0.2   | 0.2   | 0.3   | 0.4   | 0.3   |
| <i>B. Non-communicable diseases</i>       | -     | -     | 1.0   | 1.1   | 1.3   | 1.8   | 3.8   | 5.4   | 7.9   | 7.5   | 5.3   |
| B.1 Neoplasms                             | -     | -     | 0.0   | 0.0   | 0.0   | 0.1   | 0.2   | 0.3   | 0.5   | 0.6   | 0.4   |
| Tracheal, bronchus, and lung cancer       | -     | -     | 0.0   | 0.0   | 0.0   | 0.1   | 0.2   | 0.3   | 0.5   | 0.6   | 0.4   |
| Breast cancer                             | -     | -     | 0.0   | 0.0   | 0.0   | 0.0   | 0.0   | 0.0   | 0.0   | 0.0   | 0.0   |
| B.2 Cardiovascular diseases               | -     | -     | 0.9   | 1.0   | 1.2   | 1.5   | 3.0   | 3.8   | 5.1   | 4.1   | 2.5   |
| Ischemic heart disease                    | -     | -     | 0.6   | 0.7   | 0.9   | 1.2   | 2.6   | 3.4   | 4.5   | 3.7   | 2.3   |
| Stroke                                    | -     | -     | 0.3   | 0.2   | 0.3   | 0.3   | 0.5   | 0.5   | 0.6   | 0.4   | 0.3   |
| B.3 Chronic respiratory diseases          | -     | -     | 0.0   | 0.1   | 0.0   | 0.0   | 0.1   | 0.1   | 0.2   | 0.3   | 0.3   |
| Chronic obstructive pulmonary disease     | -     | -     | 0.0   | 0.1   | 0.0   | 0.0   | 0.1   | 0.1   | 0.2   | 0.3   | 0.3   |
| B.6 Diabetes mellitus                     | -     | -     | 0.0   | 0.0   | 0.1   | 0.1   | 0.5   | 1.2   | 2.1   | 2.5   | 2.1   |

**Table S8: Number of deaths related to SHS exposure, by age and disease, men (continued)**

|                                           | 15-19 | 20-24 | 25-29 | 30-34 | 35-39 | 40-44 | 45-49 | 50-54 | 55-59 | 60-64 | 65-69 |
|-------------------------------------------|-------|-------|-------|-------|-------|-------|-------|-------|-------|-------|-------|
| <b>Saudi Arabia</b>                       |       |       |       |       |       |       |       |       |       |       |       |
| <i>All causes</i>                         | 1.5   | 1.7   | 11.3  | 16.5  | 27.0  | 44.7  | 70.1  | 94.9  | 112.0 | 123.3 | 107.5 |
| <i>A. Communicable diseases</i>           | 1.5   | 1.7   | 1.8   | 2.0   | 2.5   | 3.0   | 3.6   | 5.0   | 6.4   | 8.3   | 8.1   |
| A.1 Respiratory infections & tuberculosis | 1.5   | 1.7   | 1.8   | 2.0   | 2.5   | 3.0   | 3.6   | 5.0   | 6.4   | 8.3   | 8.1   |
| Lower respiratory infections              | 1.5   | 1.7   | 1.8   | 2.0   | 2.5   | 3.0   | 3.6   | 5.0   | 6.4   | 8.3   | 8.1   |
| <i>B. Non-communicable diseases</i>       | -     | -     | 9.6   | 14.5  | 24.5  | 41.7  | 66.5  | 89.9  | 105.6 | 115.0 | 99.3  |
| B.1 Neoplasms                             | -     | -     | 0.1   | 0.2   | 0.4   | 0.7   | 1.4   | 2.1   | 3.1   | 4.2   | 4.4   |
| Tracheal, bronchus, and lung cancer       | -     | -     | 0.1   | 0.2   | 0.4   | 0.7   | 1.4   | 2.1   | 3.0   | 4.2   | 4.4   |
| Breast cancer                             | -     | -     | 0.0   | 0.0   | 0.0   | 0.0   | 0.0   | 0.0   | 0.0   | 0.0   | 0.0   |
| B.2 Cardiovascular diseases               | -     | -     | 9.0   | 13.6  | 22.6  | 38.2  | 59.0  | 77.4  | 86.7  | 90.0  | 74.3  |
| Ischemic heart disease                    | -     | -     | 6.5   | 10.8  | 18.7  | 32.5  | 51.2  | 67.1  | 74.7  | 76.1  | 61.5  |
| Stroke                                    | -     | -     | 2.6   | 2.8   | 3.9   | 5.7   | 7.8   | 10.3  | 12.1  | 13.9  | 12.8  |
| B.3 Chronic respiratory diseases          | -     | -     | 0.3   | 0.3   | 0.6   | 0.8   | 1.4   | 2.7   | 3.9   | 6.2   | 6.9   |
| Chronic obstructive pulmonary disease     | -     | -     | 0.3   | 0.3   | 0.6   | 0.8   | 1.4   | 2.7   | 3.9   | 6.2   | 6.9   |
| B.6 Diabetes mellitus                     | -     | -     | 0.2   | 0.5   | 0.9   | 2.0   | 4.8   | 7.7   | 11.9  | 14.6  | 13.7  |
| <b>UAE</b>                                |       |       |       |       |       |       |       |       |       |       |       |
| <i>All causes</i>                         | 0.4   | 0.2   | 5.0   | 11.5  | 20.7  | 34.0  | 48.6  | 56.8  | 49.4  | 71.0  | 25.2  |
| <i>A. Communicable diseases</i>           | 0.4   | 0.2   | 0.5   | 0.9   | 1.1   | 1.2   | 1.4   | 1.5   | 1.9   | 4.2   | 2.3   |
| A.1 Respiratory infections & tuberculosis | 0.4   | 0.2   | 0.5   | 0.9   | 1.1   | 1.2   | 1.4   | 1.5   | 1.9   | 4.2   | 2.3   |
| Lower respiratory infections              | 0.4   | 0.2   | 0.5   | 0.9   | 1.1   | 1.2   | 1.4   | 1.5   | 1.9   | 4.2   | 2.3   |
| <i>B. Non-communicable diseases</i>       | -     | -     | 4.5   | 10.6  | 19.7  | 32.8  | 47.2  | 55.3  | 47.5  | 66.7  | 22.9  |
| B.1 Neoplasms                             | -     | -     | 0.0   | 0.2   | 0.4   | 0.7   | 1.0   | 1.4   | 2.0   | 3.5   | 1.1   |
| Tracheal, bronchus, and lung cancer       | -     | -     | 0.0   | 0.2   | 0.4   | 0.6   | 1.0   | 1.4   | 2.0   | 3.5   | 1.1   |
| Breast cancer                             | -     | -     | 0.0   | 0.0   | 0.0   | 0.0   | 0.0   | 0.0   | 0.0   | 0.0   | 0.0   |
| B.2 Cardiovascular diseases               | -     | -     | 3.0   | 7.2   | 14.4  | 25.4  | 34.4  | 38.0  | 30.5  | 40.0  | 13.5  |
| Ischemic heart disease                    | -     | -     | 2.2   | 5.5   | 10.5  | 20.3  | 27.9  | 30.9  | 24.6  | 31.3  | 10.6  |
| Stroke                                    | -     | -     | 0.8   | 1.7   | 3.9   | 5.0   | 6.6   | 7.0   | 6.0   | 8.7   | 3.0   |
| B.3 Chronic respiratory diseases          | -     | -     | 1.4   | 3.0   | 4.3   | 5.4   | 7.1   | 8.2   | 5.7   | 8.2   | 2.8   |
| Chronic obstructive pulmonary disease     | -     | -     | 1.4   | 3.0   | 4.3   | 5.4   | 7.1   | 8.2   | 5.7   | 8.2   | 2.8   |
| B.6 Diabetes mellitus                     | -     | -     | 0.1   | 0.2   | 0.5   | 1.3   | 4.6   | 7.7   | 9.3   | 15.0  | 5.5   |

Source: GBD Study, IHME

**Table S9: Number of deaths related to SHS exposure, by age and disease, women**

|                                           | 15-19 | 20-24 | 25-29 | 30-34 | 35-39 | 40-44 | 45-49 | 50-54 | 55-59 | 60-64 | 65-69 |
|-------------------------------------------|-------|-------|-------|-------|-------|-------|-------|-------|-------|-------|-------|
| <b><u>Bahrain</u></b>                     |       |       |       |       |       |       |       |       |       |       |       |
| <i>All causes</i>                         | 0.0   | 0.0   | 0.1   | 0.3   | 0.4   | 0.6   | 1.3   | 3.1   | 4.6   | 5.1   | 4.5   |
| <i>A. Communicable diseases</i>           | 0.0   | 0.0   | 0.0   | 0.0   | 0.0   | 0.0   | 0.1   | 0.2   | 0.2   | 0.3   | 0.2   |
| A.1 Respiratory infections & tuberculosis | 0.0   | 0.0   | 0.0   | 0.0   | 0.0   | 0.0   | 0.1   | 0.2   | 0.2   | 0.3   | 0.2   |
| Lower respiratory infections              | 0.0   | 0.0   | 0.0   | 0.0   | 0.0   | 0.0   | 0.1   | 0.2   | 0.2   | 0.3   | 0.2   |
| <i>B. Non-communicable diseases</i>       | -     | -     | 0.1   | 0.2   | 0.4   | 0.6   | 1.2   | 3.0   | 4.4   | 4.8   | 4.2   |
| B.1 Neoplasms                             | -     | -     | 0.0   | 0.0   | 0.1   | 0.2   | 0.3   | 0.4   | 0.4   | 0.3   | 0.2   |
| Tracheal, bronchus, and lung cancer       | -     | -     | 0.0   | 0.0   | 0.0   | 0.0   | 0.1   | 0.1   | 0.2   | 0.2   | 0.1   |
| Breast cancer                             | -     | -     | 0.0   | 0.0   | 0.1   | 0.1   | 0.2   | 0.3   | 0.2   | 0.1   | 0.1   |
| B.2 Cardiovascular diseases               | -     | -     | 0.1   | 0.1   | 0.2   | 0.3   | 0.6   | 1.3   | 1.7   | 1.7   | 1.5   |
| Ischemic heart disease                    | -     | -     | 0.0   | 0.1   | 0.1   | 0.2   | 0.4   | 1.1   | 1.4   | 1.4   | 1.3   |
| Stroke                                    | -     | -     | 0.0   | 0.0   | 0.1   | 0.1   | 0.1   | 0.2   | 0.3   | 0.3   | 0.2   |
| B.3 Chronic respiratory diseases          | -     | -     | 0.0   | 0.0   | 0.0   | 0.0   | 0.0   | 0.1   | 0.2   | 0.2   | 0.2   |
| Chronic obstructive pulmonary disease     | -     | -     | 0.0   | 0.0   | 0.0   | 0.0   | 0.0   | 0.1   | 0.2   | 0.2   | 0.2   |
| B.6 Diabetes mellitus                     | -     | -     | 0.0   | 0.0   | 0.1   | 0.1   | 0.4   | 1.2   | 2.2   | 2.7   | 2.3   |
| <b><u>Kuwait</u></b>                      |       |       |       |       |       |       |       |       |       |       |       |
| <i>All causes</i>                         | 0.2   | 0.3   | 1.4   | 2.9   | 3.3   | 4.4   | 6.0   | 7.0   | 6.0   | 5.9   | 5.4   |
| <i>A. Communicable diseases</i>           | 0.2   | 0.3   | 0.5   | 0.7   | 0.6   | 0.7   | 0.7   | 1.1   | 1.2   | 1.2   | 1.5   |
| A.1 Respiratory infections & tuberculosis | 0.2   | 0.3   | 0.5   | 0.7   | 0.6   | 0.7   | 0.7   | 1.1   | 1.2   | 1.2   | 1.5   |
| Lower respiratory infections              | 0.2   | 0.3   | 0.5   | 0.7   | 0.6   | 0.7   | 0.7   | 1.1   | 1.2   | 1.2   | 1.5   |
| <i>B. Non-communicable diseases</i>       | -     | -     | 0.9   | 2.2   | 2.6   | 3.7   | 5.3   | 5.9   | 4.8   | 4.7   | 3.9   |
| B.1 Neoplasms                             | -     | -     | 0.1   | 0.3   | 0.5   | 0.8   | 1.2   | 1.1   | 0.9   | 0.6   | 0.5   |
| Tracheal, bronchus, and lung cancer       | -     | -     | 0.0   | 0.1   | 0.1   | 0.2   | 0.4   | 0.5   | 0.3   | 0.3   | 0.3   |
| Breast cancer                             | -     | -     | 0.0   | 0.2   | 0.3   | 0.6   | 0.8   | 0.7   | 0.5   | 0.3   | 0.2   |
| B.2 Cardiovascular diseases               | -     | -     | 0.7   | 1.6   | 1.9   | 2.5   | 3.5   | 3.9   | 3.0   | 3.0   | 2.5   |
| Ischemic heart disease                    | -     | -     | 0.4   | 1.1   | 1.2   | 1.6   | 2.6   | 3.1   | 2.4   | 2.5   | 1.9   |
| Stroke                                    | -     | -     | 0.3   | 0.5   | 0.7   | 0.8   | 0.9   | 0.8   | 0.5   | 0.6   | 0.5   |
| B.3 Chronic respiratory diseases          | -     | -     | 0.0   | 0.1   | 0.1   | 0.1   | 0.2   | 0.2   | 0.2   | 0.2   | 0.2   |
| Chronic obstructive pulmonary disease     | -     | -     | 0.0   | 0.1   | 0.1   | 0.1   | 0.2   | 0.2   | 0.2   | 0.2   | 0.2   |
| B.6 Diabetes mellitus                     | -     | -     | 0.1   | 0.1   | 0.2   | 0.3   | 0.4   | 0.6   | 0.8   | 0.8   | 0.8   |

**Table S9: Number of deaths related to SHS exposure, by age and disease, women (continued)**

|                                           | 15-19 | 20-24 | 25-29 | 30-34 | 35-39 | 40-44 | 45-49 | 50-54 | 55-59 | 60-64 | 65-69 |
|-------------------------------------------|-------|-------|-------|-------|-------|-------|-------|-------|-------|-------|-------|
| <b>Oman</b>                               |       |       |       |       |       |       |       |       |       |       |       |
| <i>All causes</i>                         | 0.2   | 0.2   | 1.8   | 2.1   | 2.6   | 3.2   | 4.5   | 6.6   | 10.1  | 10.9  | 11.0  |
| <i>A. Communicable diseases</i>           | 0.2   | 0.2   | 0.4   | 0.4   | 0.3   | 0.2   | 0.3   | 0.4   | 0.8   | 1.0   | 1.2   |
| A.1 Respiratory infections & tuberculosis | 0.2   | 0.2   | 0.4   | 0.4   | 0.3   | 0.2   | 0.3   | 0.4   | 0.8   | 1.0   | 1.2   |
| Lower respiratory infections              | 0.2   | 0.2   | 0.4   | 0.4   | 0.3   | 0.2   | 0.3   | 0.4   | 0.8   | 1.0   | 1.2   |
| <i>B. Non-communicable diseases</i>       | -     | -     | 1.4   | 1.7   | 2.3   | 3.0   | 4.2   | 6.2   | 9.3   | 9.9   | 9.8   |
| B.1 Neoplasms                             | -     | -     | 0.0   | 0.1   | 0.2   | 0.4   | 0.5   | 0.5   | 0.5   | 0.4   | 0.3   |
| Tracheal, bronchus, and lung cancer       | -     | -     | 0.0   | 0.0   | 0.1   | 0.1   | 0.2   | 0.2   | 0.2   | 0.2   | 0.2   |
| Breast cancer                             | -     | -     | 0.0   | 0.1   | 0.2   | 0.2   | 0.3   | 0.3   | 0.2   | 0.2   | 0.1   |
| B.2 Cardiovascular diseases               | -     | -     | 1.3   | 1.4   | 1.8   | 2.2   | 3.0   | 4.3   | 6.4   | 6.8   | 6.7   |
| Ischemic heart disease                    | -     | -     | 0.8   | 1.0   | 1.3   | 1.6   | 2.4   | 3.5   | 5.4   | 5.8   | 5.6   |
| Stroke                                    | -     | -     | 0.5   | 0.4   | 0.5   | 0.6   | 0.6   | 0.8   | 1.1   | 1.0   | 1.1   |
| B.3 Chronic respiratory diseases          | -     | -     | 0.0   | 0.0   | 0.0   | 0.0   | 0.0   | 0.0   | 0.1   | 0.2   | 0.2   |
| Chronic obstructive pulmonary disease     | -     | -     | 0.0   | 0.0   | 0.0   | 0.0   | 0.0   | 0.0   | 0.1   | 0.2   | 0.2   |
| B.6 Diabetes mellitus                     | -     | -     | 0.1   | 0.2   | 0.3   | 0.4   | 0.8   | 1.4   | 2.3   | 2.6   | 2.6   |
| <b>Qatar</b>                              |       |       |       |       |       |       |       |       |       |       |       |
| <i>All causes</i>                         | 0.0   | 0.0   | 0.2   | 0.4   | 0.6   | 0.9   | 1.2   | 2.1   | 2.7   | 2.8   | 2.1   |
| <i>A. Communicable diseases</i>           | 0.0   | 0.0   | 0.1   | 0.1   | 0.1   | 0.0   | 0.1   | 0.1   | 0.1   | 0.1   | 0.1   |
| A.1 Respiratory infections & tuberculosis | 0.0   | 0.0   | 0.1   | 0.1   | 0.1   | 0.0   | 0.1   | 0.1   | 0.1   | 0.1   | 0.1   |
| Lower respiratory infections              | 0.0   | 0.0   | 0.1   | 0.1   | 0.1   | 0.0   | 0.1   | 0.1   | 0.1   | 0.1   | 0.1   |
| <i>B. Non-communicable diseases</i>       | -     | -     | 0.1   | 0.4   | 0.6   | 0.8   | 1.1   | 2.0   | 2.6   | 2.6   | 1.9   |
| B.1 Neoplasms                             | -     | -     | 0.0   | 0.1   | 0.2   | 0.3   | 0.3   | 0.5   | 0.5   | 0.3   | 0.2   |
| Tracheal, bronchus, and lung cancer       | -     | -     | 0.0   | 0.0   | 0.0   | 0.0   | 0.1   | 0.1   | 0.1   | 0.1   | 0.1   |
| Breast cancer                             | -     | -     | 0.0   | 0.1   | 0.2   | 0.2   | 0.2   | 0.3   | 0.3   | 0.2   | 0.1   |
| B.2 Cardiovascular diseases               | -     | -     | 0.1   | 0.2   | 0.3   | 0.4   | 0.5   | 0.8   | 1.1   | 1.1   | 0.8   |
| Ischemic heart disease                    | -     | -     | 0.0   | 0.1   | 0.1   | 0.2   | 0.4   | 0.6   | 0.9   | 0.9   | 0.7   |
| Stroke                                    | -     | -     | 0.0   | 0.1   | 0.2   | 0.2   | 0.2   | 0.2   | 0.2   | 0.1   | 0.1   |
| B.3 Chronic respiratory diseases          | -     | -     | 0.0   | 0.0   | 0.0   | 0.0   | 0.0   | 0.1   | 0.1   | 0.1   | 0.1   |
| Chronic obstructive pulmonary disease     | -     | -     | 0.0   | 0.0   | 0.0   | 0.0   | 0.0   | 0.1   | 0.1   | 0.1   | 0.1   |
| B.6 Diabetes mellitus                     | -     | -     | 0.0   | 0.0   | 0.1   | 0.2   | 0.2   | 0.6   | 1.0   | 1.2   | 0.9   |

**Table S9: Number of deaths related to SHS exposure, by age and disease, women (continued)**

|                                           | 15-19 | 20-24 | 25-29 | 30-34 | 35-39 | 40-44 | 45-49 | 50-54 | 55-59 | 60-64 | 65-69 |
|-------------------------------------------|-------|-------|-------|-------|-------|-------|-------|-------|-------|-------|-------|
| <b>Saudi Arabia</b>                       |       |       |       |       |       |       |       |       |       |       |       |
| <i>All causes</i>                         | 1.5   | 1.8   | 11.0  | 18.6  | 29.4  | 48.7  | 65.7  | 79.0  | 87.3  | 82.8  | 65.7  |
| <i>A. Communicable diseases</i>           | 1.5   | 1.8   | 2.2   | 2.8   | 3.8   | 4.8   | 5.7   | 7.3   | 6.9   | 7.0   | 6.1   |
| A.1 Respiratory infections & tuberculosis | 1.5   | 1.8   | 2.2   | 2.8   | 3.8   | 4.8   | 5.7   | 7.3   | 6.9   | 7.0   | 6.1   |
| Lower respiratory infections              | 1.5   | 1.8   | 2.2   | 2.8   | 3.8   | 4.8   | 5.7   | 7.3   | 6.9   | 7.0   | 6.1   |
| <i>B. Non-communicable diseases</i>       | -     | -     | 8.8   | 15.7  | 25.6  | 43.8  | 60.0  | 71.7  | 80.4  | 75.8  | 59.6  |
| B.1 Neoplasms                             | -     | -     | 0.4   | 1.6   | 3.6   | 5.3   | 6.3   | 5.7   | 4.4   | 2.9   | 1.7   |
| Tracheal, bronchus, and lung cancer       | -     | -     | 0.1   | 0.3   | 0.6   | 0.9   | 1.2   | 1.3   | 1.2   | 1.0   | 0.7   |
| Breast cancer                             | -     | -     | 0.3   | 1.3   | 3.0   | 4.4   | 5.1   | 4.3   | 3.2   | 1.9   | 1.0   |
| B.2 Cardiovascular diseases               | -     | -     | 7.3   | 11.9  | 18.5  | 32.4  | 44.2  | 53.2  | 59.5  | 57.0  | 44.8  |
| Ischemic heart disease                    | -     | -     | 4.9   | 8.4   | 13.1  | 23.9  | 35.4  | 43.2  | 48.7  | 46.3  | 35.9  |
| Stroke                                    | -     | -     | 2.4   | 3.5   | 5.3   | 8.5   | 8.8   | 9.9   | 10.8  | 10.7  | 9.0   |
| B.3 Chronic respiratory diseases          | -     | -     | 0.4   | 0.8   | 1.1   | 1.4   | 2.0   | 3.1   | 4.2   | 4.5   | 4.1   |
| Chronic obstructive pulmonary disease     | -     | -     | 0.4   | 0.8   | 1.1   | 1.4   | 2.0   | 3.1   | 4.2   | 4.5   | 4.1   |
| B.6 Diabetes mellitus                     | -     | -     | 0.7   | 1.5   | 2.4   | 4.7   | 7.5   | 9.8   | 12.3  | 11.4  | 9.0   |
| <b>UAE</b>                                |       |       |       |       |       |       |       |       |       |       |       |
| <i>All causes</i>                         | 0.1   | 0.1   | 1.4   | 4.4   | 5.4   | 5.6   | 8.2   | 10.6  | 13.2  | 17.6  | 10.6  |
| <i>A. Communicable diseases</i>           | 0.1   | 0.1   | 0.2   | 0.5   | 0.3   | 0.3   | 0.3   | 0.3   | 0.4   | 0.8   | 0.8   |
| A.1 Respiratory infections & tuberculosis | 0.1   | 0.1   | 0.2   | 0.5   | 0.3   | 0.3   | 0.3   | 0.3   | 0.4   | 0.8   | 0.8   |
| Lower respiratory infections              | 0.1   | 0.1   | 0.2   | 0.5   | 0.3   | 0.3   | 0.3   | 0.3   | 0.4   | 0.8   | 0.8   |
| <i>B. Non-communicable diseases</i>       | -     | -     | 1.2   | 3.9   | 5.0   | 5.3   | 7.9   | 10.3  | 12.8  | 16.8  | 9.9   |
| B.1 Neoplasms                             | -     | -     | 0.1   | 0.5   | 0.9   | 1.2   | 1.7   | 2.0   | 2.0   | 1.3   | 0.4   |
| Tracheal, bronchus, and lung cancer       | -     | -     | 0.0   | 0.1   | 0.2   | 0.2   | 0.3   | 0.5   | 0.6   | 0.5   | 0.2   |
| Breast cancer                             | -     | -     | 0.0   | 0.4   | 0.8   | 1.0   | 1.4   | 1.5   | 1.4   | 0.8   | 0.2   |
| B.2 Cardiovascular diseases               | -     | -     | 1.0   | 2.8   | 3.2   | 3.1   | 4.8   | 5.7   | 6.5   | 8.8   | 5.4   |
| Ischemic heart disease                    | -     | -     | 0.6   | 1.2   | 0.9   | 1.1   | 2.0   | 3.5   | 4.4   | 6.4   | 4.1   |
| Stroke                                    | -     | -     | 0.4   | 1.6   | 2.3   | 2.0   | 2.8   | 2.1   | 2.1   | 2.5   | 1.4   |
| B.3 Chronic respiratory diseases          | -     | -     | 0.1   | 0.4   | 0.5   | 0.6   | 0.6   | 0.8   | 1.2   | 1.4   | 0.7   |
| Chronic obstructive pulmonary disease     | -     | -     | 0.1   | 0.4   | 0.5   | 0.6   | 0.6   | 0.8   | 1.2   | 1.4   | 0.7   |
| B.6 Diabetes mellitus                     | -     | -     | 0.0   | 0.2   | 0.4   | 0.5   | 0.9   | 1.9   | 3.2   | 5.3   | 3.3   |

Source: GBD Study, IHME

**Table S10: Direct, morbidity, mortality and total cost of smoking and secondhand smoke exposure, by country in US \$, 2016.**

|                | <b>Direct Cost<br/>US \$<br/>(Million)</b> | <b>Morbidity<br/>US \$<br/>(Million)</b> | <b>Mortality<br/>US \$<br/>(Million)</b> | <b>Total Cost<br/>US \$<br/>(Million)</b> |
|----------------|--------------------------------------------|------------------------------------------|------------------------------------------|-------------------------------------------|
| <b>SMOKING</b> |                                            |                                          |                                          |                                           |
| Bahrain        | 159                                        | 94                                       | 87                                       | 340                                       |
| Kuwait         | 527                                        | 273                                      | 500                                      | 1,300                                     |
| Oman           | 222                                        | 110                                      | 159                                      | 491                                       |
| Qatar          | 246                                        | 224                                      | 207                                      | 678                                       |
| KSA            | 2,119                                      | 986                                      | 1,899                                    | 5,003                                     |
| UAE            | 1,150                                      | 886                                      | 1,550                                    | 3,587                                     |
| All            | 4,424                                      | 2,574                                    | 4,401                                    | 11,399                                    |
| <b>SHS</b>     |                                            |                                          |                                          |                                           |
| Bahrain        | 52                                         | 41                                       | 23                                       | 116                                       |
| Kuwait         | 126                                        | 95                                       | 89                                       | 309                                       |
| Oman           | 67                                         | 41                                       | 38                                       | 146                                       |
| Qatar          | 67                                         | 105                                      | 45                                       | 217                                       |
| KSA            | 603                                        | 391                                      | 312                                      | 1,306                                     |
| UAE            | 236                                        | 321                                      | 257                                      | 814                                       |
| All            | 1,150                                      | 995                                      | 764                                      | 2,908                                     |

KSA, Kingdom of Saudi Arabia; UAE, United Arab Emirates; SHS, secondhand smoke exposure.

**Table S11: Percentage of morbidity cost distribution by cause of disease, age and gender in the GCC countries, 2016**

|                                         | Men   |       |       |       |       |       |       |       |       | Women |       |       |       |       |       |       |       |       |
|-----------------------------------------|-------|-------|-------|-------|-------|-------|-------|-------|-------|-------|-------|-------|-------|-------|-------|-------|-------|-------|
|                                         | 25-29 | 30-34 | 35-39 | 40-44 | 45-49 | 50-54 | 55-59 | 60-64 | 65-69 | 25-29 | 30-34 | 35-39 | 40-44 | 45-49 | 50-54 | 55-59 | 60-64 | 65-69 |
| <b>BAHRAIN</b>                          |       |       |       |       |       |       |       |       |       |       |       |       |       |       |       |       |       |       |
| <b>SMOKING</b>                          |       |       |       |       |       |       |       |       |       |       |       |       |       |       |       |       |       |       |
| A. Communicable diseases                | -     | 2.0   | 1.1   | 0.7   | 0.4   | 0.3   | 0.2   | 0.2   | 0.2   | -     | 1.6   | 0.9   | 0.5   | 0.4   | 0.3   | 0.2   | 0.2   | 0.2   |
| Respiratory infections and tuberculosis | -     | 2.0   | 1.1   | 0.7   | 0.4   | 0.3   | 0.2   | 0.2   | 0.2   | -     | 1.6   | 0.9   | 0.5   | 0.4   | 0.3   | 0.2   | 0.2   | 0.2   |
| B. Non-communicable diseases            | -     | 98.0  | 98.9  | 97.8  | 98.2  | 98.6  | 98.7  | 98.8  | 98.7  | -     | 98.4  | 99.1  | 97.2  | 97.6  | 97.5  | 97.6  | 97.7  | 97.3  |
| Neoplasms                               | -     | 0.3   | 0.4   | 0.4   | 0.6   | 1.1   | 1.4   | 2.6   | 3.0   | -     | 0.6   | 0.6   | 0.8   | 0.9   | 1.1   | 1.4   | 1.4   | 1.5   |
| Cardiovascular diseases                 | -     | 14.7  | 15.8  | 17.6  | 19.5  | 21.5  | 19.3  | 20.6  | 18.1  | -     | 18.6  | 20.0  | 21.4  | 24.9  | 26.8  | 23.5  | 26.4  | 23.5  |
| Chronic respiratory diseases            | -     | 36.5  | 40.6  | 39.3  | 38.3  | 38.1  | 38.5  | 38.3  | 40.3  | -     | 43.6  | 43.3  | 38.1  | 34.1  | 31.7  | 33.3  | 34.0  | 37.1  |
| Digestive diseases                      | -     | 4.4   | 3.4   | 2.4   | 1.7   | 1.2   | 0.8   | 0.6   | 0.5   | -     | 2.6   | 2.3   | 1.9   | 1.5   | 1.1   | 0.9   | 0.8   | 0.6   |
| Neurological disorders                  | -     | 0.7   | 0.5   | 0.4   | 0.5   | 0.6   | 0.9   | 1.5   | 2.9   | -     | 1.4   | 1.2   | 1.0   | 0.9   | 0.9   | 1.0   | 1.6   | 2.9   |
| Type2 diabetes mellitus                 | -     | 40.7  | 36.9  | 36.2  | 35.9  | 33.9  | 35.0  | 31.6  | 29.1  | -     | 30.8  | 30.3  | 32.6  | 33.6  | 34.0  | 35.0  | 30.2  | 26.9  |
| Sense organ diseases                    | -     | 0.9   | 1.3   | 1.4   | 1.7   | 2.2   | 2.8   | 3.6   | 4.8   | -     | 0.8   | 1.3   | 1.4   | 1.6   | 1.9   | 2.5   | 3.4   | 4.9   |
| C. Injuries                             | -     | -     | -     | 1.5   | 1.4   | 1.1   | 1.1   | 1.0   | 1.1   | -     | -     | -     | 2.2   | 2.0   | 2.2   | 2.2   | 2.1   | 2.5   |
| <b>SHS</b>                              |       |       |       |       |       |       |       |       |       |       |       |       |       |       |       |       |       |       |
| A. Communicable diseases                | 1.5   | 0.9   | 0.5   | 0.3   | 0.2   | 0.2   | 0.1   | 0.1   | 0.1   | 1.3   | 0.8   | 0.5   | 0.4   | 0.3   | 0.2   | 0.2   | 0.1   | 0.2   |
| Respiratory infections and tuberculosis | 1.5   | 0.9   | 0.5   | 0.3   | 0.2   | 0.2   | 0.1   | 0.1   | 0.1   | 1.3   | 0.8   | 0.5   | 0.4   | 0.3   | 0.2   | 0.2   | 0.1   | 0.2   |
| B. Non-communicable diseases            | 98.5  | 99.1  | 99.5  | 99.7  | 99.8  | 99.8  | 99.9  | 99.9  | 99.9  | 98.7  | 99.2  | 99.5  | 99.6  | 99.7  | 99.8  | 99.8  | 99.9  | 99.8  |
| Neoplasms                               | 0.0   | 0.0   | 0.0   | 0.0   | 0.0   | 0.1   | 0.1   | 0.2   | 0.3   | 0.2   | 0.4   | 0.6   | 0.7   | 0.8   | 0.7   | 0.7   | 0.6   | 0.7   |
| Cardiovascular diseases                 | 3.9   | 3.5   | 3.5   | 3.7   | 4.0   | 4.2   | 4.3   | 4.4   | 4.4   | 4.0   | 3.6   | 3.7   | 3.8   | 4.2   | 4.5   | 4.8   | 5.0   | 5.2   |
| Chronic respiratory diseases            | 34.9  | 32.6  | 29.6  | 26.7  | 24.1  | 22.7  | 22.4  | 23.2  | 25.3  | 50.5  | 45.9  | 39.4  | 33.3  | 27.8  | 24.3  | 22.7  | 22.6  | 24.2  |
| Type2 diabetes mellitus                 | 59.6  | 62.9  | 66.3  | 69.3  | 71.7  | 72.9  | 73.0  | 72.0  | 69.9  | 44.1  | 49.2  | 55.9  | 61.8  | 67.0  | 70.2  | 71.6  | 71.6  | 69.8  |

**Table S11: Percentage of morbidity cost distribution by cause of disease, age and gender in the GCC countries, 2016 (continued)**

|                                         | Men   |       |       |       |       |       |       |       |       | Women |       |       |       |       |       |       |       |       |
|-----------------------------------------|-------|-------|-------|-------|-------|-------|-------|-------|-------|-------|-------|-------|-------|-------|-------|-------|-------|-------|
|                                         | 25-29 | 30-34 | 35-39 | 40-44 | 45-49 | 50-54 | 55-59 | 60-64 | 65-69 | 25-29 | 30-34 | 35-39 | 40-44 | 45-49 | 50-54 | 55-59 | 60-64 | 65-69 |
| <b><u>KUWAIT</u></b>                    |       |       |       |       |       |       |       |       |       |       |       |       |       |       |       |       |       |       |
| <b>SMOKING</b>                          |       |       |       |       |       |       |       |       |       |       |       |       |       |       |       |       |       |       |
| A. Communicable diseases                | -     | 1.7   | 1.0   | 0.7   | 0.5   | 0.4   | 0.3   | 0.3   | 0.3   | -     | 1.8   | 1.0   | 0.7   | 0.5   | 0.4   | 0.3   | 0.3   | 0.3   |
| Respiratory infections and tuberculosis | -     | 1.7   | 1.0   | 0.7   | 0.5   | 0.4   | 0.3   | 0.3   | 0.3   | -     | 1.8   | 1.0   | 0.7   | 0.5   | 0.4   | 0.3   | 0.3   | 0.3   |
| B. Non-communicable diseases            | -     | 98.3  | 99.0  | 97.1  | 97.4  | 98.0  | 98.1  | 98.2  | 98.0  | -     | 98.2  | 99.0  | 97.4  | 97.5  | 97.7  | 97.2  | 97.8  | 97.8  |
| Neoplasms                               | -     | 0.3   | 0.5   | 0.5   | 0.8   | 1.3   | 1.8   | 2.7   | 3.3   | -     | 0.5   | 0.6   | 0.7   | 1.0   | 1.0   | 1.3   | 1.2   | 1.2   |
| Cardiovascular diseases                 | -     | 13.4  | 15.2  | 17.9  | 21.0  | 25.0  | 23.6  | 25.9  | 23.4  | -     | 20.0  | 22.2  | 26.5  | 30.0  | 34.7  | 29.7  | 35.5  | 32.3  |
| Chronic respiratory diseases            | -     | 35.8  | 37.6  | 36.4  | 36.0  | 37.5  | 37.7  | 37.0  | 37.6  | -     | 40.2  | 41.3  | 40.0  | 35.2  | 35.1  | 33.9  | 35.3  | 38.9  |
| Digestive diseases                      | -     | 3.7   | 3.0   | 2.3   | 1.7   | 1.3   | 0.9   | 0.6   | 0.5   | -     | 2.4   | 2.2   | 2.1   | 1.8   | 1.4   | 1.0   | 0.9   | 0.7   |
| Neurological disorders                  | -     | 0.6   | 0.5   | 0.4   | 0.5   | 0.7   | 1.1   | 2.0   | 4.0   | -     | 1.3   | 1.0   | 0.7   | 0.8   | 1.0   | 1.3   | 2.2   | 4.5   |
| Type2 diabetes mellitus                 | -     | 43.6  | 40.8  | 38.0  | 35.2  | 29.1  | 29.2  | 25.2  | 23.0  | -     | 32.9  | 30.3  | 25.6  | 26.5  | 21.8  | 26.5  | 17.7  | 12.8  |
| Sense organ diseases                    | -     | 0.8   | 1.4   | 1.8   | 2.3   | 3.1   | 3.8   | 4.9   | 6.4   | -     | 0.8   | 1.4   | 1.8   | 2.2   | 2.8   | 3.5   | 4.9   | 7.2   |
| C. Injuries                             | -     | -     | -     | 2.2   | 2.0   | 1.6   | 1.6   | 1.5   | 1.6   | -     | -     | -     | 1.9   | 2.0   | 1.9   | 2.5   | 2.0   | 2.0   |
| <b>SHS</b>                              |       |       |       |       |       |       |       |       |       |       |       |       |       |       |       |       |       |       |
| A. Communicable diseases                | 1.6   | 1.0   | 0.6   | 0.4   | 0.3   | 0.3   | 0.3   | 0.3   | 0.3   | 1.4   | 0.9   | 0.6   | 0.5   | 0.4   | 0.3   | 0.3   | 0.3   | 0.4   |
| Respiratory infections and tuberculosis | 1.6   | 1.0   | 0.6   | 0.4   | 0.3   | 0.3   | 0.3   | 0.3   | 0.3   | 1.4   | 0.9   | 0.6   | 0.5   | 0.4   | 0.3   | 0.3   | 0.3   | 0.4   |
| B. Non-communicable diseases            | 98.4  | 99.0  | 99.4  | 99.6  | 99.7  | 99.7  | 99.7  | 99.7  | 99.7  | 98.6  | 99.1  | 99.4  | 99.5  | 99.6  | 99.7  | 99.7  | 99.7  | 99.6  |
| Neoplasms                               | 0.0   | 0.0   | 0.0   | 0.0   | 0.1   | 0.1   | 0.1   | 0.2   | 0.3   | 0.2   | 0.4   | 0.5   | 0.7   | 1.0   | 0.8   | 0.9   | 0.8   | 0.8   |
| Cardiovascular diseases                 | 4.1   | 3.7   | 3.9   | 4.2   | 5.0   | 5.7   | 6.3   | 6.7   | 7.0   | 5.0   | 4.5   | 4.6   | 5.0   | 5.8   | 6.8   | 7.8   | 8.5   | 8.9   |
| Chronic respiratory diseases            | 30.8  | 29.3  | 27.5  | 26.2  | 25.5  | 25.6  | 26.1  | 27.0  | 28.0  | 45.9  | 42.1  | 37.5  | 33.2  | 29.9  | 28.1  | 27.2  | 27.0  | 27.8  |
| Type2 diabetes mellitus                 | 63.6  | 66.0  | 68.0  | 69.1  | 69.1  | 68.3  | 67.2  | 65.8  | 64.4  | 47.4  | 52.0  | 56.7  | 60.6  | 62.9  | 63.9  | 63.8  | 63.4  | 62.1  |



**Table S11: Percentage of morbidity cost distribution by cause of disease, age and gender in the GCC countries, 2016 (continued)**

|                                         | Men   |       |       |       |       |       |       |       |       | Women |       |       |       |       |       |       |       |       |
|-----------------------------------------|-------|-------|-------|-------|-------|-------|-------|-------|-------|-------|-------|-------|-------|-------|-------|-------|-------|-------|
|                                         | 25-29 | 30-34 | 35-39 | 40-44 | 45-49 | 50-54 | 55-59 | 60-64 | 65-69 | 25-29 | 30-34 | 35-39 | 40-44 | 45-49 | 50-54 | 55-59 | 60-64 | 65-69 |
| <b>OMAN</b>                             |       |       |       |       |       |       |       |       |       |       |       |       |       |       |       |       |       |       |
| <b>SMOKING</b>                          |       |       |       |       |       |       |       |       |       |       |       |       |       |       |       |       |       |       |
| A. Communicable diseases                | -     | 1.9   | 1.0   | 0.7   | 0.5   | 0.4   | 0.3   | 0.3   | 0.3   | -     | 1.6   | 0.9   | 0.5   | 0.4   | 0.3   | 0.3   | 0.2   | 0.3   |
| Respiratory infections and tuberculosis | -     | 1.9   | 1.0   | 0.7   | 0.5   | 0.4   | 0.3   | 0.3   | 0.3   | -     | 1.6   | 0.9   | 0.5   | 0.4   | 0.3   | 0.3   | 0.2   | 0.3   |
| B. Non-communicable diseases            | -     | 98.1  | 99.0  | 97.7  | 98.1  | 98.3  | 98.5  | 98.7  | 98.7  | -     | 98.4  | 99.1  | 97.0  | 98.1  | 98.1  | 98.3  | 98.5  | 97.0  |
| Neoplasms                               | -     | 0.3   | 0.4   | 0.5   | 0.9   | 1.4   | 2.1   | 2.8   | 3.4   | -     | 1.0   | 1.5   | 1.4   | 1.5   | 1.3   | 1.4   | 1.7   | 1.3   |
| Cardiovascular diseases                 | -     | 16.5  | 18.0  | 20.7  | 23.7  | 25.7  | 25.0  | 27.1  | 23.4  | -     | 22.4  | 23.8  | 22.9  | 32.8  | 36.5  | 34.2  | 38.0  | 27.6  |
| Chronic respiratory diseases            | -     | 28.9  | 32.1  | 31.6  | 30.5  | 28.8  | 30.4  | 30.6  | 32.6  | -     | 30.3  | 30.9  | 23.6  | 27.1  | 25.3  | 27.8  | 26.6  | 24.0  |
| Digestive diseases                      | -     | 4.6   | 3.6   | 2.6   | 1.8   | 1.3   | 0.9   | 0.6   | 0.5   | -     | 2.5   | 2.2   | 1.6   | 1.6   | 1.3   | 1.1   | 0.8   | 0.5   |
| Neurological disorders                  | -     | 0.7   | 0.5   | 0.3   | 0.4   | 0.6   | 0.9   | 1.7   | 3.5   | -     | 1.6   | 1.7   | 0.8   | 0.6   | 0.7   | 1.1   | 1.9   | 3.0   |
| Type2 diabetes mellitus                 | -     | 44.2  | 40.2  | 36.9  | 34.7  | 33.3  | 30.0  | 24.4  | 20.3  | -     | 37.3  | 35.0  | 43.1  | 29.1  | 26.7  | 24.5  | 19.0  | 27.6  |
| Sense organ diseases                    | -     | 3.0   | 4.2   | 4.9   | 6.0   | 7.1   | 9.2   | 11.4  | 15.0  | -     | 3.2   | 4.0   | 3.7   | 5.5   | 6.3   | 8.2   | 10.6  | 13.0  |
| C. Injuries                             | -     | -     | -     | 1.7   | 1.5   | 1.3   | 1.2   | 1.0   | 1.0   | -     | -     | -     | 2.4   | 1.5   | 1.5   | 1.4   | 1.3   | 2.7   |
| <b>SHS</b>                              |       |       |       |       |       |       |       |       |       |       |       |       |       |       |       |       |       |       |
| A. Communicable diseases                | 1.9   | 1.2   | 0.7   | 0.4   | 0.4   | 0.3   | 0.3   | 0.3   | 0.3   | 1.8   | 1.1   | 0.7   | 0.4   | 0.4   | 0.3   | 0.3   | 0.3   | 0.3   |
| Respiratory infections and tuberculosis | 1.9   | 1.2   | 0.7   | 0.4   | 0.4   | 0.3   | 0.3   | 0.3   | 0.3   | 1.8   | 1.1   | 0.7   | 0.4   | 0.4   | 0.3   | 0.3   | 0.3   | 0.3   |
| B. Non-communicable diseases            | 98.1  | 98.8  | 99.3  | 99.6  | 99.6  | 99.7  | 99.7  | 99.7  | 99.7  | 98.2  | 98.9  | 99.3  | 99.6  | 99.6  | 99.7  | 99.7  | 99.7  | 99.7  |
| Neoplasms                               | 0.0   | 0.0   | 0.0   | 0.0   | 0.0   | 0.1   | 0.1   | 0.2   | 0.3   | 0.2   | 0.5   | 0.6   | 0.8   | 0.9   | 0.7   | 0.5   | 0.5   | 0.4   |
| Cardiovascular diseases                 | 5.3   | 4.5   | 4.4   | 4.5   | 5.0   | 5.5   | 6.2   | 6.6   | 6.8   | 5.6   | 4.9   | 4.6   | 4.6   | 5.0   | 5.6   | 6.5   | 7.2   | 7.7   |
| Chronic respiratory diseases            | 25.2  | 23.7  | 21.7  | 20.1  | 19.1  | 18.6  | 19.1  | 20.4  | 22.5  | 36.9  | 33.2  | 27.8  | 23.1  | 19.9  | 18.0  | 17.7  | 18.1  | 19.4  |
| Type2 diabetes mellitus                 | 67.5  | 70.6  | 73.2  | 74.9  | 75.5  | 75.6  | 74.3  | 72.5  | 70.1  | 55.5  | 60.4  | 66.4  | 71.1  | 73.9  | 75.4  | 75.1  | 73.9  | 72.1  |

**Table S11: Percentage of morbidity cost distribution by cause of disease, age and gender in the GCC countries, 2016 (continued)**

|                                         | Men   |       |       |       |       |       |       |       |       | Women |       |       |       |       |       |       |       |       |
|-----------------------------------------|-------|-------|-------|-------|-------|-------|-------|-------|-------|-------|-------|-------|-------|-------|-------|-------|-------|-------|
|                                         | 25-29 | 30-34 | 35-39 | 40-44 | 45-49 | 50-54 | 55-59 | 60-64 | 65-69 | 25-29 | 30-34 | 35-39 | 40-44 | 45-49 | 50-54 | 55-59 | 60-64 | 65-69 |
| <b>QATAR</b>                            |       |       |       |       |       |       |       |       |       |       |       |       |       |       |       |       |       |       |
| <b>SMOKING</b>                          |       |       |       |       |       |       |       |       |       |       |       |       |       |       |       |       |       |       |
| A. Communicable diseases                | -     | 2.1   | 1.2   | 0.7   | 0.5   | 0.3   | 0.2   | 0.2   | 0.2   | -     | 1.8   | 1.1   | 0.7   | 0.4   | 0.3   | 0.2   | 0.2   | 0.2   |
| Respiratory infections and tuberculosis | -     | 2.1   | 1.2   | 0.7   | 0.5   | 0.3   | 0.2   | 0.2   | 0.2   | -     | 1.8   | 1.1   | 0.7   | 0.4   | 0.3   | 0.2   | 0.2   | 0.2   |
| B. Non-communicable diseases            | -     | 97.9  | 98.8  | 96.4  | 97.4  | 97.9  | 97.9  | 98.1  | 98.4  | -     | 98.2  | 98.9  | 97.9  | 97.7  | 98.2  | 98.7  | 98.1  | 98.1  |
| Neoplasms                               | -     | 0.2   | 0.3   | 0.4   | 0.6   | 1.2   | 1.9   | 3.0   | 4.7   | -     | 1.2   | 0.7   | 0.9   | 1.0   | 1.7   | 2.7   | 2.6   | 3.1   |
| Cardiovascular diseases                 | -     | 14.6  | 15.8  | 16.3  | 20.8  | 22.9  | 19.7  | 21.9  | 19.9  | -     | 14.1  | 16.3  | 20.9  | 21.9  | 27.6  | 26.5  | 25.0  | 24.1  |
| Chronic respiratory diseases            | -     | 30.3  | 35.3  | 32.7  | 37.4  | 37.7  | 36.6  | 37.5  | 41.1  | -     | 47.4  | 38.4  | 39.6  | 32.3  | 35.3  | 38.6  | 31.6  | 36.7  |
| Digestive diseases                      | -     | 6.8   | 5.3   | 3.5   | 2.8   | 1.8   | 1.1   | 0.8   | 0.6   | -     | 3.6   | 3.5   | 3.3   | 2.3   | 2.0   | 1.6   | 1.1   | 0.9   |
| Neurological disorders                  | -     | 0.5   | 0.5   | 0.3   | 0.4   | 0.6   | 0.8   | 1.5   | 2.9   | -     | 1.1   | 0.8   | 0.8   | 0.6   | 0.6   | 1.0   | 1.4   | 2.9   |
| Type2 diabetes mellitus                 | -     | 44.6  | 40.5  | 41.9  | 33.6  | 31.5  | 35.4  | 30.4  | 24.8  | -     | 30.2  | 38.1  | 30.9  | 37.9  | 28.7  | 25.3  | 33.1  | 25.4  |
| Sense organ diseases                    | -     | 0.8   | 1.1   | 1.2   | 1.7   | 2.1   | 2.4   | 3.1   | 4.3   | -     | 0.7   | 1.1   | 1.5   | 1.7   | 2.3   | 3.0   | 3.3   | 4.9   |
| C. Injuries                             | -     | -     | -     | 2.9   | 2.1   | 1.8   | 1.9   | 1.7   | 1.4   | -     | -     | -     | 1.4   | 1.9   | 1.5   | 1.1   | 1.7   | 1.8   |
| <b>SHS</b>                              |       |       |       |       |       |       |       |       |       |       |       |       |       |       |       |       |       |       |
| A. Communicable diseases                | 1.1   | 0.7   | 0.4   | 0.3   | 0.2   | 0.1   | 0.1   | 0.1   | 0.1   | 1.2   | 0.7   | 0.5   | 0.3   | 0.2   | 0.2   | 0.1   | 0.1   | 0.1   |
| Respiratory infections and tuberculosis | 1.1   | 0.7   | 0.4   | 0.3   | 0.2   | 0.1   | 0.1   | 0.1   | 0.1   | 1.2   | 0.7   | 0.5   | 0.3   | 0.2   | 0.2   | 0.1   | 0.1   | 0.1   |
| B. Non-communicable diseases            | 98.9  | 99.3  | 99.6  | 99.7  | 99.8  | 99.9  | 99.9  | 99.9  | 99.9  | 98.8  | 99.3  | 99.5  | 99.7  | 99.8  | 99.8  | 99.9  | 99.9  | 99.9  |
| Neoplasms                               | 0.0   | 0.0   | 0.0   | 0.0   | 0.0   | 0.1   | 0.1   | 0.2   | 0.2   | 0.1   | 0.5   | 0.8   | 1.1   | 1.1   | 1.4   | 1.4   | 1.4   | 1.4   |
| Cardiovascular diseases                 | 3.6   | 3.1   | 3.2   | 3.3   | 3.8   | 4.1   | 4.3   | 4.4   | 4.3   | 3.8   | 3.4   | 3.4   | 3.6   | 3.9   | 4.3   | 4.6   | 4.8   | 4.9   |
| Chronic respiratory diseases            | 27.2  | 25.5  | 23.5  | 21.8  | 20.3  | 19.4  | 18.9  | 18.9  | 19.8  | 39.6  | 35.7  | 30.6  | 26.1  | 22.4  | 19.9  | 18.1  | 17.4  | 17.9  |
| Type2 diabetes mellitus                 | 68.1  | 70.7  | 73.0  | 74.5  | 75.7  | 76.3  | 76.6  | 76.4  | 75.6  | 55.3  | 59.6  | 64.7  | 68.9  | 72.4  | 74.3  | 75.7  | 76.4  | 75.6  |

**Table S11: Percentage of morbidity cost distribution by cause of disease, age and gender in the GCC countries, 2016 (continued)**

|                                         | Men   |       |       |       |       |       |       |       |       | Women |       |       |       |       |       |       |       |       |
|-----------------------------------------|-------|-------|-------|-------|-------|-------|-------|-------|-------|-------|-------|-------|-------|-------|-------|-------|-------|-------|
|                                         | 25-29 | 30-34 | 35-39 | 40-44 | 45-49 | 50-54 | 55-59 | 60-64 | 65-69 | 25-29 | 30-34 | 35-39 | 40-44 | 45-49 | 50-54 | 55-59 | 60-64 | 65-69 |
| <b>SAUDI ARABIA</b>                     |       |       |       |       |       |       |       |       |       |       |       |       |       |       |       |       |       |       |
| <b>SMOKING</b>                          |       |       |       |       |       |       |       |       |       |       |       |       |       |       |       |       |       |       |
| A. Communicable diseases                | -     | 2.5   | 1.6   | 1.1   | 0.8   | 0.6   | 0.5   | 0.4   | 0.4   | -     | 2.1   | 1.7   | 1.1   | 0.8   | 0.6   | 0.5   | 0.4   | 0.5   |
| Respiratory infections and tuberculosis | -     | 2.5   | 1.6   | 1.1   | 0.8   | 0.6   | 0.5   | 0.4   | 0.4   | -     | 2.1   | 1.7   | 1.1   | 0.8   | 0.6   | 0.5   | 0.4   | 0.5   |
| B. Non-communicable diseases            | -     | 97.5  | 98.4  | 95.6  | 96.1  | 97.0  | 97.1  | 96.9  | 97.6  | -     | 97.9  | 98.3  | 96.1  | 96.4  | 95.3  | 95.8  | 96.2  | 95.0  |
| Neoplasms                               | -     | 0.4   | 0.6   | 0.9   | 1.3   | 2.0   | 3.0   | 3.3   | 4.5   | -     | 2.2   | 1.0   | 1.2   | 1.6   | 1.5   | 1.7   | 1.6   | 1.5   |
| Cardiovascular diseases                 | -     | 18.3  | 20.5  | 22.9  | 25.7  | 29.2  | 26.6  | 27.1  | 26.0  | -     | 19.6  | 22.3  | 28.4  | 31.8  | 32.0  | 31.5  | 35.3  | 30.8  |
| Chronic respiratory diseases            | -     | 24.7  | 28.3  | 29.4  | 30.7  | 33.5  | 36.6  | 36.2  | 42.2  | -     | 47.8  | 30.5  | 32.8  | 30.3  | 27.7  | 33.2  | 34.4  | 36.7  |
| Digestive diseases                      | -     | 5.2   | 4.2   | 3.0   | 2.0   | 1.5   | 1.0   | 0.6   | 0.5   | -     | 2.6   | 2.6   | 2.5   | 2.0   | 1.4   | 1.1   | 0.9   | 0.7   |
| Neurological disorders                  | -     | 0.6   | 0.5   | 0.4   | 0.5   | 0.7   | 1.0   | 1.6   | 3.4   | -     | 1.1   | 1.1   | 0.7   | 0.9   | 0.9   | 1.1   | 1.8   | 3.2   |
| Type2 diabetes mellitus                 | -     | 47.2  | 42.6  | 37.2  | 33.7  | 27.6  | 25.8  | 24.4  | 15.4  | -     | 23.6  | 39.3  | 28.4  | 27.5  | 29.3  | 24.0  | 18.0  | 16.3  |
| Sense organ diseases                    | -     | 1.2   | 1.7   | 1.9   | 2.2   | 2.7   | 3.1   | 3.7   | 5.5   | -     | 1.0   | 1.5   | 2.1   | 2.3   | 2.4   | 3.2   | 4.2   | 5.8   |
| C. Injuries                             | -     | -     | -     | 3.3   | 3.1   | 2.5   | 2.4   | 2.7   | 2.0   | -     | -     | -     | 2.8   | 2.9   | 4.1   | 3.7   | 3.4   | 4.6   |
| <b>SHS</b>                              |       |       |       |       |       |       |       |       |       |       |       |       |       |       |       |       |       |       |
| A. Communicable diseases                | 0.8   | 0.5   | 0.3   | 0.3   | 0.2   | 0.2   | 0.2   | 0.1   | 0.2   | 0.9   | 0.6   | 0.4   | 0.3   | 0.3   | 0.2   | 0.2   | 0.2   | 0.2   |
| Respiratory infections and tuberculosis | 0.8   | 0.5   | 0.3   | 0.3   | 0.2   | 0.2   | 0.2   | 0.1   | 0.2   | 0.9   | 0.6   | 0.4   | 0.3   | 0.3   | 0.2   | 0.2   | 0.2   | 0.2   |
| B. Non-communicable diseases            | 99.2  | 99.5  | 99.7  | 99.7  | 99.8  | 99.8  | 99.8  | 99.9  | 99.8  | 99.1  | 99.4  | 99.6  | 99.7  | 99.7  | 99.8  | 99.8  | 99.8  | 99.8  |
| Neoplasms                               | 0.0   | 0.0   | 0.0   | 0.0   | 0.0   | 0.1   | 0.1   | 0.1   | 0.2   | 0.3   | 0.6   | 0.9   | 1.2   | 1.4   | 1.2   | 1.1   | 1.0   | 0.8   |
| Cardiovascular diseases                 | 3.6   | 3.2   | 3.4   | 3.7   | 4.4   | 5.0   | 5.6   | 6.0   | 6.3   | 5.0   | 4.4   | 4.4   | 4.7   | 5.5   | 6.4   | 7.5   | 8.2   | 8.9   |
| Chronic respiratory diseases            | 14.6  | 14.4  | 14.0  | 13.9  | 14.0  | 14.7  | 15.6  | 17.0  | 18.6  | 27.3  | 25.5  | 22.5  | 19.8  | 18.1  | 17.5  | 17.7  | 18.6  | 20.1  |
| Type2 diabetes mellitus                 | 81.0  | 81.8  | 82.3  | 82.2  | 81.4  | 80.1  | 78.6  | 76.7  | 74.7  | 66.6  | 68.9  | 71.7  | 74.0  | 74.8  | 74.6  | 73.5  | 71.9  | 70.0  |

**Table S11: Percentage of morbidity cost distribution by cause of disease, age and gender in the GCC countries, 2016 (continued)**

|                                         | Men   |       |       |       |       |       |       |       |       | Women |       |       |       |       |       |       |       |       |
|-----------------------------------------|-------|-------|-------|-------|-------|-------|-------|-------|-------|-------|-------|-------|-------|-------|-------|-------|-------|-------|
|                                         | 25-29 | 30-34 | 35-39 | 40-44 | 45-49 | 50-54 | 55-59 | 60-64 | 65-69 | 25-29 | 30-34 | 35-39 | 40-44 | 45-49 | 50-54 | 55-59 | 60-64 | 65-69 |
| <b>UAE</b>                              |       |       |       |       |       |       |       |       |       |       |       |       |       |       |       |       |       |       |
| <b>SMOKING</b>                          |       |       |       |       |       |       |       |       |       |       |       |       |       |       |       |       |       |       |
| A. Communicable diseases                | -     | 1.4   | 0.8   | 0.5   | 0.4   | 0.3   | 0.2   | 0.2   | 0.2   | -     | 1.2   | 0.8   | 0.4   | 0.3   | 0.2   | 0.2   | 0.2   | 0.2   |
| Respiratory infections and tuberculosis | -     | 1.4   | 0.8   | 0.5   | 0.4   | 0.3   | 0.2   | 0.2   | 0.2   | -     | 1.2   | 0.8   | 0.4   | 0.3   | 0.2   | 0.2   | 0.2   | 0.2   |
| B. Non-communicable diseases            | -     | 98.6  | 99.2  | 96.9  | 97.6  | 97.8  | 97.8  | 98.3  | 98.2  | -     | 98.8  | 99.2  | 96.0  | 98.2  | 97.3  | 98.9  | 95.9  | 97.7  |
| Neoplasms                               | -     | 0.4   | 0.6   | 0.8   | 1.3   | 2.1   | 3.2   | 4.9   | 5.2   | -     | 1.0   | 1.2   | 0.9   | 1.6   | 1.9   | 3.8   | 3.7   | 2.7   |
| Cardiovascular diseases                 | -     | 13.9  | 13.8  | 16.0  | 17.6  | 20.1  | 18.1  | 22.0  | 19.7  | -     | 24.1  | 18.1  | 23.2  | 33.1  | 30.6  | 32.4  | 21.9  | 28.4  |
| Chronic respiratory diseases            | -     | 43.7  | 49.4  | 50.0  | 49.5  | 46.5  | 46.1  | 45.9  | 45.8  | -     | 47.1  | 31.9  | 35.6  | 42.9  | 35.6  | 45.5  | 27.0  | 42.6  |
| Digestive diseases                      | -     | 3.6   | 2.6   | 1.9   | 1.3   | 0.9   | 0.6   | 0.5   | 0.4   | -     | 2.3   | 1.5   | 1.4   | 1.4   | 1.0   | 0.9   | 0.5   | 0.7   |
| Neurological disorders                  | -     | 1.3   | 0.7   | 0.4   | 0.4   | 0.6   | 0.6   | 1.2   | 2.5   | -     | 3.7   | 3.5   | 0.8   | 0.7   | 0.6   | 1.2   | 1.2   | 2.8   |
| Type2 diabetes mellitus                 | -     | 35.1  | 31.0  | 26.4  | 25.9  | 25.6  | 26.9  | 20.5  | 20.2  | -     | 19.9  | 42.2  | 32.9  | 16.7  | 25.6  | 11.9  | 39.0  | 15.4  |
| Sense organ diseases                    | -     | 0.8   | 1.1   | 1.4   | 1.6   | 2.0   | 2.3   | 3.2   | 4.3   | -     | 0.8   | 0.8   | 1.2   | 1.9   | 2.0   | 3.1   | 2.4   | 5.1   |
| C. Injuries                             | -     | -     | -     | 2.6   | 2.1   | 2.0   | 1.9   | 1.5   | 1.6   | -     | -     | -     | 3.6   | 1.4   | 2.4   | 0.9   | 3.9   | 2.1   |
| <b>SHS</b>                              |       |       |       |       |       |       |       |       |       |       |       |       |       |       |       |       |       |       |
| A. Communicable diseases                | 0.8   | 0.5   | 0.3   | 0.2   | 0.2   | 0.1   | 0.1   | 0.1   | 0.1   | 0.8   | 0.5   | 0.3   | 0.2   | 0.2   | 0.1   | 0.1   | 0.1   | 0.1   |
| Respiratory infections and tuberculosis | 0.8   | 0.5   | 0.3   | 0.2   | 0.2   | 0.1   | 0.1   | 0.1   | 0.1   | 0.8   | 0.5   | 0.3   | 0.2   | 0.2   | 0.1   | 0.1   | 0.1   | 0.1   |
| B. Non-communicable diseases            | 99.2  | 99.5  | 99.7  | 99.8  | 99.8  | 99.9  | 99.9  | 99.9  | 99.9  | 99.2  | 99.5  | 99.7  | 99.8  | 99.8  | 99.9  | 99.9  | 99.9  | 99.9  |
| Neoplasms                               | 0.0   | 0.0   | 0.0   | 0.0   | 0.0   | 0.1   | 0.1   | 0.3   | 0.3   | 0.2   | 0.4   | 0.6   | 0.8   | 1.2   | 1.3   | 1.5   | 1.3   | 0.8   |
| Cardiovascular diseases                 | 3.8   | 3.4   | 3.4   | 3.6   | 3.9   | 4.4   | 4.9   | 5.3   | 5.7   | 5.8   | 5.1   | 5.1   | 5.3   | 5.7   | 6.1   | 6.7   | 7.1   | 7.5   |
| Chronic respiratory diseases            | 37.9  | 34.5  | 31.2  | 28.3  | 25.6  | 23.6  | 22.9  | 22.7  | 23.5  | 36.9  | 33.5  | 29.0  | 25.1  | 21.9  | 20.0  | 19.3  | 19.4  | 20.7  |
| Type2 diabetes mellitus                 | 57.6  | 61.6  | 65.1  | 67.9  | 70.3  | 71.9  | 71.9  | 71.6  | 70.4  | 56.2  | 60.5  | 65.0  | 68.6  | 71.1  | 72.4  | 72.5  | 72.1  | 70.8  |

SHS, Secondhand smoke exposure; for age groups 15-19 and 20-24, morbidity cost related to SHS is not presented, as the only cause is lower respiratory infections in category "Respiratory infections and tuberculosis"

**Table S12: Percentage of mortality cost distribution by cause of disease, age and gender in the GCC countries, 2016**

|                                         | Men   |       |       |       |       |       |       |       |       | Women |       |       |       |       |       |       |       |       |
|-----------------------------------------|-------|-------|-------|-------|-------|-------|-------|-------|-------|-------|-------|-------|-------|-------|-------|-------|-------|-------|
|                                         | 25-29 | 30-34 | 35-39 | 40-44 | 45-49 | 50-54 | 55-59 | 60-64 | 65-69 | 25-29 | 30-34 | 35-39 | 40-44 | 45-49 | 50-54 | 55-59 | 60-64 | 65-69 |
| <b>BAHRAIN</b>                          |       |       |       |       |       |       |       |       |       |       |       |       |       |       |       |       |       |       |
| <b>SMOKING</b>                          |       |       |       |       |       |       |       |       |       |       |       |       |       |       |       |       |       |       |
| A. Communicable diseases                | -     | 9.1   | 7.0   | 5.0   | 2.9   | 2.9   | 3.1   | 3.3   | 3.9   | -     | 12.2  | 8.2   | 3.7   | 2.7   | 2.8   | 2.9   | 3.5   | 3.3   |
| Respiratory infections and tuberculosis | -     | 9.1   | 7.0   | 5.0   | 2.9   | 2.9   | 3.1   | 3.3   | 3.9   | -     | 12.2  | 8.2   | 3.7   | 2.7   | 2.8   | 2.9   | 3.5   | 3.3   |
| B. Non-communicable diseases            | -     | 90.9  | 93.0  | 94.0  | 96.6  | 96.9  | 96.6  | 96.5  | 96.0  | -     | 87.8  | 91.8  | 95.6  | 96.9  | 97.0  | 96.9  | 96.3  | 96.5  |
| Neoplasms                               | -     | 7.9   | 11.0  | 13.4  | 16.4  | 19.8  | 25.0  | 29.1  | 30.7  | -     | 13.1  | 19.3  | 22.5  | 21.6  | 18.0  | 21.8  | 18.4  | 18.1  |
| Cardiovascular diseases                 | -     | 77.3  | 77.1  | 73.2  | 69.7  | 64.3  | 54.6  | 46.6  | 37.4  | -     | 62.2  | 60.3  | 61.2  | 63.6  | 64.2  | 52.9  | 54.5  | 51.2  |
| Chronic respiratory diseases            | -     | 1.9   | 1.9   | 1.9   | 1.9   | 2.7   | 3.6   | 5.4   | 8.8   | -     | 5.7   | 3.7   | 3.8   | 2.8   | 2.7   | 4.4   | 4.3   | 6.4   |
| Digestive diseases                      | -     | 0.7   | 0.5   | 0.4   | 0.3   | 0.3   | 0.5   | 0.4   | 0.7   | -     | 1.0   | 1.1   | 0.7   | 0.5   | 0.4   | 0.5   | 0.6   | 0.6   |
| Neurological disorders                  | -     | 0.3   | 0.2   | 0.4   | 0.4   | 0.6   | 0.8   | 1.2   | 2.0   | -     | 0.5   | 0.8   | 0.6   | 0.7   | 0.8   | 1.1   | 1.6   | 2.7   |
| Type2 diabetes mellitus                 | -     | 2.8   | 2.3   | 4.8   | 8.0   | 9.1   | 12.2  | 13.7  | 16.3  | -     | 5.2   | 6.7   | 6.7   | 7.7   | 10.9  | 16.4  | 16.9  | 17.5  |
| C. Injuries                             | -     | -     | -     | 1.0   | 0.5   | 0.3   | 0.2   | 0.2   | 0.2   | -     | -     | -     | 0.7   | 0.3   | 0.2   | 0.2   | 0.1   | 0.1   |
| <b>SHS</b>                              |       |       |       |       |       |       |       |       |       |       |       |       |       |       |       |       |       |       |
| A. Communicable diseases                | 11.1  | 9.1   | 6.6   | 5.9   | 3.6   | 4.0   | 4.3   | 4.7   | 5.2   | 19.1  | 15.1  | 10.1  | 6.3   | 4.5   | 5.1   | 4.7   | 5.9   | 5.1   |
| Respiratory infections and tuberculosis | 11.1  | 9.1   | 6.6   | 5.9   | 3.6   | 4.0   | 4.3   | 4.7   | 5.2   | 19.1  | 15.1  | 10.1  | 6.3   | 4.5   | 5.1   | 4.7   | 5.9   | 5.1   |
| B. Non-communicable diseases            | 88.9  | 90.9  | 93.4  | 94.1  | 96.4  | 96.0  | 95.7  | 95.3  | 94.8  | 80.9  | 84.9  | 89.9  | 93.7  | 95.5  | 94.9  | 95.3  | 94.1  | 94.9  |
| Neoplasms                               | 1.5   | 2.6   | 3.1   | 3.3   | 3.8   | 4.6   | 5.2   | 6.9   | 6.8   | 6.6   | 16.7  | 23.6  | 24.3  | 21.4  | 12.2  | 8.8   | 6.1   | 5.0   |
| Cardiovascular diseases                 | 78.5  | 79.8  | 82.4  | 74.8  | 67.3  | 59.4  | 52.6  | 41.8  | 35.3  | 57.1  | 48.3  | 42.2  | 44.1  | 43.6  | 41.8  | 35.8  | 32.6  | 34.2  |
| Chronic respiratory diseases            | 3.7   | 1.8   | 1.1   | 1.3   | 1.2   | 2.1   | 2.7   | 4.5   | 6.7   | 3.7   | 3.4   | 2.5   | 2.1   | 2.3   | 2.6   | 3.7   | 3.4   | 4.6   |
| Type2 diabetes mellitus                 | 5.2   | 6.7   | 6.8   | 14.8  | 24.0  | 30.0  | 35.2  | 42.1  | 46.0  | 13.4  | 16.4  | 21.6  | 23.1  | 28.2  | 38.3  | 46.9  | 52.1  | 51.2  |

**Table S12: Percentage of mortality cost distribution by cause of disease, age and gender in the GCC countries, 2016 (continued)**

|                                         | Men   |       |       |       |       |       |       |       |       | Women |       |       |       |       |       |       |       |       |
|-----------------------------------------|-------|-------|-------|-------|-------|-------|-------|-------|-------|-------|-------|-------|-------|-------|-------|-------|-------|-------|
|                                         | 25-29 | 30-34 | 35-39 | 40-44 | 45-49 | 50-54 | 55-59 | 60-64 | 65-69 | 25-29 | 30-34 | 35-39 | 40-44 | 45-49 | 50-54 | 55-59 | 60-64 | 65-69 |
| <b><u>KUWAIT</u></b>                    |       |       |       |       |       |       |       |       |       |       |       |       |       |       |       |       |       |       |
| <b>SMOKING</b>                          |       |       |       |       |       |       |       |       |       |       |       |       |       |       |       |       |       |       |
| A. Communicable diseases                | -     | 7.6   | 6.7   | 4.1   | 2.9   | 3.9   | 4.7   | 5.2   | 7.6   | -     | 17.2  | 12.0  | 8.5   | 4.9   | 6.4   | 8.5   | 8.4   | 13.1  |
| Respiratory infections and tuberculosis | -     | 7.6   | 6.7   | 4.1   | 2.9   | 3.9   | 4.7   | 5.2   | 7.6   | -     | 17.2  | 12.0  | 8.5   | 4.9   | 6.4   | 8.5   | 8.4   | 13.1  |
| B. Non-communicable diseases            | -     | 92.4  | 93.3  | 94.9  | 96.4  | 95.7  | 95.0  | 94.5  | 92.1  | -     | 82.8  | 88.0  | 90.8  | 94.7  | 93.3  | 91.2  | 91.5  | 86.8  |
| Neoplasms                               | -     | 3.5   | 5.7   | 7.4   | 9.6   | 12.3  | 17.8  | 22.3  | 29.2  | -     | 7.3   | 11.9  | 15.6  | 19.1  | 18.6  | 26.7  | 21.6  | 23.1  |
| Cardiovascular diseases                 | -     | 86.9  | 85.9  | 86.0  | 84.5  | 80.5  | 73.0  | 66.2  | 53.1  | -     | 70.2  | 71.5  | 70.5  | 70.9  | 70.1  | 55.6  | 61.8  | 52.5  |
| Chronic respiratory diseases            | -     | 1.1   | 0.9   | 0.6   | 0.9   | 1.3   | 1.8   | 2.7   | 4.3   | -     | 2.7   | 2.4   | 2.6   | 2.3   | 1.8   | 3.2   | 3.0   | 4.3   |
| Digestive diseases                      | -     | 0.2   | 0.3   | 0.3   | 0.2   | 0.3   | 0.3   | 0.3   | 0.4   | -     | 0.6   | 0.3   | 0.3   | 0.3   | 0.3   | 0.4   | 0.4   | 0.3   |
| Neurological disorders                  | -     | 0.2   | 0.1   | 0.2   | 0.2   | 0.4   | 0.7   | 1.3   | 2.6   | -     | 0.3   | 0.5   | 0.4   | 0.6   | 0.9   | 1.6   | 2.0   | 4.3   |
| Type2 diabetes mellitus                 | -     | 0.5   | 0.4   | 0.4   | 1.0   | 1.0   | 1.4   | 1.7   | 2.5   | -     | 1.7   | 1.5   | 1.4   | 1.5   | 1.6   | 3.7   | 2.7   | 2.3   |
| C. Injuries                             | -     | -     | -     | 1.0   | 0.7   | 0.4   | 0.3   | 0.3   | 0.3   | -     | -     | -     | 0.7   | 0.4   | 0.3   | 0.3   | 0.1   | 0.1   |
| <b>SHS</b>                              |       |       |       |       |       |       |       |       |       |       |       |       |       |       |       |       |       |       |
| A. Communicable diseases                | 14.3  | 8.8   | 8.4   | 5.9   | 4.5   | 6.9   | 8.2   | 10.3  | 14.8  | 35.5  | 24.8  | 19.4  | 16.9  | 11.2  | 16.1  | 19.5  | 20.4  | 28.2  |
| Respiratory infections and tuberculosis | 14.3  | 8.8   | 8.4   | 5.9   | 4.5   | 6.9   | 8.2   | 10.3  | 14.8  | 35.5  | 24.8  | 19.4  | 16.9  | 11.2  | 16.1  | 19.5  | 20.4  | 28.2  |
| B. Non-communicable diseases            | 85.7  | 91.2  | 91.6  | 94.1  | 95.5  | 93.1  | 91.8  | 89.7  | 85.2  | 64.5  | 75.2  | 80.6  | 83.1  | 88.8  | 83.9  | 80.5  | 79.6  | 71.8  |
| Neoplasms                               | 0.5   | 1.0   | 1.2   | 1.9   | 2.4   | 3.4   | 4.6   | 6.3   | 8.3   | 5.9   | 9.6   | 14.4  | 17.7  | 19.4  | 15.9  | 14.2  | 10.7  | 8.4   |
| Cardiovascular diseases                 | 82.7  | 88.0  | 88.7  | 90.4  | 89.6  | 84.9  | 81.3  | 74.1  | 63.8  | 51.5  | 57.1  | 57.3  | 56.0  | 58.2  | 56.0  | 49.2  | 51.0  | 45.5  |
| Chronic respiratory diseases            | 2.0   | 1.2   | 0.7   | 0.7   | 0.8   | 1.3   | 1.8   | 3.0   | 4.4   | 2.8   | 3.6   | 3.7   | 2.9   | 4.0   | 2.9   | 3.8   | 3.5   | 4.0   |
| Type2 diabetes mellitus                 | 0.5   | 1.0   | 1.0   | 1.1   | 2.6   | 3.5   | 4.1   | 6.2   | 8.6   | 4.4   | 4.9   | 5.3   | 6.5   | 7.1   | 9.1   | 13.3  | 14.4  | 14.0  |

**Table S12: Percentage of mortality cost distribution by cause of disease, age and gender in the GCC countries, 2016 (continued)**

|                                         | Men   |       |       |       |       |       |       |       |       | Women |       |       |       |       |       |       |       |       |
|-----------------------------------------|-------|-------|-------|-------|-------|-------|-------|-------|-------|-------|-------|-------|-------|-------|-------|-------|-------|-------|
|                                         | 25-29 | 30-34 | 35-39 | 40-44 | 45-49 | 50-54 | 55-59 | 60-64 | 65-69 | 25-29 | 30-34 | 35-39 | 40-44 | 45-49 | 50-54 | 55-59 | 60-64 | 65-69 |
| <b>OMAN</b>                             |       |       |       |       |       |       |       |       |       |       |       |       |       |       |       |       |       |       |
| <b>SMOKING</b>                          |       |       |       |       |       |       |       |       |       |       |       |       |       |       |       |       |       |       |
| A. Communicable diseases                | -     | 10.5  | 6.9   | 5.0   | 3.8   | 2.9   | 3.7   | 4.7   | 6.4   | -     | 9.3   | 6.0   | 3.0   | 2.4   | 2.2   | 3.2   | 3.3   | 4.9   |
| Respiratory infections and tuberculosis | -     | 10.5  | 6.9   | 5.0   | 3.8   | 2.9   | 3.7   | 4.7   | 6.4   | -     | 9.3   | 6.0   | 3.0   | 2.4   | 2.2   | 3.2   | 3.3   | 4.9   |
| B. Non-communicable diseases            | -     | 89.5  | 93.1  | 92.3  | 94.7  | 96.2  | 95.8  | 95.0  | 93.3  | -     | 90.7  | 94.0  | 95.0  | 97.0  | 97.4  | 96.5  | 96.5  | 94.7  |
| Neoplasms                               | -     | 5.0   | 8.5   | 10.7  | 12.9  | 14.5  | 17.4  | 18.2  | 19.9  | -     | 6.9   | 12.0  | 14.2  | 13.5  | 11.5  | 11.9  | 11.5  | 11.6  |
| Cardiovascular diseases                 | -     | 82.0  | 82.2  | 78.9  | 78.5  | 77.4  | 72.9  | 69.4  | 62.3  | -     | 80.0  | 77.7  | 75.1  | 79.3  | 81.1  | 78.2  | 78.4  | 70.4  |
| Chronic respiratory diseases            | -     | 0.6   | 0.7   | 0.5   | 0.7   | 1.0   | 1.6   | 2.9   | 5.2   | -     | 0.9   | 0.8   | 0.7   | 0.7   | 0.8   | 1.3   | 1.7   | 2.7   |
| Digestive diseases                      | -     | 0.3   | 0.2   | 0.5   | 0.3   | 0.3   | 0.3   | 0.2   | 0.2   | -     | 0.1   | 0.1   | 0.1   | 0.1   | 0.1   | 0.1   | 0.1   | 0.1   |
| Neurological disorders                  | -     | 0.3   | 0.2   | 0.2   | 0.2   | 0.4   | 0.7   | 1.1   | 2.2   | -     | 0.6   | 0.8   | 0.9   | 0.6   | 0.6   | 0.9   | 1.2   | 2.0   |
| Type2 diabetes mellitus                 | -     | 1.3   | 1.3   | 1.4   | 2.2   | 2.6   | 3.0   | 3.1   | 3.4   | -     | 2.2   | 2.6   | 4.0   | 2.8   | 3.3   | 4.1   | 3.6   | 7.9   |
| C. Injuries                             | -     | -     | -     | 2.7   | 1.4   | 0.9   | 0.5   | 0.3   | 0.3   | -     | -     | -     | 2.0   | 0.7   | 0.4   | 0.3   | 0.2   | 0.4   |
| <b>SHS</b>                              |       |       |       |       |       |       |       |       |       |       |       |       |       |       |       |       |       |       |
| A. Communicable diseases                | 13.1  | 12.8  | 9.2   | 7.8   | 6.3   | 5.2   | 6.3   | 8.7   | 11.1  | 21.3  | 18.1  | 12.7  | 7.2   | 6.0   | 6.2   | 7.7   | 8.9   | 11.0  |
| Respiratory infections and tuberculosis | 13.1  | 12.8  | 9.2   | 7.8   | 6.3   | 5.2   | 6.3   | 8.7   | 11.1  | 21.3  | 18.1  | 12.7  | 7.2   | 6.0   | 6.2   | 7.7   | 8.9   | 11.0  |
| B. Non-communicable diseases            | 86.9  | 87.2  | 90.8  | 92.2  | 93.7  | 94.8  | 93.7  | 91.3  | 88.9  | 78.7  | 81.9  | 87.3  | 92.8  | 94.0  | 93.8  | 92.3  | 91.1  | 89.0  |
| Neoplasms                               | 0.6   | 1.0   | 1.5   | 1.9   | 2.4   | 2.9   | 3.2   | 3.8   | 3.6   | 2.2   | 6.4   | 8.7   | 11.2  | 10.2  | 7.0   | 4.5   | 3.5   | 2.4   |
| Cardiovascular diseases                 | 83.7  | 83.0  | 85.6  | 85.4  | 83.6  | 81.9  | 78.8  | 72.3  | 68.2  | 70.2  | 68.0  | 67.8  | 68.1  | 66.3  | 65.5  | 64.1  | 62.5  | 61.0  |
| Chronic respiratory diseases            | 0.4   | 0.2   | 0.3   | 0.3   | 0.4   | 0.8   | 1.1   | 2.4   | 3.9   | 0.4   | 0.4   | 0.5   | 0.4   | 0.5   | 0.7   | 0.9   | 1.7   | 2.2   |
| Type2 diabetes mellitus                 | 2.3   | 2.9   | 3.4   | 4.6   | 7.3   | 9.2   | 10.5  | 12.7  | 13.1  | 6.0   | 7.1   | 10.3  | 13.2  | 17.0  | 20.6  | 22.7  | 23.5  | 23.4  |

**Table S12: Percentage of mortality cost distribution by cause of disease, age and gender in the GCC countries, 2016 (continued)**

|                                         | Men   |       |       |       |       |       |       |       |       | Women |       |       |       |       |       |       |       |       |
|-----------------------------------------|-------|-------|-------|-------|-------|-------|-------|-------|-------|-------|-------|-------|-------|-------|-------|-------|-------|-------|
|                                         | 25-29 | 30-34 | 35-39 | 40-44 | 45-49 | 50-54 | 55-59 | 60-64 | 65-69 | 25-29 | 30-34 | 35-39 | 40-44 | 45-49 | 50-54 | 55-59 | 60-64 | 65-69 |
| <b>QATAR</b>                            |       |       |       |       |       |       |       |       |       |       |       |       |       |       |       |       |       |       |
| <b>SMOKING</b>                          |       |       |       |       |       |       |       |       |       |       |       |       |       |       |       |       |       |       |
| A. Communicable diseases                | -     | 13.6  | 10.0  | 5.2   | 3.5   | 2.2   | 2.9   | 3.4   | 3.9   | -     | 11.2  | 8.8   | 4.0   | 4.0   | 3.5   | 2.6   | 2.5   | 3.6   |
| Respiratory infections and tuberculosis | -     | 13.6  | 10.0  | 5.2   | 3.5   | 2.2   | 2.9   | 3.4   | 3.9   | -     | 11.2  | 8.8   | 4.0   | 4.0   | 3.5   | 2.6   | 2.5   | 3.6   |
| B. Non-communicable diseases            | -     | 86.4  | 90.0  | 90.1  | 94.6  | 96.7  | 96.1  | 95.9  | 95.6  | -     | 88.8  | 91.2  | 95.0  | 95.2  | 96.2  | 97.3  | 97.3  | 96.2  |
| Neoplasms                               | -     | 8.3   | 10.6  | 13.3  | 19.0  | 23.0  | 29.4  | 33.7  | 37.9  | -     | 29.7  | 24.4  | 25.2  | 26.2  | 28.1  | 32.6  | 26.1  | 28.9  |
| Cardiovascular diseases                 | -     | 73.9  | 75.3  | 72.8  | 70.5  | 66.4  | 55.6  | 49.0  | 40.3  | -     | 51.7  | 58.3  | 61.2  | 59.8  | 56.7  | 53.4  | 54.5  | 48.8  |
| Chronic respiratory diseases            | -     | 2.2   | 1.9   | 1.6   | 1.9   | 2.0   | 2.8   | 4.1   | 6.8   | -     | 3.6   | 4.1   | 3.0   | 2.6   | 3.4   | 3.1   | 3.1   | 4.5   |
| Digestive diseases                      | -     | 0.6   | 0.5   | 0.4   | 0.4   | 0.4   | 0.3   | 0.3   | 0.3   | -     | 0.9   | 0.8   | 1.0   | 0.7   | 0.9   | 0.6   | 0.4   | 0.4   |
| Neurological disorders                  | -     | 0.4   | 0.3   | 0.2   | 0.2   | 0.5   | 0.8   | 1.5   | 3.0   | -     | 0.4   | 0.4   | 0.4   | 0.5   | 1.0   | 1.7   | 2.5   | 4.7   |
| Type2 diabetes mellitus                 | -     | 1.0   | 1.5   | 1.7   | 2.7   | 4.5   | 7.2   | 7.3   | 7.4   | -     | 2.5   | 3.3   | 4.3   | 5.4   | 6.1   | 6.0   | 10.7  | 9.0   |
| C. Injuries                             | -     | -     | -     | 4.6   | 1.9   | 1.1   | 1.1   | 0.6   | 0.5   | -     | -     | -     | 1.0   | 0.8   | 0.3   | 0.2   | 0.2   | 0.2   |
| <b>SHS</b>                              |       |       |       |       |       |       |       |       |       |       |       |       |       |       |       |       |       |       |
| A. Communicable diseases                | 22.3  | 14.3  | 10.9  | 6.7   | 4.7   | 2.9   | 3.9   | 5.0   | 5.6   | 32.9  | 13.5  | 9.0   | 4.6   | 5.8   | 5.4   | 4.1   | 4.4   | 5.9   |
| Respiratory infections and tuberculosis | 22.3  | 14.3  | 10.9  | 6.7   | 4.7   | 2.9   | 3.9   | 5.0   | 5.6   | 32.9  | 13.5  | 9.0   | 4.6   | 5.8   | 5.4   | 4.1   | 4.4   | 5.9   |
| B. Non-communicable diseases            | 77.7  | 85.7  | 89.1  | 93.3  | 95.3  | 97.1  | 96.1  | 95.0  | 94.4  | 67.1  | 86.5  | 91.0  | 95.4  | 94.2  | 94.6  | 95.9  | 95.6  | 94.1  |
| Neoplasms                               | 1.5   | 2.9   | 2.7   | 3.4   | 5.2   | 5.6   | 6.1   | 8.0   | 6.9   | 7.4   | 20.6  | 31.0  | 31.0  | 27.0  | 22.9  | 16.8  | 10.2  | 8.4   |
| Cardiovascular diseases                 | 70.9  | 75.8  | 79.0  | 81.9  | 76.2  | 68.6  | 61.5  | 51.4  | 44.9  | 47.8  | 49.1  | 43.7  | 42.1  | 43.3  | 36.2  | 40.0  | 39.3  | 38.8  |
| Chronic respiratory diseases            | 3.7   | 3.9   | 2.4   | 2.3   | 2.0   | 2.0   | 2.5   | 3.9   | 5.6   | 6.2   | 6.6   | 6.8   | 3.9   | 4.1   | 4.5   | 3.3   | 3.3   | 3.8   |
| Type2 diabetes mellitus                 | 1.6   | 3.0   | 5.0   | 5.7   | 11.9  | 20.9  | 26.1  | 31.6  | 37.0  | 5.7   | 10.2  | 9.5   | 18.4  | 19.7  | 31.1  | 35.9  | 42.7  | 43.1  |



**Table S12: Percentage of mortality cost distribution by cause of disease, age and gender in the GCC countries, 2016 (continued)**

|                                         | Men   |       |       |       |       |       |       |       |       | Women |       |       |       |       |       |       |       |       |
|-----------------------------------------|-------|-------|-------|-------|-------|-------|-------|-------|-------|-------|-------|-------|-------|-------|-------|-------|-------|-------|
|                                         | 25-29 | 30-34 | 35-39 | 40-44 | 45-49 | 50-54 | 55-59 | 60-64 | 65-69 | 25-29 | 30-34 | 35-39 | 40-44 | 45-49 | 50-54 | 55-59 | 60-64 | 65-69 |
| <b>SAUDI ARABIA</b>                     |       |       |       |       |       |       |       |       |       |       |       |       |       |       |       |       |       |       |
| <b>SMOKING</b>                          |       |       |       |       |       |       |       |       |       |       |       |       |       |       |       |       |       |       |
| A. Communicable diseases                | -     | 16.3  | 12.0  | 7.6   | 5.5   | 4.9   | 5.2   | 5.6   | 6.1   | -     | 15.8  | 16.4  | 9.5   | 7.3   | 6.8   | 6.3   | 6.0   | 7.3   |
| Respiratory infections and tuberculosis | -     | 16.3  | 12.0  | 7.6   | 5.5   | 4.9   | 5.2   | 5.6   | 6.1   | -     | 15.8  | 16.4  | 9.5   | 7.3   | 6.8   | 6.3   | 6.0   | 7.3   |
| B. Non-communicable diseases            | -     | 83.7  | 88.0  | 88.7  | 92.5  | 94.0  | 93.9  | 93.6  | 93.4  | -     | 84.2  | 83.6  | 89.1  | 91.7  | 92.2  | 93.0  | 93.5  | 92.0  |
| Neoplasms                               | -     | 5.6   | 8.2   | 9.7   | 12.7  | 14.4  | 20.4  | 21.9  | 27.3  | -     | 18.6  | 9.7   | 9.2   | 11.1  | 11.3  | 12.4  | 10.4  | 11.6  |
| Cardiovascular diseases                 | -     | 75.1  | 76.5  | 75.9  | 75.9  | 74.5  | 66.3  | 62.0  | 53.2  | -     | 59.8  | 68.2  | 75.3  | 75.4  | 74.5  | 72.1  | 74.2  | 67.7  |
| Chronic respiratory diseases            | -     | 1.7   | 2.1   | 1.9   | 2.2   | 3.2   | 4.5   | 6.0   | 8.4   | -     | 4.3   | 3.0   | 2.7   | 2.9   | 3.3   | 5.1   | 5.7   | 8.1   |
| Digestive diseases                      | -     | 0.4   | 0.3   | 0.2   | 0.2   | 0.2   | 0.2   | 0.2   | 0.2   | -     | 0.4   | 0.5   | 0.3   | 0.2   | 0.3   | 0.2   | 0.2   | 0.2   |
| Neurological disorders                  | -     | 0.2   | 0.2   | 0.1   | 0.2   | 0.4   | 0.7   | 1.2   | 2.6   | -     | 0.2   | 0.3   | 0.3   | 0.4   | 0.5   | 0.7   | 1.1   | 2.0   |
| Type2 diabetes mellitus                 | -     | 0.7   | 0.8   | 0.9   | 1.4   | 1.3   | 1.9   | 2.2   | 1.6   | -     | 1.1   | 2.0   | 1.4   | 1.7   | 2.3   | 2.5   | 2.0   | 2.3   |
| C. Injuries                             | -     | -     | -     | 3.7   | 2.0   | 1.1   | 0.9   | 0.8   | 0.5   | -     | -     | -     | 1.4   | 1.0   | 1.0   | 0.7   | 0.6   | 0.8   |
| <b>SHS</b>                              |       |       |       |       |       |       |       |       |       |       |       |       |       |       |       |       |       |       |
| A. Communicable diseases                | 15.5  | 11.9  | 9.2   | 6.7   | 5.2   | 5.3   | 5.7   | 6.7   | 7.6   | 20.2  | 15.3  | 12.9  | 10.0  | 8.7   | 9.2   | 7.9   | 8.4   | 9.2   |
| Respiratory infections and tuberculosis | 15.5  | 11.9  | 9.2   | 6.7   | 5.2   | 5.3   | 5.7   | 6.7   | 7.6   | 20.2  | 15.3  | 12.9  | 10.0  | 8.7   | 9.2   | 7.9   | 8.4   | 9.2   |
| B. Non-communicable diseases            | 84.5  | 88.1  | 90.8  | 93.3  | 94.8  | 94.7  | 94.3  | 93.3  | 92.4  | 79.8  | 84.7  | 87.1  | 90.0  | 91.3  | 90.8  | 92.1  | 91.6  | 90.8  |
| Neoplasms                               | 0.8   | 1.1   | 1.5   | 1.6   | 2.0   | 2.2   | 2.7   | 3.4   | 4.1   | 3.3   | 8.4   | 12.4  | 11.0  | 9.6   | 7.2   | 5.1   | 3.5   | 2.6   |
| Cardiovascular diseases                 | 79.7  | 82.3  | 83.7  | 85.4  | 84.0  | 81.5  | 77.5  | 73.0  | 69.2  | 66.7  | 64.1  | 62.9  | 66.6  | 67.3  | 67.3  | 68.2  | 68.9  | 68.2  |
| Chronic respiratory diseases            | 2.2   | 1.9   | 2.2   | 1.9   | 1.9   | 2.9   | 3.5   | 5.0   | 6.4   | 3.7   | 4.3   | 3.6   | 2.8   | 3.1   | 3.9   | 4.8   | 5.4   | 6.2   |
| Type2 diabetes mellitus                 | 1.8   | 2.7   | 3.4   | 4.4   | 6.8   | 8.1   | 10.6  | 11.9  | 12.7  | 6.2   | 8.0   | 8.3   | 9.7   | 11.3  | 12.4  | 14.0  | 13.7  | 13.7  |

**Table S12: Percentage of mortality cost distribution by cause of disease, age and gender in the GCC countries, 2016 (continued)**

|                                         | Men   |       |       |       |       |       |       |       |       | Women |       |       |       |       |       |       |       |       |
|-----------------------------------------|-------|-------|-------|-------|-------|-------|-------|-------|-------|-------|-------|-------|-------|-------|-------|-------|-------|-------|
|                                         | 25-29 | 30-34 | 35-39 | 40-44 | 45-49 | 50-54 | 55-59 | 60-64 | 65-69 | 25-29 | 30-34 | 35-39 | 40-44 | 45-49 | 50-54 | 55-59 | 60-64 | 65-69 |
| <b>UAE</b>                              |       |       |       |       |       |       |       |       |       |       |       |       |       |       |       |       |       |       |
| <b>SMOKING</b>                          |       |       |       |       |       |       |       |       |       |       |       |       |       |       |       |       |       |       |
| A. Communicable diseases                | -     | 10.1  | 6.2   | 3.4   | 2.6   | 2.1   | 2.8   | 4.2   | 6.4   | -     | 8.6   | 5.9   | 4.3   | 2.2   | 2.0   | 1.8   | 2.5   | 5.1   |
| Respiratory infections and tuberculosis | -     | 10.1  | 6.2   | 3.4   | 2.6   | 2.1   | 2.8   | 4.2   | 6.4   | -     | 8.6   | 5.9   | 4.3   | 2.2   | 2.0   | 1.8   | 2.5   | 5.1   |
| B. Non-communicable diseases            | -     | 89.9  | 93.8  | 93.5  | 95.9  | 96.8  | 96.2  | 95.3  | 93.1  | -     | 91.4  | 94.1  | 93.0  | 97.2  | 97.1  | 98.0  | 96.6  | 94.5  |
| Neoplasms                               | -     | 9.9   | 14.5  | 14.5  | 16.5  | 18.9  | 27.9  | 27.7  | 29.9  | -     | 12.3  | 24.0  | 20.9  | 24.1  | 25.7  | 32.6  | 28.7  | 18.8  |
| Cardiovascular diseases                 | -     | 60.1  | 59.6  | 63.0  | 61.6  | 59.9  | 50.0  | 49.8  | 43.1  | -     | 71.1  | 58.1  | 59.3  | 64.7  | 61.6  | 52.8  | 48.8  | 58.2  |
| Chronic respiratory diseases            | -     | 18.2  | 18.3  | 14.7  | 15.5  | 14.7  | 13.3  | 12.9  | 13.5  | -     | 6.2   | 7.0   | 9.9   | 6.4   | 5.9   | 9.5   | 6.9   | 9.5   |
| Digestive diseases                      | -     | 0.4   | 0.4   | 0.3   | 0.3   | 0.4   | 0.3   | 0.3   | 0.3   | -     | 0.2   | 0.6   | 0.3   | 0.4   | 0.4   | 0.2   | 0.4   | 0.5   |
| Neurological disorders                  | -     | 0.5   | 0.3   | 0.2   | 0.2   | 0.4   | 0.7   | 1.2   | 2.4   | -     | 1.0   | 2.0   | 0.5   | 0.5   | 0.6   | 1.1   | 1.2   | 2.9   |
| Type2 diabetes mellitus                 | -     | 0.7   | 0.6   | 0.8   | 1.9   | 2.5   | 4.1   | 3.4   | 3.9   | -     | 0.6   | 2.3   | 1.9   | 1.0   | 2.9   | 1.8   | 10.5  | 4.6   |
| C. Injuries                             | -     | -     | -     | 3.0   | 1.5   | 1.0   | 0.9   | 0.5   | 0.6   | -     | -     | -     | 2.7   | 0.7   | 0.9   | 0.2   | 0.9   | 0.4   |
| <b>SHS</b>                              |       |       |       |       |       |       |       |       |       |       |       |       |       |       |       |       |       |       |
| A. Communicable diseases                | 10.4  | 7.5   | 5.2   | 3.6   | 2.9   | 2.7   | 3.8   | 6.0   | 9.1   | 16.4  | 10.4  | 6.1   | 5.6   | 3.2   | 2.9   | 2.9   | 4.4   | 7.3   |
| Respiratory infections and tuberculosis | 10.4  | 7.5   | 5.2   | 3.6   | 2.9   | 2.7   | 3.8   | 6.0   | 9.1   | 16.4  | 10.4  | 6.1   | 5.6   | 3.2   | 2.9   | 2.9   | 4.4   | 7.3   |
| B. Non-communicable diseases            | 89.6  | 92.5  | 94.8  | 96.4  | 97.1  | 97.3  | 96.2  | 94.0  | 90.9  | 83.6  | 89.6  | 93.9  | 94.4  | 96.8  | 97.1  | 97.1  | 95.6  | 92.7  |
| Neoplasms                               | 0.9   | 1.8   | 2.1   | 2.0   | 2.1   | 2.5   | 4.1   | 5.0   | 4.6   | 3.8   | 11.2  | 17.6  | 20.9  | 21.0  | 18.8  | 15.0  | 7.5   | 3.6   |
| Cardiovascular diseases                 | 60.4  | 62.3  | 69.7  | 74.5  | 70.9  | 66.8  | 61.9  | 56.4  | 53.6  | 71.0  | 64.2  | 59.6  | 54.3  | 58.0  | 53.1  | 49.0  | 50.3  | 51.1  |
| Chronic respiratory diseases            | 27.3  | 26.4  | 20.7  | 15.9  | 14.7  | 14.5  | 11.5  | 11.5  | 11.1  | 6.9   | 9.7   | 10.1  | 11.0  | 7.4   | 7.2   | 9.0   | 7.7   | 6.9   |
| Type2 diabetes mellitus                 | 1.0   | 2.0   | 2.4   | 4.0   | 9.4   | 13.5  | 18.8  | 21.1  | 21.6  | 2.0   | 4.5   | 6.5   | 8.2   | 10.5  | 18.1  | 24.1  | 30.1  | 31.1  |

SHS, Secondhand smoke exposure; for age groups 15-19 and 20-24, mortality cost related to SHS is not presented, as the only cause is lower respiratory infections in category "Respiratory infections and tuberculosis"

**Table S13: Mortality cost and total cost of smoking and secondhand smoke exposure at 0% and 3% discount rate (r), GCC Countries, 2016.**

|         | Mortality Cost of Smoking & SHS |      |                          | Total Cost of Smoking & SHS |      |                          |
|---------|---------------------------------|------|--------------------------|-----------------------------|------|--------------------------|
|         | % of GDP                        |      | Change in Total Cost (%) | % of GDP                    |      | Change in Total Cost (%) |
|         | r=0%                            | r=3% |                          | r=0%                        | r=3% |                          |
| Bahrain | 0.34                            | 0.27 | -21.3                    | 1.41                        | 1.34 | -5.1                     |
| Kuwait  | 0.53                            | 0.39 | -26.3                    | 1.45                        | 1.31 | -9.6                     |
| Oman    | 0.30                            | 0.23 | -22.2                    | 0.97                        | 0.90 | -6.9                     |
| Qatar   | 0.17                            | 0.13 | -23.4                    | 0.59                        | 0.55 | -6.6                     |
| KSA     | 0.34                            | 0.27 | -22.2                    | 0.98                        | 0.90 | -7.8                     |
| UAE     | 0.51                            | 0.38 | -24.2                    | 1.23                        | 1.11 | -9.9                     |
| All     | 0.37                            | 0.29 | -23.3                    | 1.04                        | 0.96 | -8.3                     |

KSA, Kingdom of Saudi Arabia; UAE, United Arab Emirates; SHS, secondhand smoke exposure; GDP, Gross Domestic Product

**Table S14: Total cost of smoking and secondhand smoke exposure, including musculoskeletal disorders by country.**

|         | Morbidity Cost of Smoking |           | Mortality Cost of Smoking |           | Total Cost of Smoking |          |           | Total Cost of Smoking & SHS |          |           |
|---------|---------------------------|-----------|---------------------------|-----------|-----------------------|----------|-----------|-----------------------------|----------|-----------|
|         | PPP \$ (Million)          | % Change* | PPP \$ (Million)          | % Change* | PPP \$ (Million)      | % of GDP | % Change* | PPP \$ (Million)            | % of GDP | % Change* |
| Bahrain | 371                       | 89.6      | 181                       | 0.03      | 885                   | 1.31     | 24.7      | 1,127                       | 1.67%    | 18.4%     |
| Kuwait  | 1,459                     | 101.3     | 1,325                     | 0.01      | 4,182                 | 1.42     | 21.3      | 5,001                       | 1.70%    | 17.2%     |
| Oman    | 617                       | 95.9      | 453                       | 0.01      | 1,704                 | 0.90     | 21.6      | 2,120                       | 1.13%    | 16.6%     |
| Qatar   | 1,001                     | 106.3     | 448                       | 0.01      | 1,981                 | 0.60     | 35.2      | 2,451                       | 0.75%    | 26.7%     |
| KSA     | 6,073                     | 126.2     | 5,173                     | 0.01      | 17,021                | 0.97     | 24.9      | 20,580                      | 1.17%    | 19.7%     |
| UAE     | 3,314                     | 97.0      | 2,941                     | 0.01      | 8,439                 | 1.25     | 24.0      | 9,984                       | 1.47%    | 19.5%     |
| All     | 12,836                    | 110.8     | 10,523                    | 0.01      | 34,211                | 1.03     | 24.6      | 41,261                      | 1.25%    | 19.6%     |

KSA, Kingdom of Saudi Arabia; UAE, United Arab Emirates; SHS, secondhand smoke exposure; PPP\$, purchasing power parity dollars using international Monetary Fund 2016 conversion rates; GDP, Gross Domestic Product.

\* Percentage change in cost when musculoskeletal disorders are included.

**Table S15: Percentage distribution of morbidity, mortality and indirect cost by cause of disease, smoking and SHS, ages 30-69 (smoking) & 15-69 (SHS), both genders, GCC countries, 2016.**

|                                                   | BHR  | KWT  | OMN  | QTR  | KSA  | UAE  | ALL  |
|---------------------------------------------------|------|------|------|------|------|------|------|
| <b><u>Including Musculoskeletal Disorders</u></b> |      |      |      |      |      |      |      |
| <b>Morbidity Cost of Smoking &amp; SHS (%)</b>    |      |      |      |      |      |      |      |
| A. Communicable diseases                          | 0.3  | 0.4  | 0.5  | 0.4  | 0.5  | 0.3  | 0.4  |
| Respiratory infections and tuberculosis           | 0.3  | 0.4  | 0.5  | 0.4  | 0.5  | 0.3  | 0.4  |
| B. Non-communicable diseases                      | 99.2 | 99.0 | 99.1 | 99.0 | 98.8 | 99.1 | 98.9 |
| Neoplasms                                         | 0.5  | 0.5  | 0.5  | 0.5  | 0.6  | 0.6  | 0.6  |
| Cardiovascular diseases                           | 8.9  | 9.5  | 10.3 | 8.2  | 9.8  | 7.9  | 9.1  |
| Chronic respiratory diseases                      | 21.7 | 20.1 | 16.6 | 18.5 | 14.1 | 25.0 | 18.3 |
| Digestive diseases                                | 0.8  | 0.8  | 1.0  | 1.2  | 1.0  | 0.8  | 0.9  |
| Neurological disorders                            | 0.3  | 0.4  | 0.3  | 0.3  | 0.3  | 0.3  | 0.3  |
| Type2 diabetes mellitus                           | 27.9 | 23.8 | 26.6 | 27.7 | 24.6 | 22.3 | 24.4 |
| Musculoskeletal disorders                         | 38.3 | 42.9 | 41.2 | 42.0 | 47.5 | 41.6 | 44.4 |
| Sense organ diseases                              | 0.9  | 1.1  | 2.6  | 0.7  | 0.9  | 0.7  | 0.9  |
| C. Injuries                                       | 0.5  | 0.6  | 0.4  | 0.6  | 0.8  | 0.6  | 0.7  |
| <b>Mortality Cost of Smoking &amp; SHS (%)</b>    |      |      |      |      |      |      |      |
| A. Communicable diseases                          | 4.7  | 5.9  | 6.5  | 5.7  | 8.0  | 4.0  | 6.4  |
| Respiratory infections and tuberculosis           | 4.7  | 5.9  | 6.5  | 5.7  | 8.0  | 4.0  | 6.4  |
| B. Non-communicable diseases                      | 95.0 | 93.7 | 92.8 | 93.1 | 90.7 | 94.8 | 92.5 |
| Neoplasms                                         | 15.5 | 9.3  | 10.3 | 18.2 | 11.2 | 15.6 | 12.5 |
| Cardiovascular diseases                           | 64.5 | 81.4 | 78.1 | 65.7 | 74.2 | 60.4 | 70.9 |
| Chronic respiratory diseases                      | 2.7  | 1.2  | 0.9  | 2.4  | 2.8  | 15.4 | 6.0  |
| Digestive diseases                                | 0.3  | 0.2  | 0.3  | 0.3  | 0.2  | 0.3  | 0.2  |
| Neurological disorders                            | 0.5  | 0.3  | 0.3  | 0.5  | 0.3  | 0.3  | 0.3  |
| Type2 diabetes mellitus                           | 11.5 | 1.2  | 2.9  | 5.9  | 2.0  | 2.8  | 2.5  |
| Musculoskeletal disorders                         | 0.0  | 0.0  | 0.0  | 0.0  | 0.0  | 0.0  | 0.0  |
| Sense organ diseases                              | -    | -    | -    | -    | -    | -    | -    |
| C. Injuries                                       | 0.3  | 0.4  | 0.8  | 1.2  | 1.3  | 1.2  | 1.1  |
| <b>Indirect Cost of Smoking &amp; SHS (%)</b>     |      |      |      |      |      |      |      |
| A. Communicable diseases                          | 1.8  | 3.0  | 3.1  | 2.0  | 3.9  | 2.0  | 3.1  |
| Respiratory infections and tuberculosis           | 1.8  | 3.0  | 3.1  | 2.0  | 3.9  | 2.0  | 3.1  |
| B. Non-communicable diseases                      | 97.8 | 96.5 | 96.4 | 97.2 | 95.1 | 97.1 | 96.1 |
| Neoplasms                                         | 5.5  | 4.7  | 4.7  | 5.9  | 5.5  | 7.6  | 5.9  |
| Cardiovascular diseases                           | 27.4 | 43.8 | 39.7 | 25.9 | 39.3 | 32.4 | 36.8 |
| Chronic respiratory diseases                      | 15.4 | 11.1 | 9.8  | 13.5 | 8.9  | 20.5 | 12.8 |
| Digestive diseases                                | 0.6  | 0.5  | 0.7  | 0.9  | 0.6  | 0.6  | 0.6  |
| Neurological disorders                            | 0.4  | 0.3  | 0.3  | 0.3  | 0.3  | 0.3  | 0.3  |
| Type2 diabetes mellitus                           | 22.4 | 13.0 | 16.3 | 21.0 | 14.3 | 13.2 | 14.6 |
| Musculoskeletal disorders                         | 25.6 | 22.4 | 23.3 | 29.1 | 25.7 | 22.2 | 24.5 |
| Sense organ diseases                              | 0.6  | 0.6  | 1.5  | 0.5  | 0.5  | 0.4  | 0.5  |
| C. Injuries                                       | 0.4  | 0.5  | 0.6  | 0.8  | 1.0  | 0.9  | 0.9  |

**Table S15: Percentage distribution of morbidity, mortality and indirect cost by cause of disease, smoking & SHS, ages 30-69 (smoking) & 15-69 (SHS), both genders, GCC countries, 2016. (Continued)**

|                                                   | BHR  | KWT  | OMN  | QTR  | KSA  | UAE  | ALL  |
|---------------------------------------------------|------|------|------|------|------|------|------|
| <b><u>Excluding Musculoskeletal Disorders</u></b> |      |      |      |      |      |      |      |
| <b>Morbidity Cost of Smoking &amp; SHS (%)</b>    |      |      |      |      |      |      |      |
| A. Communicable diseases                          | 0.5  | 0.7  | 0.8  | 0.6  | 0.9  | 0.5  | 0.7  |
| Respiratory infections and tuberculosis           | 0.5  | 0.7  | 0.8  | 0.6  | 0.9  | 0.5  | 0.7  |
| B. Non-communicable diseases                      | 98.7 | 98.3 | 98.5 | 98.3 | 97.6 | 98.4 | 98.1 |
| Neoplasms                                         | 0.7  | 0.9  | 0.8  | 0.8  | 1.2  | 1.1  | 1.1  |
| Cardiovascular diseases                           | 14.4 | 16.6 | 17.5 | 14.1 | 18.7 | 13.5 | 16.4 |
| Chronic respiratory diseases                      | 35.2 | 35.2 | 28.2 | 31.8 | 26.9 | 42.7 | 32.9 |
| Digestive diseases                                | 1.3  | 1.4  | 1.7  | 2.1  | 1.8  | 1.3  | 1.6  |
| Neurological disorders                            | 0.5  | 0.7  | 0.5  | 0.5  | 0.5  | 0.5  | 0.5  |
| Type2 diabetes mellitus                           | 45.3 | 41.7 | 45.3 | 47.7 | 46.9 | 38.1 | 43.9 |
| Sense organ diseases                              | 1.4  | 1.9  | 4.5  | 1.2  | 1.7  | 1.1  | 1.6  |
| C. Injuries                                       | 0.7  | 1.0  | 0.7  | 1.1  | 1.5  | 1.1  | 1.2  |
| <b>Mortality Cost of Smoking &amp; SHS (%)</b>    |      |      |      |      |      |      |      |
| A. Communicable diseases                          | 4.7  | 5.9  | 6.5  | 5.7  | 8.0  | 4.0  | 6.4  |
| Respiratory infections and tuberculosis           | 4.7  | 5.9  | 6.5  | 5.7  | 8.0  | 4.0  | 6.4  |
| B. Non-communicable diseases                      | 95.0 | 93.7 | 92.8 | 93.1 | 90.7 | 94.8 | 92.5 |
| Neoplasms                                         | 15.5 | 9.3  | 10.3 | 18.2 | 11.2 | 15.6 | 12.5 |
| Cardiovascular diseases                           | 64.5 | 81.4 | 78.1 | 65.7 | 74.2 | 60.4 | 70.9 |
| Chronic respiratory diseases                      | 2.7  | 1.2  | 0.9  | 2.4  | 2.8  | 15.4 | 6.0  |
| Digestive diseases                                | 0.3  | 0.2  | 0.3  | 0.3  | 0.2  | 0.3  | 0.2  |
| Neurological disorders                            | 0.5  | 0.3  | 0.3  | 0.5  | 0.3  | 0.3  | 0.3  |
| Type2 diabetes mellitus                           | 11.5 | 1.2  | 2.9  | 5.9  | 2.0  | 2.8  | 2.5  |
| Sense organ diseases                              | -    | -    | -    | -    | -    | -    | -    |
| C. Injuries                                       | 0.3  | 0.4  | 0.8  | 1.2  | 1.3  | 1.2  | 1.1  |
| <b>Indirect Cost of Smoking &amp; SHS (%)</b>     |      |      |      |      |      |      |      |
| A. Communicable diseases                          | 2.4  | 3.9  | 4.0  | 2.8  | 5.3  | 2.6  | 4.1  |
| Respiratory infections and tuberculosis           | 2.4  | 3.9  | 4.0  | 2.8  | 5.3  | 2.6  | 4.1  |
| B. Non-communicable diseases                      | 97.1 | 95.5 | 95.3 | 96.0 | 93.4 | 96.3 | 94.8 |
| Neoplasms                                         | 7.3  | 6.1  | 6.2  | 8.4  | 7.4  | 9.8  | 7.9  |
| Cardiovascular diseases                           | 36.8 | 56.5 | 51.8 | 36.5 | 52.9 | 41.6 | 48.8 |
| Chronic respiratory diseases                      | 20.6 | 14.3 | 12.8 | 19.1 | 12.0 | 26.4 | 16.9 |
| Digestive diseases                                | 0.8  | 0.7  | 0.9  | 1.3  | 0.8  | 0.7  | 0.8  |
| Neurological disorders                            | 0.5  | 0.4  | 0.4  | 0.5  | 0.4  | 0.4  | 0.4  |
| Type2 diabetes mellitus                           | 30.1 | 16.8 | 21.3 | 29.6 | 19.2 | 17.0 | 19.3 |
| Sense organ diseases                              | 0.8  | 0.7  | 1.9  | 0.7  | 0.6  | 0.5  | 0.7  |
| C. Injuries                                       | 0.5  | 0.6  | 0.8  | 1.1  | 1.4  | 1.1  | 1.2  |

BHR, Bahrain; KWT, Kuwait; OMN, Oman; QTR, Qatar; KSA, Kingdom of Saudi Arabia; UAE, United Arab Emirates; GCC, Gulf Cooperation Council; SHS, Secondhand smoke.

**Figure S1: Percentage of morbidity and mortality cost distribution by gender and country, 2016.**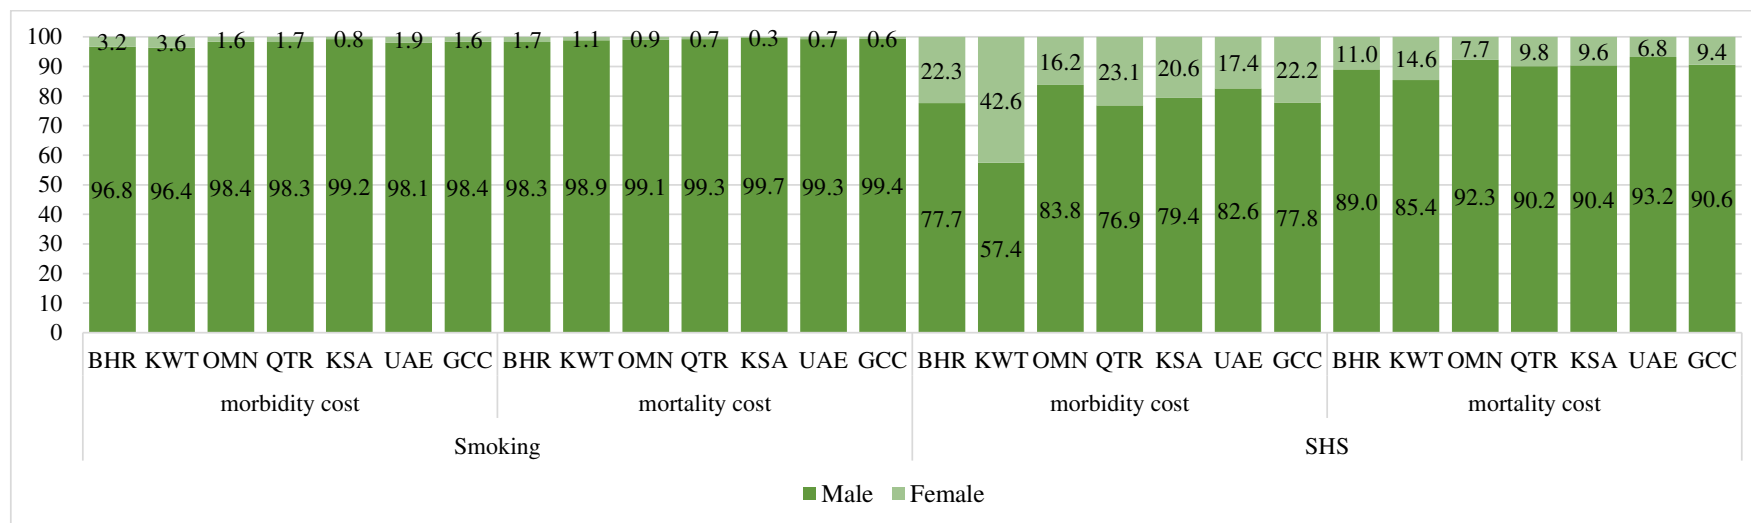

BHR, Bahrain; KWT, Kuwait; OMN, Oman; QTR, Qatar; KSA, Kingdom of Saudi Arabia; UAE, United Arab Emirates; GCC, Gulf Cooperation Council; SHS, Secondhand smoke.
